# Supplementary material
Source: PubMed Central journal article supplement (PMC3987905)
Supplement: NIHMS514131-supplement-supplement_1.pdf [file NIHMS514131-supplement-supplement_1.pdf]

and a uterus filled with resorptions (right) derived after 4n blastocyst injections with either VA-10 or the parental iPSC clone #45, respectively.

**Supplemental Figure 1: qPCR validation of *Gtl2* repression in iPSCs.** (a) Expression levels of the maternally expressed 12qF1 genes *Gtl2*, *Rian* and *Mirg* in three iPSC clones relative to ESC cells. (b) *Gtl2* expression levels measured by qPCR in iPSC clones and ESCs. The four iPSC clones showing similar expression levels to ESCs are highlighted in red. (c) Expression levels of *Gtl2* in 18 iPSC clones derived from keratinocytes isolated from two different Collagen-OKSM mice. Note that all of these iPSCs express *Gtl2* at significantly lower levels compared to ESCs. (d) Expression levels of *Gtl2* in starting cell populations as measured by qPCR as well as in ESCs. HSCs, hematopoietic stem cells; GMPs, granulocyte-macrophage progenitor; Gran., granulocytes; TTFs, tail-tip fibroblasts; MEFs, mouse embryonic fibroblasts.

**Supplemental Figure 2: Analysis of published array datasets.** (a) Analysis of expression levels of 294 transcripts that were previously reported to be differentially expressed between ESCs and iPSCs using non-genetically matched cells. None of these genes (blue bars) was differentially expressed in Collagen-OKSM ESCs and derivative iPSCs (1.5fold, p0.05, t-test). (b-e) Expression of the maternally expressed 12qF1 genes *Gtl2*, *Rian* and *Mirg* and pluripotency genes *Pou5f1* and *Nanog* in published microarray datasets containing ESCs (red bars) and iPSCs (green bars). p-values were determined using Student's t-test when replicate samples were available (all datasets except for d). Different starting populations and, in some cases, different combinations of

reprogramming factors were used, b) GSE10806; adult mouse neural stem cells transduced with individual retroviral vectors encoding for either Oct4 and Klf4 (2F-iPSCs) or Oct4, Klf4, Sox2 and c-myc (4F-iPSCs). c) GSE14012; MEFs transduced with individual retroviral vectors encoding for Oct4, Klf4, Sox2 and c-myc. d) GSE15775; adult bone marrow mononucleated cells transduced with individual retroviral vectors encoding for Oct4, Klf4, Sox2 and c-myc e) E-MEXP-1037; MEFs and TTFs transduced with individual retroviral vectors encoding for Oct4, Klf4, Sox2 and c-myc. Note the consistent downregulation of 12qF1 genes in iPSCs compared to ESCs.

**Supplemental Figure 3: Confirmation of origin of all-iPSC mice.** PCR was performed to detect three different Simple Sequence Length Polymorphism (SSLP) markers using genomic DNA isolated from 4n complementation-competent iPSC clones and derivative all-iPSC animals. Genomic DNA from BDF1 mice served as a positive control for the presence of host blastocyst-derived cells. Triangles indicate the position of strain-specific bands; open triangle = DBA (blastocyst-specific), grey triangle = 129 (iPSC-specific) and black triangle = B6 (present in both blastocysts and iPSCs).

**Supplemental Figure 4: Analysis of *Gtl2* expression in published 4n complementation-competent cell lines.** (a) Expression levels of *Gtl2* and *Rian* and pluripotency markers *Pou5f1* and *Nanog* in R1 ESCs and 4n complementation-competent iPSCs from GEO microarray dataset GSE17004. No significant differences ( $p > 0.1$ ) were found. (b) Expression levels of *Gtl2*, *Rian* and *Mirg* and pluripotency markers in CL11 ESCs, two 4n complementation-competent iPSC lines (14D-1 and 14D-101) and

one non-4n complementation-competent iPSC line (20D-3) from GEO dataset GSE16295. Note the dramatic decrease of *Gtl2* expression in 20D-3 iPSCs compared to the 4n complementation-competent lines and the ESCs.

**Supplemental Figure 5: DNA methylation analysis of the *Dlk1-Dio3* locus.** (a) Structure of the *Dlk1-Dio3* locus with the approximate position of the genomic regions analyzed by pyrosequencing indicated by black bars. (b) Degree of DNA methylation at the indicated regions in *Gtl2*<sup>off</sup> iPSC clones (green bars), *Gtl2*<sup>on</sup> iPSC clones (red bars), ESCs clones (red open bars), as well as parental tail-tip fibroblasts (TTFs, grey bars).

**Supplemental Figure 6: Imprinted gene expression after *in vitro* differentiation.** (a) Expression levels as measured by qPCR of the 12qF1 genes *Rian* and *Dlk1* in undifferentiated (P0) and retinoic acid (RA) treated *Gtl2*<sup>off</sup> iPSCs (green box), *Gtl2*<sup>on</sup> iPSCs (red box) and ESCs (red dotted line). *Gtl2*<sup>off</sup> iPSCs fail to activate expression of the maternally expressed gene *Rian*, but express high levels of the paternally expressed gene *Dlk1* upon differentiation. (b) Expression levels as measured by qPCR of the imprinted genes *Mest*, *Decorin*, *Phlda2* and *Cdkn1c*. Note that all cell lines activate these genes to a similar extent.

**Supplemental Figure 7: *Gtl2* expression in nuclear transfer-derived ESCs.** (a) Schematic representation of the derivation of NT-ESCs directly from somatic cells. NT-ESCs generated in this fashion have been shown to be molecularly indistinguishable from blastocyst-derived ESCs and to support the development of “All-ESC” mice. (b)

Expression levels of *Gtl2*, *Pou5f1* and *Nanog* in five blastocyst-derived ESC lines (red bars) and five ESC lines derived after nuclear transfer (NT) of somatic cell nuclei into enucleated oocytes (“cloning”) (green bars). The respective donor cell used for NT is indicated. **(c)** Experimental strategy to test whether nuclear transfer can rescue the defects seen in *Gtl2*<sup>off</sup> iPSCs. **(d)** Microarray heatmap showing expression of the indicated genes in ESCs, iPSCs generated with either adenoviral vectors (Adeno) or the Collagen-OKSM system (#7, #15) and NT-ESC lines derived from the iPSC clones. Note that *Gtl2* and *Rian* remain stably silenced in the NT clones while expression of the imprinted *H19* gene shows clone-to-clone variation.

**Supplemental Figure 8: Chromatin configuration at the *Gtl2* promoter after VA rescue.** Prevalence of activation-associated (acH3 and H3K4me) and repression-associated (H3K27me) chromatin marks at the *Gtl2* promoter in *Gtl2*<sup>off</sup> iPSC#45, derivative VA-10 and ESC#1.

**Supplemental Figure 9: Analysis of embryonic tissues derived after 4n blastocyst injections.** **(a)** Expression of *Gtl2*, *Rian* and *Dlk1* in head, heart and limb tissue isolated from midgestation embryos obtained after 4n blastocyst injection of *Gtl2*<sup>on</sup> iPSCs (blue), *Gtl2*<sup>off</sup> iPSCs (red) and rescued iPSCs VA-10 (yellow). **(b)** Expression levels of tissue-specific developmental regulators. **(c)** Expression levels of imprinted genes that have been implicated in abnormal fetal growth.

**Supplemental Figure 10: Developmental potential of iPSC clone VA-10.** (a) Frequency of dead or living midgestation (E11.5) embryos obtained after blastocyst injection of Gtl2<sup>off</sup> iPSC clone #45 (green bar) and its VA-rescued derivative clone (red bar). (b) Frequency of failed pregnancies (resorptions, lower panel on the left) and completely developed but stillborn embryos (lower panel on the right) recovered after 4n blastocyst injections of the VA-rescued clone (red bars) and the parental Gtl2<sup>off</sup> iPSC line #45 (green bars).

**a**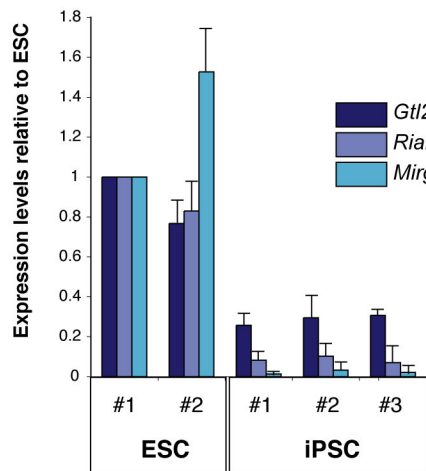**b**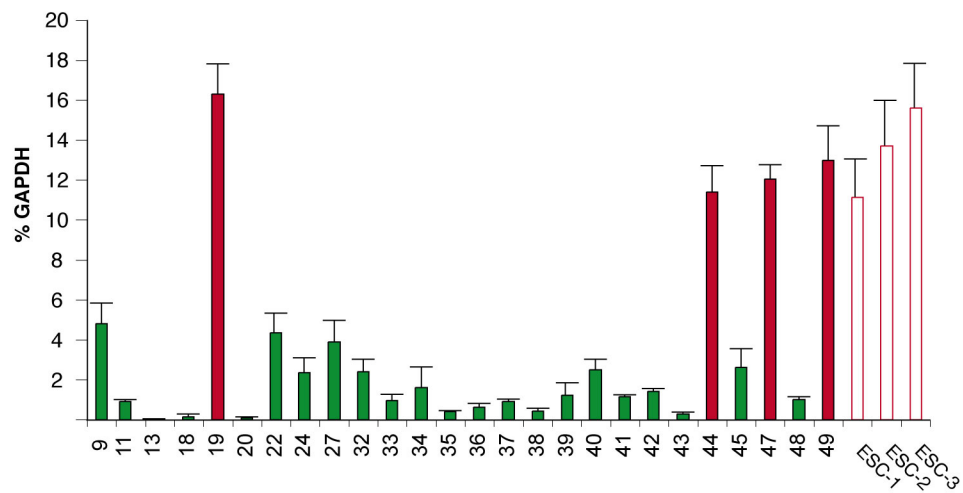**c**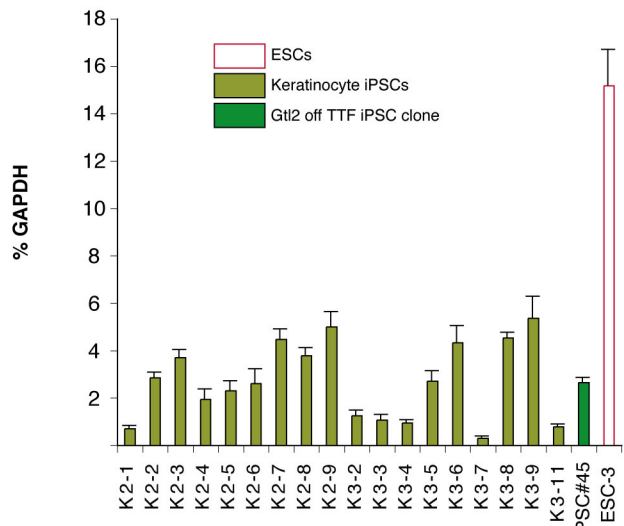**d**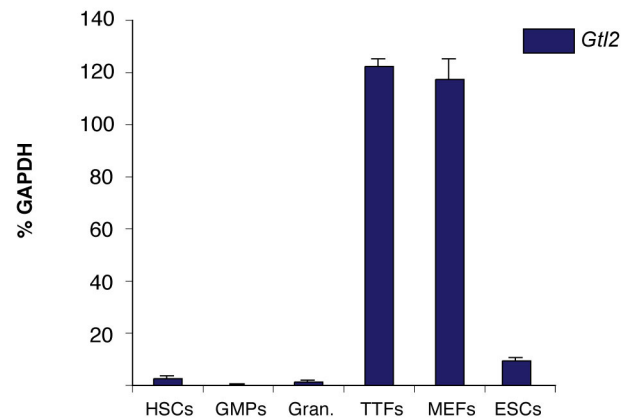

a

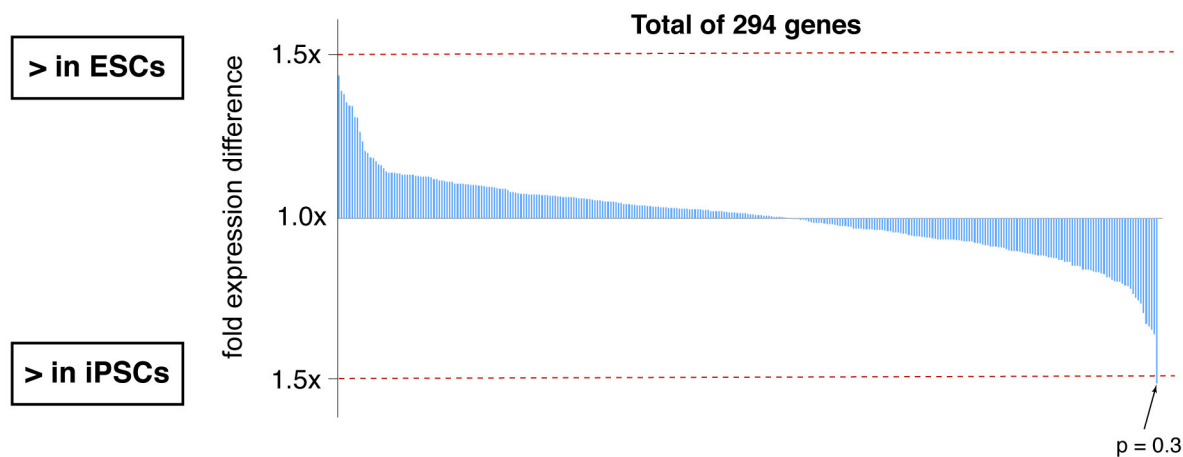

b

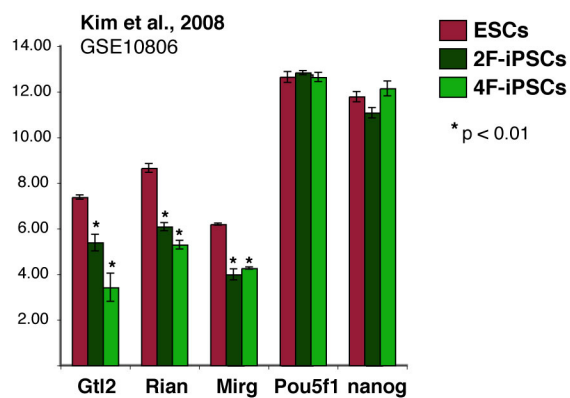

c

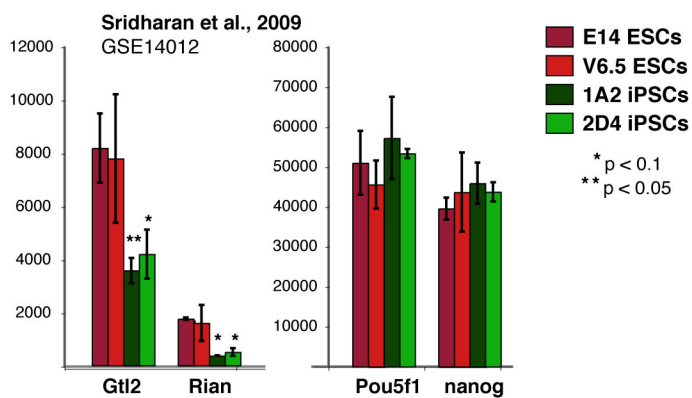

d

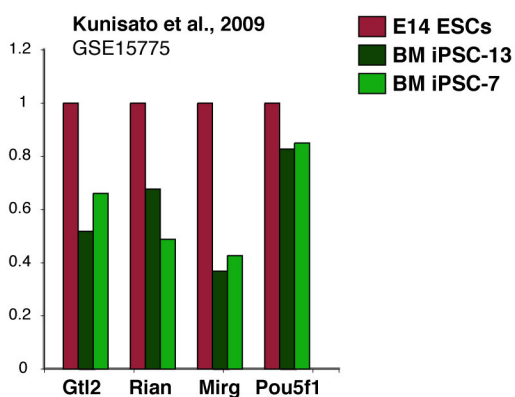

e

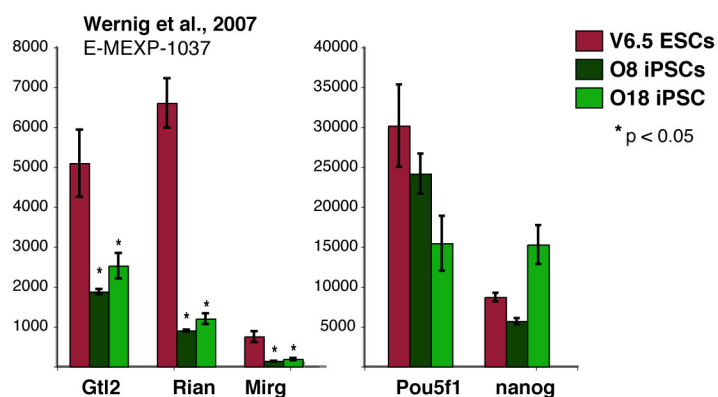

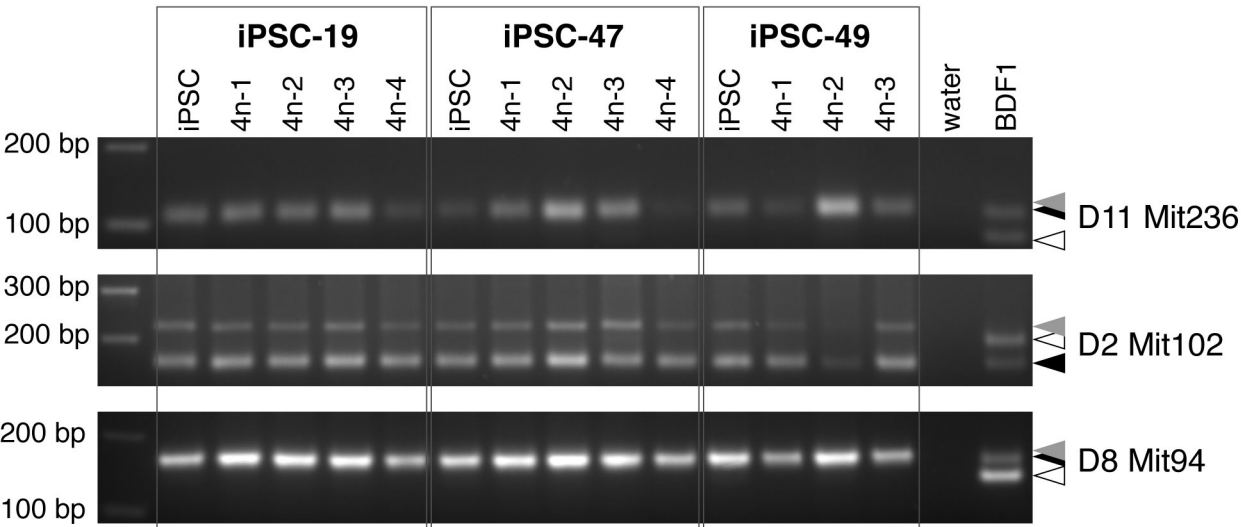



a

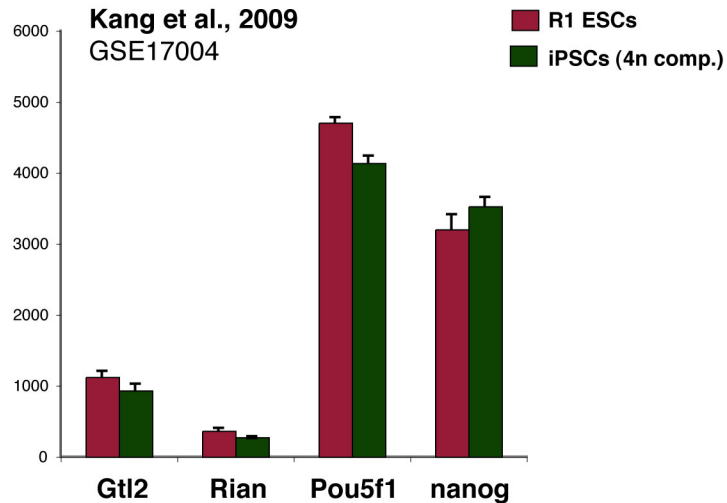

b

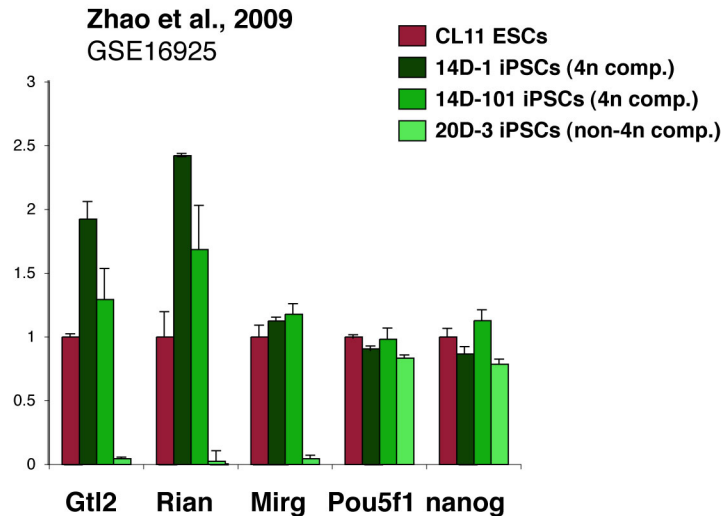

a

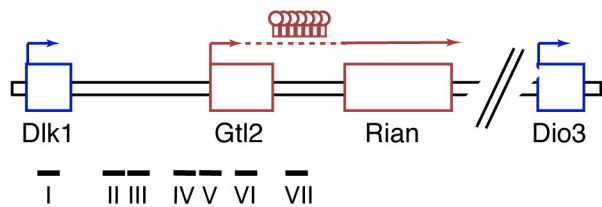

b

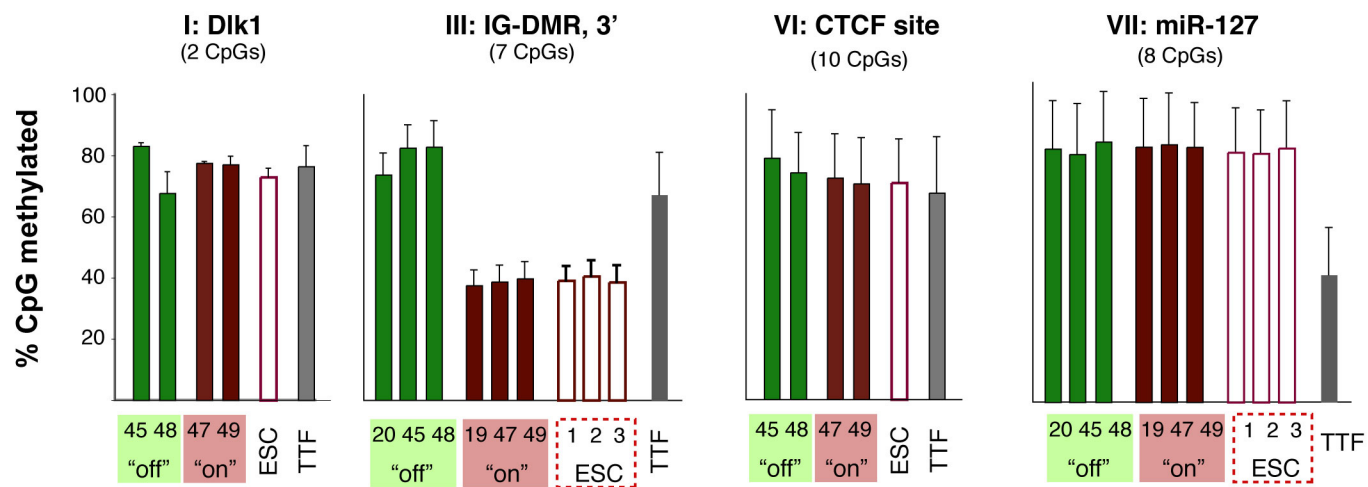

a

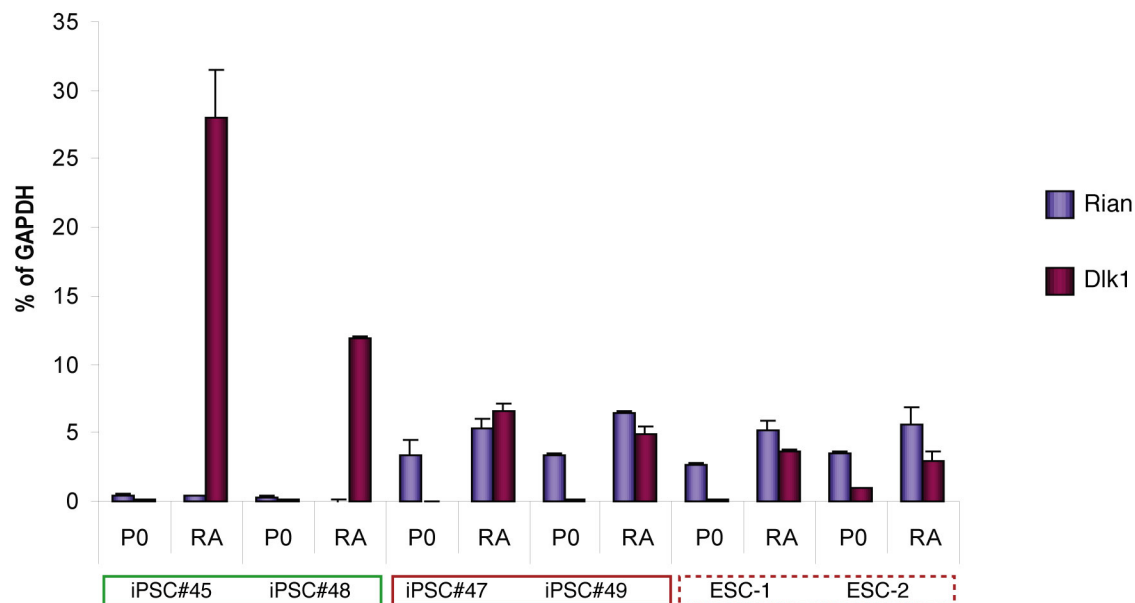

b

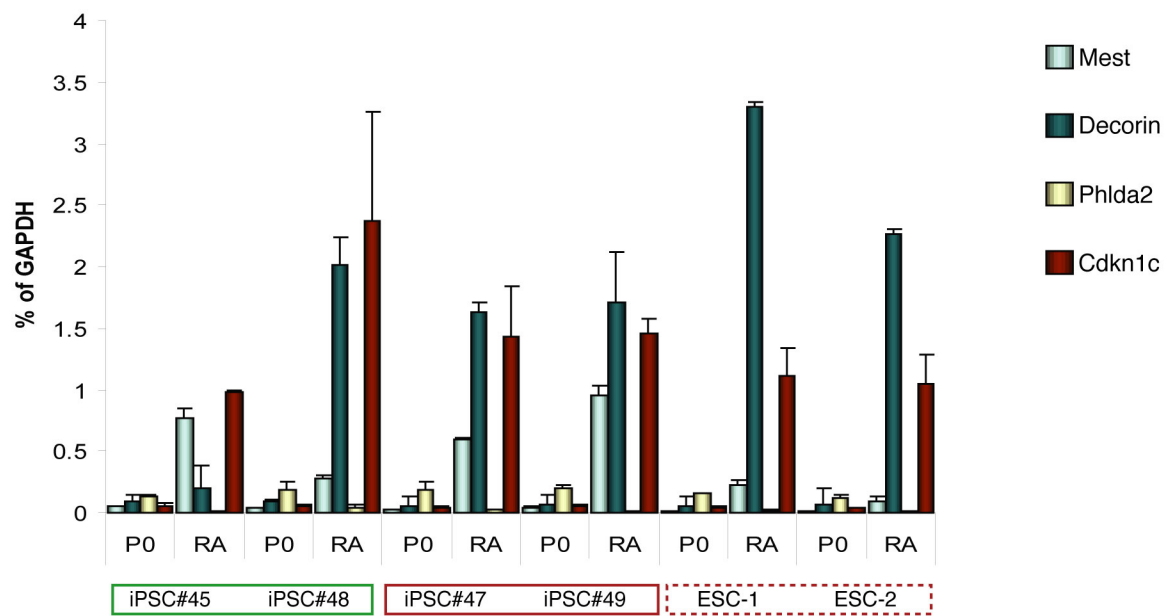



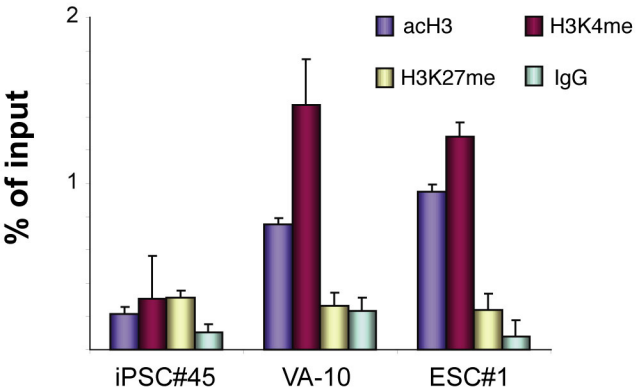

a

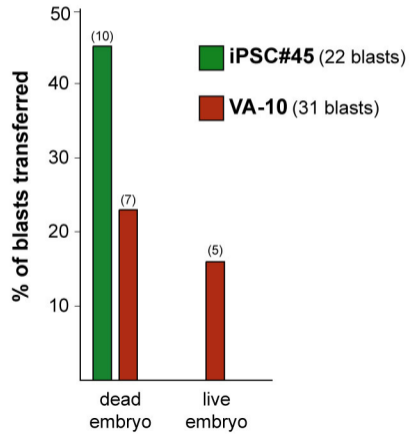

b

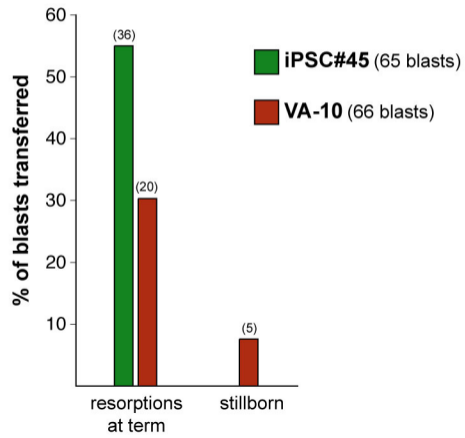

**a**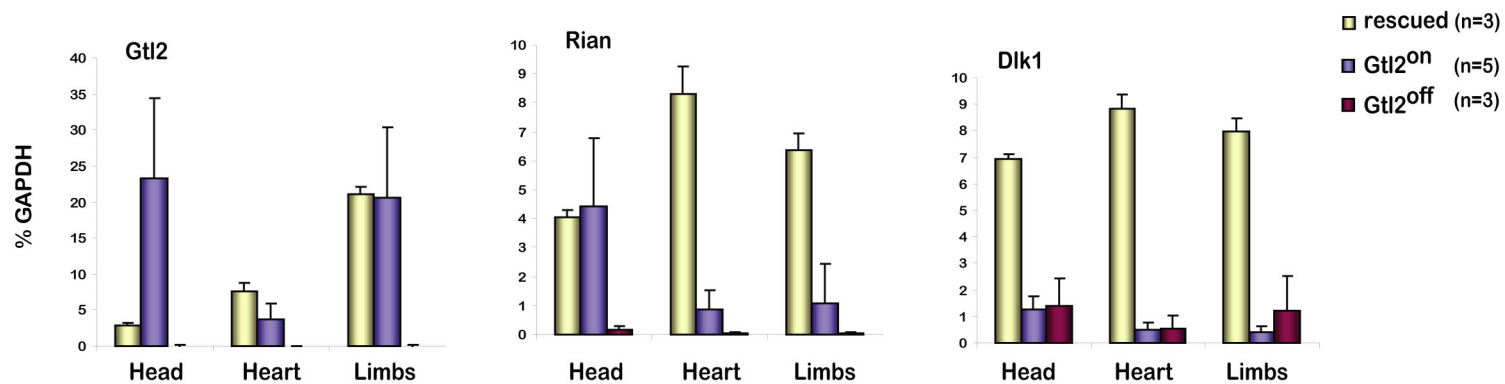**b**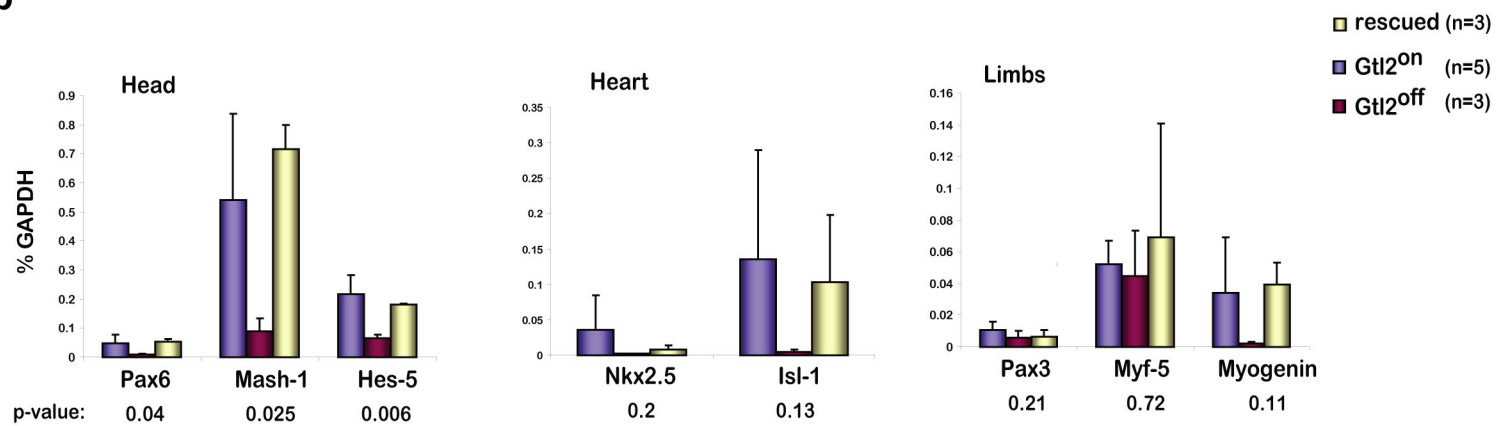**c**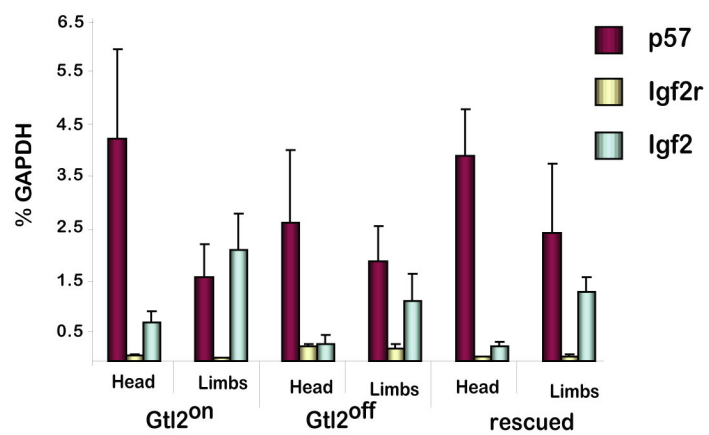

**Supplemental Table 1: 4n blastocyst injections**

| Line                    | origin | Gtl2       | Blasts transferred | Resorptions | Stillborn | liveborn (%blasts) | viable pups | adult mice |
|-------------------------|--------|------------|--------------------|-------------|-----------|--------------------|-------------|------------|
| ESC-1                   | Blast. | on         | 15                 | 7           | 0         | 3 (20%)            | 3           | 0          |
| ESC-2                   | Blast. | on         | 15                 | 2           | 0         | 2 (13%)            | 1           | 1          |
| iPSC-1                  | MEF    | off        | 45                 | 6           | 0         | 0                  | 0           | 0          |
| iPSC-2                  | MEF    | off        | 15                 | 11          | 0         | 0                  | 0           | 0          |
| iPSC-3                  | MEF    | off        | 54                 | 22          | 0         | 0                  | 0           | 0          |
| iPSC-4                  | MEF    | off        | 12                 | 8           | 0         | 0                  | 0           | 0          |
| iPSC-9                  | HSC    | off        | 20                 | 2           | 0         | 0                  | 0           | 0          |
| iPSC-12                 | HSC    | off        | 20                 | 8           | 0         | 0                  | 0           | 0          |
| iPSC-19                 | PF     | on         | 100                | 18          | 2         | 11 (11%)           | 5           | 1          |
| iPSC-20                 | PF     | off        | 33                 | 14          | 0         | 0                  | 0           | 0          |
| iPSC-44                 | TTF    | on         | 42                 | 11          | 0         | 3 (7.1%)           | 0           | 0          |
| iPSC-45                 | TTF    | off        | 65                 | 36          | 0         | 0                  | 0           | 0          |
| iPSC-46                 | TTF    | off        | 22                 | 3           | 0         | 0                  | 0           | 0          |
| iPSC-47                 | TTF    | on         | 42                 | 8           | 1         | 8 (19%)            | 2           | 2          |
| iPSC-48                 | TTF    | off        | 33                 | 10          | 0         | 0                  | 0           | 0          |
| iPSC-49                 | TTF    | on         | 44                 | 1           | 0         | 4 (9.1%)           | 0           | 0          |
| <b>Total "Gtl2 off"</b> |        | <b>off</b> | <b>319</b>         | <b>120</b>  | <b>0</b>  | <b>0</b>           | <b>0</b>    | <b>0</b>   |
| <b>Total "Gtl2 on"</b>  |        | <b>on</b>  | <b>228</b>         | <b>38</b>   | <b>3</b>  | <b>26 (11.4%)</b>  | <b>7</b>    | <b>3</b>   |



**Supplemental Table 2: Expression levels of imprinted genes in ESCs and iPSCs**

Shown are intensity values measured on an Affymetrix 430A array. If a gene was represented by more than one probeset, only the one with the highest intensity is shown. Genes with an average intensity of at least 50 in one cell type were considered detectable and are highlighted.

| Gene             | ESC1   | ESC2   | ESC3   | ESC4   | iPSC1  | iPSC2  | iPSC3  | iPSC4  | E-mean | I-mean | fold | p-value | Probe ID     |
|------------------|--------|--------|--------|--------|--------|--------|--------|--------|--------|--------|------|---------|--------------|
| <b>Mkrn1</b>     | 4125.3 | 4779.2 | 4425.3 | 4386.3 | 4297.5 | 4369.9 | 4402.5 | 4133.7 | 4429.0 | 4300.9 | 1.03 | 0.4173  | 1434853_x_at |
| <b>NM_138658</b> | 2241.9 | 2342   | 2307.8 | 2111   | 2216.8 | 1599.3 | 2137.5 | 1969.7 | 2250.7 | 1980.8 | 1.14 | 0.1148  | 1450186_s_at |
| <b>CD81</b>      | 2292.6 | 2176   | 2303   | 1776.4 | 1960.5 | 1507.6 | 2061   | 1997   | 2137.0 | 1881.5 | 1.14 | 0.1985  | 1416330_at   |
| <b>Grb10</b>     | 1764.8 | 1611.1 | 1416.1 | 1721   | 1647.2 | 1801.6 | 1870.6 | 1703.7 | 1628.3 | 1755.8 | 0.93 | 0.2165  | 1425458_a_at |
| <b>Gtl2</b>      | 1615.1 | 1512.9 | 1525.8 | 1639.8 | 291.2  | 453.1  | 353.8  | 603.4  | 1573.4 | 425.4  | 3.70 | 0.0000  | 1439380_x_at |
| <b>Snrpn</b>     | 1516.4 | 1528.1 | 1403.1 | 1528.5 | 1674.1 | 1760.1 | 1559.7 | 1353.5 | 1494.0 | 1586.9 | 0.94 | 0.3571  | 1415895_at   |
| <b>Phlda2</b>    | 978.3  | 1010.5 | 886.1  | 965.1  | 1025.5 | 1053.9 | 1055.8 | 1040.8 | 960.0  | 1044.0 | 0.92 | 0.0218  | 1417837_at   |
| <b>Sccl38a4</b>  | 1067.2 | 976.3  | 945.2  | 741    | 974.8  | 832    | 925.7  | 1076.3 | 932.4  | 952.2  | 0.98 | 0.8250  | 1448889_at   |
| <b>Nap1l4</b>    | 732.3  | 855.9  | 739.2  | 788.4  | 692.9  | 671.3  | 726.1  | 773.4  | 779.0  | 715.9  | 1.09 | 0.1320  | 1448476_at   |
| <b>H19</b>       | 670.1  | 719.7  | 1010.2 | 471.7  | 477.7  | 443.3  | 494.5  | 347.4  | 717.9  | 440.7  | 1.63 | 0.0540  | 1448194_a_at |
| <b>Ube3a</b>     | 576.3  | 550.8  | 501.7  | 581.8  | 619.7  | 412.4  | 609.1  | 539.9  | 552.7  | 545.3  | 1.01 | 0.8899  | 1416680_at   |
| <b>Commd1</b>    | 532.5  | 640.4  | 476.9  | 492.6  | 493.4  | 686.4  | 523.5  | 482.7  | 535.6  | 546.5  | 0.98 | 0.8619  | 1424122_s_at |
| <b>Dhcr7</b>     | 494.4  | 499.2  | 501.8  | 490.2  | 423.7  | 473.3  | 533.2  | 497.2  | 496.4  | 481.9  | 1.03 | 0.5521  | 1448619_at   |
| <b>Igf2r</b>     | 466    | 435.6  | 523.7  | 488.1  | 484.1  | 491.6  | 451.3  | 376.6  | 478.4  | 450.9  | 1.06 | 0.4261  | 1424112_at   |
| <b>Rian</b>      | 510.8  | 444    | 314.7  | 540.1  | 54.6   | 179.7  | 61.3   | 166.3  | 452.4  | 115.5  | 3.92 | 0.0014  | 1452899_at   |
| <b>Copg2</b>     | 394.9  | 432.9  | 415.5  | 387.2  | 384.8  | 381.1  | 417.7  | 445.3  | 407.6  | 407.2  | 1.00 | 0.9833  | 1448761_a_at |
| <b>Mcts2</b>     | 235.6  | 305.8  | 274    | 590.2  | 322    | 343.1  | 354.2  | 325    | 351.4  | 336.1  | 1.05 | 0.8566  | 1451058_at   |
| <b>Peg3</b>      | 311.2  | 287.4  | 294.3  | 324.1  | 400    | 239.3  | 417.2  | 260.5  | 304.3  | 329.3  | 0.92 | 0.6131  | 1417355_at   |
| <b>Igf2</b>      | 229.3  | 331.4  | 364.2  | 289    | 297.8  | 387    | 269.3  | 271.3  | 303.5  | 306.4  | 0.99 | 0.9453  | 1448152_at   |
| <b>Sfmbt2</b>    | 279.9  | 213    | 202.9  | 291.8  | 260.5  | 308.7  | 255.1  | 198.6  | 246.9  | 255.7  | 0.97 | 0.7919  | 1434353_at   |
| <b>Blcap</b>     | 222.3  | 255.2  | 263.6  | 215.6  | 218.6  | 209.9  | 237.6  | 276.3  | 239.2  | 235.6  | 1.02 | 0.8565  | 1420631_a_at |
| <b>Dlk1</b>      | 225    | 246.1  | 233.1  | 164.2  | 178.4  | 209.5  | 133.7  | 93.9   | 217.1  | 153.9  | 1.41 | 0.0888  | 1449939_s_at |
| <b>H13</b>       | 261.5  | 273.4  | 211.4  | 109.7  | 225.3  | 226.5  | 220.5  | 247.4  | 214.0  | 229.9  | 0.93 | 0.6878  | 1417287_at   |
| <b>Plagl1</b>    | 151.2  | 188.9  | 205.5  | 228.8  | 143.5  | 354    | 186.4  | 208.6  | 193.6  | 223.1  | 0.87 | 0.5650  | 1426208_x_at |
| <b>Tssc4</b>     | 201.4  | 174.3  | 192.4  | 203.4  | 194.5  | 217.1  | 198.8  | 214.7  | 192.9  | 206.3  | 0.94 | 0.1751  | 1427661_a_at |
| <b>Cdkn1c</b>    | 164    | 192.1  | 192.4  | 136.5  | 183.1  | 172    | 174.2  | 208.5  | 171.3  | 184.5  | 0.93 | 0.4345  | 1417649_at   |
| <b>Ndn</b>       | 154.8  | 159.3  | 155    | 191.9  | 169.4  | 205.4  | 168.7  | 169.7  | 165.3  | 178.3  | 0.93 | 0.3443  | 1435382_at   |
| <b>Zrsr1</b>     | 174.1  | 136.4  | 134.6  | 161.6  | 168.4  | 171.7  | 157.4  | 171.7  | 151.7  | 167.3  | 0.91 | 0.1788  | 1449354_at   |
| <b>Ddc</b>       | 134.4  | 170.7  | 129.2  | 165.1  | 146.9  | 183.3  | 146.2  | 141.6  | 149.9  | 154.5  | 0.97 | 0.7561  | 1426215_at   |
| <b>Ascl2</b>     | 150.4  | 160.5  | 149.9  | 90     | 116.6  | 120.9  | 111.1  | 127.6  | 137.7  | 119.1  | 1.16 | 0.3004  | 1460514_s_at |
| <b>Ampd3</b>     | 103.8  | 141.5  | 143.7  | 110.1  | 148.7  | 140.9  | 132.7  | 130.1  | 124.8  | 138.1  | 0.90 | 0.2793  | 1422573_at   |
| <b>Sgce</b>      | 119.5  | 112.3  | 123.5  | 109.2  | 119.9  | 125.8  | 99.4   | 100    | 116.1  | 111.3  | 1.04 | 0.5438  | 1420688_a_at |
| <b>Tspan32</b>   | 120.4  | 87.2   | 137.5  | 118.7  | 162.4  | 166.9  | 106.8  | 94.7   | 116.0  | 132.7  | 0.87 | 0.4631  | 1431289_at   |
| <b>AV124445</b>  | 111.3  | 107.2  | 87.2   | 117.7  | 99.3   | 121.8  | 112.6  | 102    | 105.9  | 108.9  | 0.97 | 0.7258  | 1455792_x_at |
| <b>Nnat</b>      | 182.2  | 17     | 31.6   | 190.2  | 166.4  | 194.7  | 213.4  | 52.3   | 105.3  | 156.7  | 0.67 | 0.4179  | 1423506_a_at |
| <b>Tnfrsf22</b>  | 86     | 63.5   | 100.3  | 101.9  | 105.7  | 130.7  | 86.5   | 92.8   | 87.9   | 103.9  | 0.85 | 0.2716  | 1426095_a_at |
| <b>Ins1</b>      | 56.1   | 77.5   | 100    | 96.7   | 97.7   | 104.4  | 81.9   | 121.8  | 82.6   | 101.5  | 0.81 | 0.1987  | 1422447_at   |
| <b>Sc122a18</b>  | 93.8   | 76.9   | 101.9  | 46.8   | 59.5   | 72.4   | 28.3   | 23.8   | 79.9   | 46.0   | 1.74 | 0.0935  | 1427531_a_at |

|                 |      |      |       |      |      |      |      |      |      |      |      |        |              |
|-----------------|------|------|-------|------|------|------|------|------|------|------|------|--------|--------------|
| <b>Casd1</b>    | 65.3 | 72   | 68.3  | 76.1 | 60.4 | 69.7 | 74.5 | 84.3 | 70.4 | 72.2 | 0.98 | 0.7545 | 1451980_at   |
| <b>Gnas</b>     | 62   | 54.5 | 85.7  | 68.4 | 74.7 | 52.3 | 75.1 | 47.1 | 67.7 | 62.3 | 1.09 | 0.6089 | 1453413_at   |
| <b>Kcnq1</b>    | 45   | 52.6 | 115.2 | 56.9 | 33   | 70.7 | 26.4 | 29.3 | 67.4 | 39.9 | 1.69 | 0.2002 | 1449464_at   |
| <b>Dcn</b>      | 41.7 | 63.8 | 85.2  | 56.9 | 9.1  | 45.5 | 59.7 | 42.5 | 61.9 | 39.2 | 1.58 | 0.1564 | 1449368_at   |
| <b>Atp10a</b>   | 57   | 59.2 | 48.9  | 77.5 | 71.9 | 86.5 | 70.9 | 85.1 | 60.7 | 78.6 | 0.77 | 0.0501 | 1447272_s_at |
| <b>Tnfrsf23</b> | 54.3 | 45.6 | 70.5  | 44   | 59.4 | 68.7 | 48.8 | 55.6 | 53.6 | 58.1 | 0.92 | 0.5610 | 1422101_at   |
| <b>Mest</b>     | 40.7 | 46.5 | 51.3  | 50.5 | 51   | 81.7 | 57   | 55.3 | 47.3 | 61.3 | 0.77 | 0.1052 | 1423294_at   |
| <b>Magel2</b>   | 25.4 | 35.1 | 51.4  | 40.7 | 51.3 | 54.4 | 51.9 | 50.5 | 38.2 | 52.0 | 0.73 | 0.0450 | 1417217_at   |
| <b>Th</b>       | 42.3 | 26.5 | 47.3  | 42.8 | 58.8 | 40.7 | 33.1 | 37.8 | 39.7 | 42.6 | 0.93 | 0.7047 | 1420546_at   |
| <b>Pon3</b>     | 31.9 | 37.7 | 48.9  | 30.2 | 29.7 | 29.1 | 16.5 | 26.8 | 37.2 | 25.5 | 1.46 | 0.0673 | 1419298_at   |
| <b>Usp29</b>    | 36.7 | 23.5 | 44.5  | 43.2 | 14.2 | 36.7 | 14.2 | 31.8 | 37.0 | 24.2 | 1.53 | 0.1439 | 1427551_at   |
| <b>Rasgrf1</b>  | 31.7 | 33.8 | 43.7  | 37.9 | 30.6 | 30.7 | 14   | 35.4 | 36.8 | 27.7 | 1.33 | 0.1421 | 1435614_s_at |
| <b>Gatm</b>     | 42.9 | 38.1 | 23.3  | 37.6 | 34.5 | 26.1 | 40.2 | 27.8 | 35.5 | 32.2 | 1.10 | 0.5555 | 1423569_at   |
| <b>Ins2</b>     | 37.4 | 26.4 | 11.4  | 24.9 | 32.3 | 30.3 | 11.5 | 12.9 | 25.0 | 21.8 | 1.15 | 0.6848 | 1422446_x_at |
| <b>Xlr3a</b>    | 18.5 | 31.1 | 4.3   | 28.7 | 21   | 96.9 | 33.6 | 38.9 | 20.7 | 47.6 | 0.43 | 0.1834 | 1420357_s_at |
| <b>Dlx5</b>     | 19   | 14.9 | 27.3  | 21.3 | 25.5 | 18.5 | 14.6 | 11.8 | 20.6 | 17.6 | 1.17 | 0.4718 | 1449863_a_at |
| <b>Slc22a2</b>  | 12.1 | 12.3 | 30.3  | 14.5 | 29.6 | 24.8 | 10   | 18.1 | 17.3 | 20.6 | 0.84 | 0.6052 | 1419117_at   |
| <b>Xlr4b</b>    | 14.3 | 20.1 | 21.2  | 8.9  | 20.1 | 65.1 | 13.3 | 12.6 | 16.1 | 27.8 | 0.58 | 0.4004 | 1449347_a_at |
| <b>Zim1</b>     | 21.5 | 10.2 | 14.1  | 17.6 | 1.3  | 33.8 | 24.5 | 17.7 | 15.9 | 19.3 | 0.82 | 0.6495 | 1421405_at   |
| <b>Ccl19</b>    | 34.4 | 9    | 12.9  | 5.8  | 6.5  | 14.4 | 6.7  | 5.1  | 15.5 | 8.2  | 1.90 | 0.3207 | 1449277_at   |
| <b>Slc22a3</b>  | 11.5 | 17.9 | 22.8  | 9.8  | 18.5 | 19.6 | 6.8  | 2.4  | 15.5 | 11.8 | 1.31 | 0.5076 | 1420444_at   |
| <b>Osbp15</b>   | 9.3  | 12.1 | 27.3  | 6.8  | 8.1  | 6.8  | 19   | 10.6 | 13.9 | 11.1 | 1.25 | 0.6261 | 1425391_a_at |
| <b>Tfpi2</b>    | 10.9 | 13.7 | 11.4  | 10.6 | 14.7 | 12.3 | 8.5  | 9.9  | 11.7 | 11.4 | 1.03 | 0.8515 | 1418547_at   |
| <b>Calcr</b>    | 15.6 | 16.3 | 7.6   | 3.1  | 21.2 | 17.7 | 13.5 | 22.3 | 10.7 | 18.7 | 0.57 | 0.0770 | 1418688_at   |
| <b>Pon2</b>     | 7.6  | 1.3  | 1.8   | 9.2  | 10.8 | 3    | 1    | 8    | 5.0  | 5.7  | 0.87 | 0.8179 | 1450686_at   |
| <b>Asb4</b>     | 5.1  | 2.7  | 3.4   | 3    | 15.8 | 17.1 | 2.3  | 2.2  | 3.6  | 9.4  | 0.38 | 0.2110 | 1433919_at   |





**Supplemental Table 3: miRNA profiling of KH2-OKSM ESCs and iPSCs**

| miRNA          | ESC1   | ESC2   | ESC3   | ESC4   | iPSC1  | iPSC2  | iPSC3  | iPSC4  | E-mean | I-mean | fold       | p-value | 12qF1 |
|----------------|--------|--------|--------|--------|--------|--------|--------|--------|--------|--------|------------|---------|-------|
| mmu-miR-541    | 1.338  | 1.380  | 1.228  | 1.401  | -1.943 | -1.260 | -1.990 | -0.381 | 1.34   | -1.39  | <b>6.6</b> | 0.0043  | yes   |
| mmu-miR-376b   | 1.270  | 1.322  | 1.254  | 1.263  | -1.828 | -1.347 | -1.930 | -0.499 | 1.28   | -1.40  | <b>6.4</b> | 0.0038  | yes   |
| mmu-miR-495    | 1.087  | 1.224  | 1.111  | 1.139  | -1.591 | -1.171 | -1.778 | -0.467 | 1.14   | -1.25  | <b>5.2</b> | 0.0034  | yes   |
| mmu-miR-411*   | 1.111  | 1.385  | 1.226  | 1.247  | -1.466 | -1.035 | -1.670 | -0.399 | 1.24   | -1.14  | <b>5.2</b> | 0.0029  | yes   |
| mmu-miR-376a   | 1.367  | 1.280  | 1.185  | 1.280  | -1.371 | -0.879 | -1.521 | -0.439 | 1.28   | -1.05  | <b>5.0</b> | 0.0024  | yes   |
| mmu-miR-409-3p | 1.144  | 1.278  | 1.221  | 1.231  | -1.412 | -1.127 | -1.426 | -0.407 | 1.22   | -1.09  | <b>5.0</b> | 0.0021  | yes   |
| mmu-miR-410    | 1.040  | 1.070  | 0.983  | 1.099  | -1.477 | -1.056 | -1.561 | -0.466 | 1.05   | -1.14  | <b>4.6</b> | 0.0024  | yes   |
| mmu-miR-377    | 1.168  | 1.193  | 1.150  | 1.219  | -1.290 | -0.891 | -1.408 | -0.276 | 1.18   | -0.97  | <b>4.4</b> | 0.0030  | yes   |
| mmu-miR-369-3p | 1.177  | 1.315  | 1.214  | 1.153  | -1.171 | -0.918 | -1.167 | -0.255 | 1.21   | -0.88  | <b>4.3</b> | 0.0028  | yes   |
| mmu-miR-376c   | 0.606  | 1.075  | 0.987  | 0.756  | -1.467 | -1.195 | -1.621 | -0.622 | 0.86   | -1.23  | <b>4.2</b> | 0.0040  | yes   |
| mmu-miR-127    | 1.259  | 1.171  | 1.063  | 1.208  | -0.930 | -0.576 | -1.125 | -0.305 | 1.18   | -0.73  | <b>3.8</b> | 0.0015  | yes   |
| mmu-miR-379    | 1.059  | 1.231  | 1.097  | 1.220  | -0.950 | -0.547 | -1.225 | -0.240 | 1.15   | -0.74  | <b>3.7</b> | 0.0019  | yes   |
| mmu-miR-434-3p | 0.894  | 0.954  | 0.873  | 0.921  | -0.925 | -0.614 | -1.041 | -0.408 | 0.91   | -0.75  | <b>3.2</b> | 0.0011  | yes   |
| mmu-miR-411    | 0.738  | 1.049  | 0.936  | 0.792  | -0.879 | -0.698 | -1.131 | -0.376 | 0.88   | -0.77  | <b>3.1</b> | 0.0030  | yes   |
| mmu-miR-136    | 1.217  | 1.217  | 1.211  | 1.324  | -0.376 | -0.194 | -0.627 | 0.162  | 1.24   | -0.26  | <b>2.8</b> | 0.0018  | yes   |
| mmu-miR-127*   | 0.436  | 0.561  | 0.437  | 0.467  | -0.987 | -0.804 | -1.102 | -0.607 | 0.48   | -0.87  | <b>2.5</b> | 0.0008  | yes   |
| mmu-miR-434-5p | 0.726  | 0.866  | 0.756  | 0.825  | -0.619 | -0.435 | -0.819 | -0.268 | 0.79   | -0.54  | <b>2.5</b> | 0.0009  | yes   |
| mmu-miR-323-3p | 0.256  | 0.453  | 0.318  | 0.264  | -0.878 | -0.916 | -1.012 | -0.572 | 0.32   | -0.84  | <b>2.2</b> | 0.0024  | yes   |
| mmu-miR-300    | 0.671  | 0.631  | 0.651  | 0.583  | -0.486 | -0.468 | -0.438 | -0.229 | 0.63   | -0.41  | <b>2.1</b> | 0.0009  | yes   |
| mmu-miR-154*   | 0.353  | 0.580  | 0.466  | 0.446  | -0.590 | -0.698 | -0.676 | -0.345 | 0.46   | -0.58  | <b>2.1</b> | 0.0023  | yes   |
| mmu-miR-329    | 0.696  | 0.722  | 0.618  | 0.753  | -0.439 | -0.249 | -0.391 | -0.107 | 0.70   | -0.30  | <b>2.0</b> | 0.0004  | yes   |
| mmu-miR-382    | 0.708  | 0.562  | 0.538  | 0.687  | -0.409 | -0.223 | -0.233 | -0.075 | 0.62   | -0.23  | <b>1.8</b> | 0.0021  | yes   |
| mmu-miR-142-3p | 0.646  | 0.855  | 0.940  | 0.361  | -0.372 | 0.082  | -0.379 | 0.084  | 0.70   | -0.15  | <b>1.8</b> | 0.0311  |       |
| mmu-miR-337-3p | 0.468  | 0.674  | 0.634  | 0.521  | -0.312 | -0.198 | -0.335 | -0.053 | 0.57   | -0.22  | <b>1.7</b> | 0.0025  | yes   |
| mmu-miR-200c   | 0.265  | 0.556  | 0.495  | 0.396  | -0.279 | -0.390 | -0.285 | -0.245 | 0.43   | -0.30  | <b>1.7</b> | 0.0036  |       |
| mmu-miR-142-5p | 0.448  | 0.595  | 0.589  | 0.147  | -0.430 | -0.079 | -0.433 | -0.167 | 0.44   | -0.28  | <b>1.6</b> | 0.0182  |       |
| mmu-miR-141    | 0.311  | 0.651  | 0.670  | 0.447  | -0.215 | -0.242 | -0.189 | -0.084 | 0.52   | -0.18  | <b>1.6</b> | 0.0060  |       |
| mmu-miR-299*   | 0.402  | 0.708  | 0.600  | 0.488  | -0.183 | -0.090 | -0.161 | 0.004  | 0.55   | -0.11  | <b>1.6</b> | 0.0030  |       |
| mmu-miR-135b   | 0.575  | 0.754  | 0.704  | 0.469  | 0.061  | 0.441  | -0.191 | 0.003  | 0.63   | 0.08   | <b>1.5</b> | 0.0216  |       |
| mmu-miR-665    | 0.582  | 0.518  | 0.599  | 0.588  | 0.056  | -0.057 | 0.142  | 0.100  | 0.57   | 0.06   | <b>1.4</b> | 0.0003  | yes   |
| mmu-miR-136*   | -0.025 | 0.181  | -0.007 | -0.008 | -0.400 | -0.427 | -0.539 | -0.313 | 0.04   | -0.42  | <b>1.4</b> | 0.0073  |       |
| mmu-miR-467b   | 0.208  | 0.319  | 0.413  | 0.412  | -0.067 | -0.150 | -0.089 | -0.090 | 0.34   | -0.10  | <b>1.4</b> | 0.0041  |       |
| mmu-miR-363    | 0.066  | 0.344  | 0.402  | 0.221  | -0.060 | 0.015  | -0.297 | -0.140 | 0.26   | -0.12  | <b>1.3</b> | 0.0497  |       |
| mmu-miR-381    | 0.164  | 0.122  | 0.189  | 0.055  | -0.208 | -0.351 | -0.123 | -0.191 | 0.13   | -0.22  | <b>1.3</b> | 0.0054  | yes   |
| mmu-miR-487b   | -0.130 | -0.026 | -0.051 | -0.064 | -0.494 | -0.307 | -0.527 | -0.331 | -0.07  | -0.41  | <b>1.3</b> | 0.0055  | yes   |
| mmu-miR-341    | 0.306  | 0.274  | 0.315  | 0.344  | -0.121 | -0.104 | 0.018  | 0.057  | 0.31   | -0.04  | <b>1.3</b> | 0.0019  | yes   |

|                   |        |        |        |        |        |        |        |        |       |       |     |        |     |
|-------------------|--------|--------|--------|--------|--------|--------|--------|--------|-------|-------|-----|--------|-----|
| mmu-miR-1193      | 0.102  | 0.202  | 0.310  | 0.160  | -0.161 | -0.277 | -0.090 | -0.065 | 0.19  | -0.15 | 1.3 | 0.0103 | yes |
| mmu-miR-18b       | 0.176  | 0.407  | 0.385  | 0.242  | 0.025  | 0.175  | -0.219 | -0.057 | 0.30  | -0.02 | 1.2 | 0.0473 |     |
| mmu-miR-466a-3p/m | 0.257  | 0.187  | 0.245  | 0.339  | 0.049  | -0.158 | -0.144 | 0.020  | 0.26  | -0.06 | 1.2 | 0.0038 |     |
| mmu-miR-467a      | -0.161 | 0.027  | 0.004  | 0.012  | -0.281 | -0.424 | -0.352 | -0.312 | -0.03 | -0.34 | 1.2 | 0.0207 |     |
| mmu-miR-20b*      | 0.100  | 0.118  | 0.072  | 0.158  | -0.204 | -0.065 | -0.292 | -0.218 | 0.11  | -0.19 | 1.2 | 0.0061 |     |
| mmu-miR-466b-3-3p | 0.199  | 0.199  | 0.194  | 0.284  | 0.021  | -0.216 | -0.135 | -0.018 | 0.22  | -0.09 | 1.2 | 0.0084 |     |
| mmu-miR-494       | 0.080  | 0.063  | 0.038  | 0.053  | -0.145 | -0.311 | -0.178 | -0.281 | 0.06  | -0.23 | 1.2 | 0.0054 | yes |
| mmu-miR-195       | -0.172 | -0.023 | -0.098 | -0.166 | -0.440 | -0.382 | -0.509 | -0.262 | -0.11 | -0.40 | 1.2 | 0.0263 |     |
| mmu-miR-412       | -0.198 | -0.049 | -0.091 | -0.074 | -0.494 | -0.292 | -0.435 | -0.315 | -0.10 | -0.38 | 1.2 | 0.0015 | yes |
| mmu-miR-190       | NA     | 0.364  | 0.311  | NA     | 0.092  | 0.097  | -0.080 | 0.124  | 0.34  | 0.06  | 1.2 | 0.1192 |     |
| mmu-miR-708       | -0.341 | -0.048 | -0.146 | -0.268 | -0.374 | -0.314 | -0.521 | -0.675 | -0.20 | -0.47 | 1.2 | 0.0496 |     |
| mmu-miR-669f      | 0.433  | 0.309  | 0.287  | 0.400  | 0.162  | -0.010 | 0.086  | 0.125  | 0.36  | 0.09  | 1.2 | 0.0016 |     |
| mmu-miR-200a      | -0.044 | 0.252  | 0.274  | 0.142  | -0.141 | 0.024  | -0.252 | -0.016 | 0.16  | -0.10 | 1.2 | 0.0763 |     |
| hsa_SNORD2        | -0.193 | 0.032  | -0.017 | -0.111 | -0.280 | -0.272 | -0.385 | -0.319 | -0.07 | -0.31 | 1.2 | 0.0290 |     |
| mmu-miR-467e      | 0.139  | 0.194  | 0.208  | 0.345  | 0.036  | -0.098 | 0.039  | -0.050 | 0.22  | -0.02 | 1.2 | 0.0345 |     |
| mmu-miR-297a      | 0.209  | 0.226  | 0.264  | 0.375  | 0.075  | -0.082 | 0.116  | 0.037  | 0.27  | 0.04  | 1.2 | 0.0224 |     |
| mmu-miR-467a*/mmu | 0.368  | 0.108  | 0.198  | 0.300  | 0.072  | -0.135 | 0.041  | 0.081  | 0.24  | 0.01  | 1.2 | 0.0042 |     |
| mmu-miR-96        | -0.104 | 0.177  | 0.050  | -0.168 | -0.263 | -0.277 | -0.354 | -0.056 | -0.01 | -0.24 | 1.2 | 0.1805 |     |
| mmu-miR-669a      | 0.318  | 0.212  | 0.250  | 0.435  | 0.171  | 0.037  | 0.111  | -0.005 | 0.30  | 0.08  | 1.2 | 0.0520 |     |
| mmu-miR-466d-3p   | 0.243  | 0.121  | 0.133  | 0.222  | 0.049  | -0.107 | -0.115 | -0.003 | 0.18  | -0.04 | 1.2 | 0.0003 |     |
| mmu-miR-467c      | -0.076 | 0.000  | 0.109  | 0.137  | -0.141 | -0.190 | -0.190 | -0.183 | 0.04  | -0.18 | 1.2 | 0.0337 |     |
| mmu-miR-19b       | 0.163  | 0.193  | 0.149  | 0.163  | -0.026 | 0.069  | -0.140 | -0.064 | 0.17  | -0.04 | 1.2 | 0.0092 |     |
| mmu-miR-19a       | -0.013 | 0.142  | 0.128  | 0.136  | -0.075 | -0.016 | -0.220 | -0.098 | 0.10  | -0.10 | 1.1 | 0.0450 |     |
| mmu-miR-32        | -0.135 | 0.184  | 0.252  | 0.008  | -0.232 | -0.032 | -0.393 | 0.167  | 0.08  | -0.12 | 1.1 | 0.3194 |     |
| mmu-miR-485*      | 0.115  | 0.145  | 0.135  | 0.152  | -0.077 | -0.066 | -0.089 | -0.013 | 0.14  | -0.06 | 1.1 | 0.0006 | yes |
| mmu-miR-466g      | 0.048  | -0.070 | -0.050 | 0.121  | -0.111 | -0.280 | -0.133 | -0.201 | 0.01  | -0.18 | 1.1 | 0.0306 |     |
| mmu-miR-466h      | 0.393  | 0.248  | 0.299  | 0.451  | 0.179  | 0.085  | 0.251  | 0.176  | 0.35  | 0.17  | 1.1 | 0.0359 |     |
| mmu-miR-200b      | 0.006  | 0.188  | 0.127  | 0.121  | -0.066 | -0.042 | -0.096 | 0.007  | 0.11  | -0.05 | 1.1 | 0.0270 |     |
| mmu-miR-101a      | -0.043 | 0.190  | 0.198  | 0.091  | -0.122 | 0.040  | -0.179 | 0.055  | 0.11  | -0.05 | 1.1 | 0.1257 |     |
| mmu-miR-470       | 0.049  | 0.052  | 0.030  | 0.041  | -0.135 | -0.185 | -0.054 | -0.076 | 0.04  | -0.11 | 1.1 | 0.0201 |     |
| mmu-miR-672       | 0.170  | 0.056  | 0.086  | 0.145  | -0.105 | -0.072 | -0.044 | 0.093  | 0.11  | -0.03 | 1.1 | 0.0517 |     |
| mmu-miR-770-3p    | 0.147  | 0.175  | 0.192  | 0.149  | 0.027  | -0.046 | 0.119  | -0.003 | 0.17  | 0.02  | 1.1 | 0.0197 | yes |
| mmu-miR-20b       | -0.093 | 0.381  | 0.342  | 0.057  | 0.106  | 0.214  | -0.211 | 0.018  | 0.17  | 0.03  | 1.1 | 0.4408 |     |
| mmu-miR-130a      | -0.049 | 0.069  | 0.037  | -0.030 | -0.130 | -0.114 | -0.224 | -0.034 | 0.01  | -0.13 | 1.1 | 0.1011 |     |
| mmu-miR-99b       | -0.163 | -0.161 | -0.193 | -0.134 | -0.268 | -0.197 | -0.322 | -0.376 | -0.16 | -0.29 | 1.1 | 0.0577 |     |
| mmu-miR-467b*     | 0.134  | -0.031 | -0.054 | 0.052  | -0.091 | -0.117 | -0.133 | -0.069 | 0.03  | -0.10 | 1.1 | 0.0325 |     |
| mmu-miR-291b-3p   | -0.255 | 0.087  | 0.038  | -0.310 | -0.263 | -0.239 | -0.353 | -0.089 | -0.11 | -0.24 | 1.1 | 0.4437 |     |
| mmu-miR-126-3p    | -0.283 | 0.097  | -0.014 | -0.248 | -0.207 | -0.201 | -0.358 | -0.160 | -0.11 | -0.23 | 1.1 | 0.3820 |     |
| mmu-miR-668       | -0.035 | -0.041 | -0.167 | -0.174 | -0.249 | -0.056 | -0.278 | -0.293 | -0.10 | -0.22 | 1.1 | 0.0673 |     |

|                   |        |        |        |        |        |        |        |        |       |       |     |        |     |
|-------------------|--------|--------|--------|--------|--------|--------|--------|--------|-------|-------|-----|--------|-----|
| mmu-miR-429       | -0.059 | 0.151  | 0.114  | 0.120  | -0.108 | 0.032  | -0.064 | 0.008  | 0.08  | -0.03 | 1.1 | 0.0226 | yes |
| mmu-miR-666-5p    | -0.462 | -0.487 | NA     | NA     | -0.527 | -0.683 | -0.553 | -0.590 | -0.47 | -0.59 | 1.1 | 0.2953 |     |
| mmu-miR-690       | -0.228 | -0.092 | -0.185 | -0.225 | -0.251 | -0.250 | -0.357 | -0.326 | -0.18 | -0.30 | 1.1 | 0.0436 |     |
| mmu-miR-92b       | 0.080  | 0.089  | 0.069  | 0.194  | -0.051 | 0.050  | -0.028 | 0.009  | 0.11  | -0.01 | 1.1 | 0.0343 |     |
| mmu-miR-712       | 0.188  | 0.082  | 0.071  | 0.040  | 0.041  | 0.021  | -0.057 | -0.076 | 0.10  | -0.02 | 1.1 | 0.0088 |     |
| mmu-miR-301b      | -0.279 | -0.016 | 0.026  | -0.071 | -0.163 | -0.527 | -0.216 | 0.115  | -0.09 | -0.20 | 1.1 | 0.5389 |     |
| mmu-miR-18a       | -0.145 | -0.005 | -0.068 | -0.089 | -0.158 | -0.209 | -0.284 | -0.106 | -0.08 | -0.19 | 1.1 | 0.1407 |     |
| mmu-miR-183       | -0.090 | 0.092  | 0.027  | -0.103 | -0.143 | -0.225 | -0.152 | 0.005  | -0.02 | -0.13 | 1.1 | 0.3097 |     |
| mmu-miR-182       | 0.016  | 0.180  | 0.108  | -0.043 | -0.056 | -0.149 | -0.091 | 0.116  | 0.07  | -0.04 | 1.1 | 0.3675 |     |
| mmu-miR-92a       | 0.176  | 0.149  | 0.090  | 0.173  | -0.038 | 0.158  | -0.002 | 0.036  | 0.15  | 0.04  | 1.1 | 0.1019 |     |
| mmu-miR-181c      | -0.562 | -0.223 | -0.320 | -0.504 | -0.476 | -0.668 | -0.573 | -0.318 | -0.40 | -0.51 | 1.1 | 0.5209 |     |
| mmu-miR-15a       | 0.029  | 0.098  | 0.141  | 0.027  | -0.063 | 0.009  | -0.132 | 0.076  | 0.07  | -0.03 | 1.1 | 0.2244 |     |
| mmu-miR-207       | 0.085  | 0.135  | 0.131  | 0.209  | 0.040  | 0.088  | -0.038 | 0.068  | 0.14  | 0.04  | 1.1 | 0.0514 |     |
| mmu-miR-1959      | 0.028  | 0.063  | -0.006 | -0.004 | -0.116 | 0.011  | -0.153 | -0.023 | 0.02  | -0.07 | 1.1 | 0.0700 |     |
| mmu-miR-297c      | 0.092  | 0.099  | 0.041  | 0.168  | 0.058  | -0.023 | 0.025  | -0.020 | 0.10  | 0.01  | 1.1 | 0.1101 |     |
| SNORD38B-5        | -0.220 | 0.017  | -0.020 | -0.153 | -0.190 | -0.108 | -0.275 | -0.163 | -0.09 | -0.18 | 1.1 | 0.2553 |     |
| mmu-miR-125a-5p   | -0.157 | -0.099 | -0.128 | -0.117 | -0.181 | -0.085 | -0.262 | -0.331 | -0.13 | -0.21 | 1.1 | 0.1842 |     |
| mmu-miR-467f      | 0.314  | -0.003 | 0.031  | 0.166  | 0.053  | -0.019 | 0.098  | 0.031  | 0.13  | 0.04  | 1.1 | 0.3124 |     |
| mmu-miR-1186      | -0.035 | 0.158  | 0.092  | 0.082  | 0.044  | -0.079 | -0.051 | 0.043  | 0.07  | -0.01 | 1.1 | 0.2978 |     |
| mmu-miR-148a      | 0.029  | 0.095  | 0.054  | 0.090  | -0.079 | -0.014 | -0.071 | 0.091  | 0.07  | -0.02 | 1.1 | 0.0607 |     |
| mmu-miR-1274a     | -0.010 | 0.017  | -0.046 | 0.040  | -0.074 | -0.030 | -0.130 | -0.104 | 0.00  | -0.08 | 1.1 | 0.0274 |     |
| hsa_SNORD12       | -0.112 | -0.055 | -0.134 | -0.156 | -0.198 | -0.201 | -0.203 | -0.188 | -0.11 | -0.20 | 1.1 | 0.0396 |     |
| mmu-miR-293       | 0.041  | 0.217  | 0.213  | 0.106  | 0.042  | 0.090  | -0.050 | 0.163  | 0.14  | 0.06  | 1.1 | 0.3288 |     |
| mmu-miR-691       | -0.273 | -0.109 | -0.259 | -0.346 | -0.201 | -0.387 | -0.384 | -0.339 | -0.25 | -0.33 | 1.1 | 0.3728 |     |
| mmu-miR-467g      | 0.315  | 0.049  | 0.076  | 0.162  | 0.051  | -0.022 | 0.150  | 0.098  | 0.15  | 0.07  | 1.1 | 0.3283 |     |
| mmu-miR-582-3p    | -0.085 | -0.212 | -0.257 | -0.092 | -0.250 | -0.116 | -0.279 | -0.302 | -0.16 | -0.24 | 1.1 | 0.3583 |     |
| mmu-miR-466f-3p   | 0.199  | 0.034  | 0.068  | 0.154  | 0.049  | -0.007 | 0.065  | 0.054  | 0.11  | 0.04  | 1.1 | 0.1082 |     |
| mmu-miR-466i      | 0.195  | -0.010 | 0.005  | 0.149  | 0.026  | -0.039 | 0.055  | 0.004  | 0.08  | 0.01  | 1.1 | 0.2480 |     |
| mmu-miR-467e*     | 0.348  | 0.109  | 0.147  | 0.204  | 0.143  | 0.096  | 0.166  | 0.116  | 0.20  | 0.13  | 1.1 | 0.2449 |     |
| mmu-miR-138*      | -0.210 | -0.110 | -0.218 | -0.201 | -0.300 | -0.184 | -0.300 | -0.230 | -0.18 | -0.25 | 1.0 | 0.0156 |     |
| mmu-miR-20a       | -0.341 | 0.195  | 0.232  | -0.099 | -0.029 | 0.044  | -0.335 | 0.038  | 0.00  | -0.07 | 1.0 | 0.7507 |     |
| mmu-miR-297a*/mmu | 0.050  | -0.086 | -0.066 | 0.023  | -0.082 | -0.109 | -0.062 | -0.090 | -0.02 | -0.09 | 1.0 | 0.1418 |     |
| mmu-miR-16        | -0.286 | 0.099  | 0.019  | -0.108 | -0.153 | -0.120 | -0.290 | 0.026  | -0.07 | -0.13 | 1.0 | 0.6125 |     |
| mmu-miR-677       | -0.246 | -0.076 | -0.085 | -0.064 | -0.245 | -0.106 | -0.219 | -0.156 | -0.12 | -0.18 | 1.0 | 0.1282 |     |
| mmu-miR-338-5p    | -0.178 | 0.101  | -0.037 | -0.074 | -0.097 | -0.094 | -0.180 | -0.069 | -0.05 | -0.11 | 1.0 | 0.3976 |     |
| mmu-miR-466b-5p   | 0.154  | 0.007  | -0.076 | 0.164  | -0.008 | 0.012  | 0.035  | -0.042 | 0.06  | 0.00  | 1.0 | 0.4564 |     |
| mmu-miR-191       | 0.007  | -0.003 | -0.071 | -0.071 | -0.141 | -0.060 | -0.138 | -0.048 | -0.03 | -0.10 | 1.0 | 0.1709 |     |
| mmu-miR-293*      | -0.327 | 0.065  | -0.003 | -0.230 | -0.172 | -0.116 | -0.362 | -0.089 | -0.12 | -0.18 | 1.0 | 0.6619 |     |
| mmu-miR-770-5p    | -0.301 | -0.174 | -0.253 | NA     | -0.279 | -0.332 | -0.388 | -0.211 | -0.24 | -0.30 | 1.0 | 0.2520 |     |

|                  |        |        |        |        |        |        |        |        |       |       |     |        |     |
|------------------|--------|--------|--------|--------|--------|--------|--------|--------|-------|-------|-----|--------|-----|
| mmu-miR-667      | -0.150 | -0.212 | -0.197 | -0.216 | -0.229 | -0.266 | -0.250 | -0.267 | -0.19 | -0.25 | 1.0 | 0.0030 | yes |
| mmu-miR-30c      | 0.045  | 0.104  | 0.116  | 0.089  | 0.003  | 0.015  | -0.026 | 0.128  | 0.09  | 0.03  | 1.0 | 0.2247 |     |
| SNORD44-5        | 0.234  | 0.103  | -0.016 | 0.140  | 0.042  | 0.105  | 0.122  | -0.036 | 0.12  | 0.06  | 1.0 | 0.5222 |     |
| mmu-miR-30b      | -0.102 | 0.050  | 0.020  | -0.046 | -0.073 | -0.086 | -0.203 | 0.061  | -0.02 | -0.08 | 1.0 | 0.5143 |     |
| mmu-miR-455      | -0.200 | -0.204 | -0.184 | -0.320 | -0.241 | -0.310 | -0.302 | -0.262 | -0.23 | -0.28 | 1.0 | 0.2917 |     |
| mmu-miR-30e      | -0.160 | 0.066  | 0.107  | -0.008 | -0.083 | -0.023 | -0.184 | 0.098  | 0.00  | -0.05 | 1.0 | 0.6283 |     |
| mmu-miR-292-5p   | -0.142 | -0.070 | -0.162 | -0.134 | -0.251 | -0.185 | -0.210 | -0.056 | -0.13 | -0.18 | 1.0 | 0.3597 |     |
| mmu-miR-669i     | -0.098 | -0.083 | -0.099 | -0.027 | -0.133 | -0.137 | -0.149 | -0.075 | -0.08 | -0.12 | 1.0 | 0.0015 |     |
| mmu-miR-33       | 0.059  | 0.219  | 0.150  | 0.137  | 0.118  | 0.014  | 0.001  | 0.265  | 0.14  | 0.10  | 1.0 | 0.6375 |     |
| mmu-miR-715      | 0.384  | 0.380  | 0.445  | 0.392  | 0.388  | 0.272  | 0.411  | 0.366  | 0.40  | 0.36  | 1.0 | 0.1828 |     |
| mmu-miR-879*     | -0.049 | 0.112  | 0.037  | 0.036  | 0.013  | -0.020 | -0.045 | 0.027  | 0.03  | -0.01 | 1.0 | 0.4114 |     |
| mmu-miR-709      | -0.396 | -0.121 | -0.277 | -0.401 | -0.273 | -0.422 | -0.352 | -0.308 | -0.30 | -0.34 | 1.0 | 0.7083 |     |
| mmu-miR-466a-5p  | 0.178  | 0.114  | 0.034  | 0.239  | 0.060  | 0.155  | 0.164  | 0.030  | 0.14  | 0.10  | 1.0 | 0.6470 |     |
| U6-snRNA-2       | 0.067  | -0.036 | -0.099 | -0.014 | -0.058 | -0.036 | -0.064 | -0.079 | -0.02 | -0.06 | 1.0 | 0.3560 |     |
| mmu-miR-1187     | 0.172  | 0.134  | 0.063  | 0.119  | 0.112  | 0.080  | 0.144  | -0.003 | 0.12  | 0.08  | 1.0 | 0.4353 |     |
| hsa_SNORD14B     | 0.046  | 0.038  | 0.065  | 0.047  | 0.002  | 0.231  | -0.099 | -0.091 | 0.05  | 0.01  | 1.0 | 0.6708 |     |
| mghv-miR-M1-7-3p | -0.018 | -0.015 | 0.059  | -0.003 | 0.025  | -0.154 | 0.004  | -0.004 | 0.01  | -0.03 | 1.0 | 0.4057 |     |
| U6-snRNA-1       | -0.064 | -0.210 | -0.270 | -0.135 | -0.144 | -0.204 | -0.154 | -0.328 | -0.17 | -0.21 | 1.0 | 0.6041 |     |
| mmu-miR-106a     | -0.109 | 0.107  | 0.062  | -0.063 | 0.013  | 0.001  | -0.158 | -0.007 | 0.00  | -0.04 | 1.0 | 0.6654 |     |
| mmu-miR-467h     | 0.097  | 0.073  | -0.013 | 0.142  | 0.117  | 0.004  | 0.036  | 0.001  | 0.07  | 0.04  | 1.0 | 0.4745 |     |
| mmu-miR-669c/mmu | 0.101  | 0.054  | 0.036  | 0.186  | 0.072  | 0.032  | 0.107  | 0.027  | 0.09  | 0.06  | 1.0 | 0.5169 |     |
| mmu-miR-466c-5p  | 0.211  | -0.067 | 0.009  | 0.134  | 0.067  | -0.027 | 0.113  | 0.007  | 0.07  | 0.04  | 1.0 | 0.6417 |     |
| mmu-miR-290-5p   | 0.012  | 0.145  | 0.124  | 0.034  | 0.055  | -0.013 | -0.022 | 0.168  | 0.08  | 0.05  | 1.0 | 0.6921 |     |
| mmu-miR-17       | -0.211 | 0.095  | 0.123  | -0.037 | -0.003 | 0.058  | -0.181 | -0.028 | -0.01 | -0.04 | 1.0 | 0.7875 |     |
| mmu-miR-130b     | 0.053  | -0.012 | 0.031  | 0.172  | 0.018  | -0.167 | 0.092  | 0.187  | 0.06  | 0.03  | 1.0 | 0.5791 |     |
| mmu-let-7d*      | 0.462  | 0.278  | 0.413  | NA     | 0.351  | 0.307  | 0.403  | 0.367  | 0.38  | 0.36  | 1.0 | 0.5422 |     |
| mmu-miR-669d/mmu | 0.159  | 0.070  | 0.084  | 0.244  | 0.107  | 0.095  | 0.206  | 0.042  | 0.14  | 0.11  | 1.0 | 0.7252 |     |
| mmu-miR-294*     | -0.070 | 0.077  | 0.042  | -0.061 | -0.012 | -0.102 | -0.028 | 0.024  | 0.00  | -0.03 | 1.0 | 0.6937 |     |
| mmu-miR-669b     | 0.047  | 0.020  | 0.125  | NA     | 0.055  | -0.039 | 0.082  | 0.058  | 0.06  | 0.04  | 1.0 | 0.2559 |     |
| mmu-miR-291b-5p  | 0.038  | 0.101  | 0.091  | 0.124  | 0.040  | 0.003  | 0.077  | 0.133  | 0.09  | 0.06  | 1.0 | 0.3830 |     |
| mmu-miR-101b     | -0.176 | 0.051  | 0.068  | -0.083 | -0.096 | -0.057 | -0.223 | 0.136  | -0.04 | -0.06 | 1.0 | 0.8365 |     |
| mmu-miR-34b-3p   | -0.239 | -0.075 | -0.206 | -0.213 | -0.227 | -0.087 | -0.243 | -0.270 | -0.18 | -0.21 | 1.0 | 0.2129 |     |
| mmu-miR-294      | -0.283 | -0.168 | -0.200 | -0.289 | -0.264 | -0.264 | -0.343 | -0.161 | -0.24 | -0.26 | 1.0 | 0.7292 |     |
| mmu-miR-15b      | -0.497 | -0.075 | -0.237 | -0.377 | -0.304 | -0.276 | -0.474 | -0.221 | -0.30 | -0.32 | 1.0 | 0.8565 |     |
| mmu-miR-1192     | 0.127  | -0.007 | -0.085 | -0.001 | -0.025 | -0.032 | 0.010  | -0.008 | 0.01  | -0.01 | 1.0 | 0.6905 |     |
| mmu-miR-503*     | -0.172 | -0.054 | -0.117 | -0.112 | -0.122 | -0.104 | -0.167 | -0.145 | -0.11 | -0.13 | 1.0 | 0.4479 |     |
| mmu-miR-26b      | -0.104 | 0.183  | 0.195  | 0.087  | 0.086  | 0.114  | -0.049 | 0.131  | 0.09  | 0.07  | 1.0 | 0.8430 |     |
| mmu-miR-200b*    | -0.056 | -0.014 | -0.018 | -0.125 | -0.068 | -0.151 | 0.001  | -0.072 | -0.05 | -0.07 | 1.0 | 0.6738 |     |
| mmu-miR-693-5p   | -0.023 | -0.003 | -0.030 | -0.010 | -0.038 | 0.012  | -0.009 | -0.097 | -0.02 | -0.03 | 1.0 | 0.5492 |     |



|                 |        |        |        |        |        |        |        |        |       |       |     |        |
|-----------------|--------|--------|--------|--------|--------|--------|--------|--------|-------|-------|-----|--------|
| mmu-miR-466d-5p | 0.182  | 0.074  | 0.077  | 0.208  | 0.100  | 0.118  | 0.203  | 0.065  | 0.14  | 0.12  | 1.0 | 0.8378 |
| mmu-miR-551b    | 0.096  | 0.012  | 0.052  | 0.110  | 0.023  | 0.073  | 0.095  | 0.025  | 0.07  | 0.05  | 1.0 | 0.7492 |
| mmu-miR-92a*    | 0.202  | 0.201  | 0.160  | 0.208  | 0.183  | 0.170  | 0.234  | 0.132  | 0.19  | 0.18  | 1.0 | 0.7089 |
| mmu-miR-574-5p  | 0.173  | -0.017 | -0.034 | 0.095  | 0.017  | 0.076  | 0.119  | -0.046 | 0.05  | 0.04  | 1.0 | 0.8826 |
| mmu-miR-331-3p  | -0.458 | -0.327 | -0.425 | -0.496 | -0.434 | -0.370 | -0.528 | -0.424 | -0.43 | -0.44 | 1.0 | 0.7665 |
| mmu-miR-503     | -0.044 | -0.051 | -0.032 | -0.096 | 0.006  | -0.200 | -0.017 | -0.060 | -0.06 | -0.07 | 1.0 | 0.8151 |
| mmu-let-7e      | -0.432 | -0.208 | -0.304 | -0.410 | -0.261 | -0.362 | -0.494 | -0.282 | -0.34 | -0.35 | 1.0 | 0.9093 |
| mmu-miR-712*    | 0.075  | 0.179  | 0.202  | 0.045  | 0.160  | 0.039  | 0.112  | 0.151  | 0.13  | 0.12  | 1.0 | 0.8875 |
| mmu-miR-542-3p  | -0.157 | -0.092 | -0.087 | -0.097 | -0.148 | -0.086 | -0.159 | -0.075 | -0.11 | -0.12 | 1.0 | 0.7103 |
| mmu-miR-107     | -0.288 | -0.066 | -0.041 | -0.197 | -0.178 | -0.147 | -0.298 | -0.002 | -0.15 | -0.16 | 1.0 | 0.9378 |
| mmu-miR-99b*    | 0.128  | 0.029  | 0.112  | 0.151  | 0.115  | 0.106  | 0.129  | 0.039  | 0.11  | 0.10  | 1.0 | 0.8542 |
| mmu-miR-183*    | -0.074 | 0.038  | -0.017 | -0.022 | -0.010 | -0.073 | 0.000  | -0.016 | -0.02 | -0.02 | 1.0 | 0.8836 |
| mmu-miR-874     | -0.292 | -0.224 | -0.264 | -0.253 | -0.183 | -0.357 | -0.280 | -0.233 | -0.26 | -0.26 | 1.0 | 0.9253 |
| mmu-miR-150     | 0.033  | 0.028  | 0.116  | 0.039  | 0.047  | 0.002  | 0.096  | 0.053  | 0.05  | 0.05  | 1.0 | 0.7114 |
| mmu-miR-375     | 0.023  | 0.049  | 0.075  | -0.010 | 0.048  | 0.023  | 0.031  | 0.019  | 0.03  | 0.03  | 1.0 | 0.8460 |
| mmu-miR-468     | 0.119  | 0.006  | 0.025  | 0.122  | 0.036  | 0.077  | 0.123  | 0.022  | 0.07  | 0.06  | 1.0 | 0.9508 |
| mmu-miR-675-5p  | 0.144  | -0.095 | -0.005 | -0.029 | 0.015  | -0.022 | 0.072  | -0.063 | 0.00  | 0.00  | 1.0 | 0.9493 |
| mmu-miR-675-3p  | -0.175 | 0.009  | -0.007 | -0.124 | -0.012 | -0.205 | -0.099 | 0.009  | -0.07 | -0.08 | 1.0 | 0.9789 |
| mmu-miR-298     | -0.200 | -0.127 | -0.216 | -0.137 | -0.231 | -0.147 | -0.190 | -0.121 | -0.17 | -0.17 | 1.0 | 0.8657 |
| mmu-miR-181d    | -0.085 | 0.066  | 0.023  | -0.087 | -0.074 | -0.172 | -0.054 | 0.208  | -0.02 | -0.02 | 1.0 | 0.9856 |
| mmu-miR-291a-5p | -0.032 | 0.070  | -0.002 | 0.032  | -0.017 | -0.023 | 0.013  | 0.088  | 0.02  | 0.02  | 1.0 | 0.9501 |
| mmu-miR-466e-5p | 0.084  | -0.002 | -0.027 | 0.071  | 0.028  | 0.037  | 0.097  | -0.040 | 0.03  | 0.03  | 1.0 | 0.9827 |
| mmu-miR-330*    | -0.397 | -0.359 | -0.324 | -0.395 | -0.317 | -0.453 | -0.353 | -0.357 | -0.37 | -0.37 | 1.0 | 0.9772 |
| mmu-miR-362-3p  | -0.295 | -0.115 | -0.157 | -0.181 | -0.183 | -0.088 | -0.270 | -0.201 | -0.19 | -0.19 | 1.0 | 0.9817 |
| mmu-miR-669e    | 0.141  | -0.024 | 0.004  | 0.153  | 0.071  | 0.103  | 0.133  | -0.019 | 0.07  | 0.07  | 1.0 | 0.9626 |
| mmu-miR-490     | -0.122 | -0.235 | -0.303 | -0.256 | -0.259 | -0.252 | -0.154 | -0.235 | -0.23 | -0.23 | 1.0 | 0.9524 |
| mmu-miR-296-3p  | 0.070  | -0.002 | 0.056  | 0.074  | 0.047  | 0.048  | 0.053  | 0.070  | 0.05  | 0.05  | 1.0 | 0.7801 |
| U6B-5           | -0.149 | 0.059  | -0.133 | -0.195 | -0.035 | -0.013 | -0.115 | -0.236 | -0.10 | -0.10 | 1.0 | 0.9127 |
| mmu-miR-291a-3p | -0.025 | 0.005  | -0.003 | -0.037 | -0.114 | 0.003  | 0.015  | 0.056  | -0.02 | -0.01 | 1.0 | 0.9003 |
| mmu-miR-197     | -0.203 | -0.187 | -0.229 | -0.210 | -0.235 | -0.138 | -0.233 | -0.196 | -0.21 | -0.20 | 1.0 | 0.7157 |
| mmu-miR-300*    | 0.155  | 0.122  | 0.141  | 0.101  | 0.170  | 0.081  | 0.187  | 0.108  | 0.13  | 0.14  | 1.0 | 0.7301 |
| mmu-miR-720     | -0.035 | -0.060 | -0.101 | -0.050 | -0.125 | 0.021  | -0.122 | 0.008  | -0.06 | -0.05 | 1.0 | 0.8651 |
| mmu-miR-184     | 0.125  | 0.012  | 0.095  | 0.059  | 0.135  | -0.153 | 0.230  | 0.109  | 0.07  | 0.08  | 1.0 | 0.9123 |
| 5SrRNA-5        | 0.085  | 0.059  | 0.125  | 0.098  | 0.104  | 0.170  | 0.071  | 0.056  | 0.09  | 0.10  | 1.0 | 0.8413 |
| mmu-miR-425     | -0.179 | -0.118 | -0.108 | -0.165 | -0.206 | -0.077 | -0.172 | -0.073 | -0.14 | -0.13 | 1.0 | 0.7803 |
| mcmv-miR-m88-1  | -0.024 | -0.121 | -0.136 | -0.065 | -0.088 | -0.114 | -0.077 | -0.025 | -0.09 | -0.08 | 1.0 | 0.7176 |
| mmu-miR-883b-5p | -0.074 | -0.057 | -0.028 | -0.122 | -0.090 | -0.042 | -0.035 | -0.070 | -0.07 | -0.06 | 1.0 | 0.5205 |
| mmu-miR-325     | 0.105  | -0.010 | -0.033 | -0.033 | -0.038 | 0.058  | 0.067  | -0.009 | 0.01  | 0.02  | 1.0 | 0.8349 |
| mmu-miR-30b*    | 0.160  | 0.048  | -0.043 | 0.136  | 0.055  | 0.090  | 0.149  | 0.063  | 0.08  | 0.09  | 1.0 | 0.8491 |

yes

|                 |        |        |        |        |        |        |        |        |       |       |     |        |
|-----------------|--------|--------|--------|--------|--------|--------|--------|--------|-------|-------|-----|--------|
| mmu-miR-714     | 0.196  | -0.010 | 0.190  | 0.153  | 0.112  | 0.018  | 0.263  | 0.195  | 0.13  | 0.15  | 1.0 | 0.6978 |
| mmu-miR-302b    | -0.328 | 0.301  | 0.335  | 0.284  | 0.146  | 0.929  | -0.281 | -0.139 | 0.15  | 0.16  | 1.0 | 0.9634 |
| mmu-miR-344     | -0.224 | -0.159 | -0.195 | -0.229 | -0.263 | -0.168 | -0.198 | -0.108 | -0.20 | -0.18 | 1.0 | 0.6568 |
| mmu-miR-881     | -0.019 | -0.079 | -0.170 | -0.104 | -0.115 | -0.053 | -0.073 | -0.058 | -0.09 | -0.07 | 1.0 | 0.6822 |
| mmu-miR-103     | -0.100 | 0.055  | 0.086  | 0.002  | -0.009 | 0.033  | -0.025 | 0.118  | 0.01  | 0.03  | 1.0 | 0.7458 |
| mmu-miR-705     | 0.059  | 0.057  | 0.095  | 0.085  | 0.040  | 0.137  | 0.092  | 0.102  | 0.07  | 0.09  | 1.0 | 0.4519 |
| mmu-miR-695     | 0.042  | 0.058  | 0.036  | 0.010  | 0.057  | -0.011 | 0.143  | 0.033  | 0.04  | 0.06  | 1.0 | 0.6226 |
| mmu-miR-149     | -0.093 | -0.174 | -0.119 | -0.150 | -0.200 | 0.037  | -0.138 | -0.157 | -0.13 | -0.11 | 1.0 | 0.7897 |
| mmu-miR-804     | -0.069 | 0.013  | 0.036  | 0.032  | -0.038 | 0.081  | -0.018 | 0.067  | 0.00  | 0.02  | 1.0 | 0.5013 |
| mmu-miR-27a     | -0.328 | 0.025  | -0.016 | -0.225 | -0.088 | 0.037  | -0.355 | -0.051 | -0.14 | -0.11 | 1.0 | 0.8761 |
| mghv-miR-M1-8   | 0.194  | 0.017  | 0.047  | 0.035  | 0.056  | 0.087  | 0.130  | 0.108  | 0.07  | 0.10  | 1.0 | 0.7055 |
| mmu-miR-466f-5p | 0.099  | 0.054  | 0.093  | 0.217  | 0.131  | 0.141  | 0.198  | 0.083  | 0.12  | 0.14  | 1.0 | 0.7076 |
| mmu-miR-17*     | -0.189 | -0.174 | -0.112 | -0.128 | -0.081 | -0.283 | -0.074 | -0.074 | -0.15 | -0.13 | 1.0 | 0.6610 |
| mmu-miR-345-5p  | -0.136 | -0.079 | -0.054 | -0.227 | -0.076 | -0.162 | -0.076 | -0.087 | -0.12 | -0.10 | 1.0 | 0.6652 |
| SNORD48-5       | 0.191  | 0.068  | 0.058  | 0.134  | 0.122  | 0.162  | 0.212  | 0.052  | 0.11  | 0.14  | 1.0 | 0.7104 |
| mmu-miR-669h-3p | 0.081  | 0.007  | -0.002 | 0.038  | 0.000  | 0.076  | 0.072  | 0.082  | 0.03  | 0.06  | 1.0 | 0.5170 |
| mmu-miR-678     | 0.066  | 0.048  | -0.005 | 0.011  | 0.015  | 0.035  | 0.150  | 0.029  | 0.03  | 0.06  | 1.0 | 0.5871 |
| mmu-miR-34c*    | -0.088 | -0.230 | -0.312 | -0.228 | -0.215 | -0.124 | -0.188 | -0.222 | -0.21 | -0.19 | 1.0 | 0.6673 |
| mmu-miR-140     | -0.021 | 0.086  | 0.125  | 0.054  | 0.075  | 0.152  | -0.023 | 0.150  | 0.06  | 0.09  | 1.0 | 0.6725 |
| mmu-miR-215     | -0.178 | -0.146 | -0.155 | -0.134 | -0.118 | -0.187 | -0.065 | -0.131 | -0.15 | -0.13 | 1.0 | 0.4130 |
| mmu-miR-292-3p  | -0.114 | -0.100 | -0.131 | -0.107 | -0.155 | -0.085 | -0.076 | -0.025 | -0.11 | -0.08 | 1.0 | 0.3735 |
| mmu-miR-295     | -0.140 | -0.069 | -0.061 | -0.043 | -0.115 | -0.076 | -0.045 | 0.038  | -0.08 | -0.05 | 1.0 | 0.2201 |
| mmu-miR-1196    | -0.036 | -0.044 | -0.091 | -0.064 | -0.051 | -0.052 | 0.042  | -0.057 | -0.06 | -0.03 | 1.0 | 0.4579 |
| mmu-miR-615-3p  | -0.013 | -0.064 | -0.061 | -0.089 | 0.010  | -0.074 | -0.003 | -0.037 | -0.06 | -0.03 | 1.0 | 0.1419 |
| mmu-miR-383     | -0.155 | -0.148 | -0.151 | -0.067 | -0.161 | -0.052 | -0.096 | -0.084 | -0.13 | -0.10 | 1.0 | 0.3142 |
| mmu-let-7b      | 0.142  | -0.109 | -0.044 | 0.099  | 0.021  | -0.039 | 0.158  | 0.085  | 0.02  | 0.06  | 1.0 | 0.6521 |
| mmu-miR-875-3p  | -0.065 | -0.036 | -0.089 | -0.069 | -0.058 | 0.180  | -0.121 | -0.122 | -0.06 | -0.03 | 1.0 | 0.6188 |
| mmu-miR-152     | 0.128  | 0.001  | 0.003  | 0.156  | 0.014  | 0.202  | 0.030  | 0.179  | 0.07  | 0.11  | 1.0 | 0.6322 |
| mmu-miR-339-5p  | -0.345 | -0.183 | -0.249 | -0.264 | -0.265 | -0.148 | -0.303 | -0.188 | -0.26 | -0.23 | 1.0 | 0.3496 |
| mmu-miR-301a    | -0.354 | -0.079 | 0.000  | -0.235 | -0.246 | -0.036 | -0.318 | 0.071  | -0.17 | -0.13 | 1.0 | 0.8058 |
| mghv-miR-M1-4   | 0.103  | 0.051  | 0.068  | 0.047  | 0.096  | 0.077  | 0.135  | 0.107  | 0.07  | 0.10  | 1.0 | 0.1211 |
| mmu-miR-713     | -0.060 | -0.142 | -0.177 | -0.212 | -0.107 | -0.192 | -0.057 | -0.078 | -0.15 | -0.11 | 1.0 | 0.4949 |
| mmu-miR-805     | -0.377 | -0.042 | -0.140 | -0.359 | -0.314 | 0.309  | -0.529 | -0.220 | -0.23 | -0.19 | 1.0 | 0.8095 |
| mmu-miR-483*    | 0.134  | 0.108  | 0.116  | 0.110  | 0.193  | 0.098  | 0.144  | 0.199  | 0.12  | 0.16  | 1.0 | 0.1461 |
| mghv-miR-M1-3   | 0.076  | -0.068 | -0.031 | -0.057 | 0.011  | -0.027 | 0.095  | 0.011  | -0.02 | 0.02  | 1.0 | 0.3661 |
| mmu-miR-686     | -0.162 | -0.092 | -0.235 | NA     | -0.148 | -0.163 | -0.065 | -0.103 | -0.16 | -0.12 | 1.0 | 0.6499 |
| mmu-miR-106b*   | 0.033  | -0.063 | -0.071 | -0.007 | 0.054  | -0.081 | -0.006 | 0.101  | -0.03 | 0.02  | 1.0 | 0.2012 |
| mmu-miR-328     | 0.131  | 0.266  | 0.250  | NA     | 0.225  | 0.251  | 0.249  | 0.322  | 0.22  | 0.26  | 1.0 | 0.5282 |
| mmu-miR-674*    | -0.178 | -0.036 | -0.145 | -0.143 | -0.124 | -0.156 | -0.083 | 0.045  | -0.13 | -0.08 | 1.0 | 0.5191 |

|                   |        |        |        |        |        |        |        |        |       |       |     |         |
|-------------------|--------|--------|--------|--------|--------|--------|--------|--------|-------|-------|-----|---------|
| mmu-miR-763       | -0.045 | -0.192 | -0.265 | -0.301 | -0.156 | -0.341 | -0.030 | -0.083 | -0.20 | -0.15 | 1.0 | 0.6736  |
| mmu-miR-7a        | -0.031 | 0.012  | 0.024  | -0.004 | 0.051  | 0.152  | -0.088 | 0.080  | 0.00  | 0.05  | 1.0 | 0.4452  |
| mmu-miR-872*      | -0.195 | -0.121 | -0.130 | -0.165 | -0.078 | -0.173 | -0.070 | -0.093 | -0.15 | -0.10 | 1.0 | 0.2633  |
| mmu-miR-191*      | -0.055 | 0.075  | 0.031  | 0.089  | 0.049  | 0.173  | 0.001  | 0.116  | 0.03  | 0.08  | 1.0 | 0.2159  |
| mmu-miR-129-5p    | 0.285  | 0.184  | 0.284  | 0.156  | 0.246  | 0.255  | 0.319  | 0.289  | 0.23  | 0.28  | 1.0 | 0.2577  |
| mmu-miR-361       | -0.018 | -0.035 | -0.017 | 0.051  | 0.007  | 0.048  | 0.040  | 0.093  | 0.00  | 0.05  | 1.0 | 0.0251  |
| mmu-miR-744       | 0.039  | 0.087  | 0.059  | 0.017  | 0.146  | -0.007 | 0.128  | 0.144  | 0.05  | 0.10  | 1.0 | 0.3762  |
| mmu-miR-24-1*     | -0.374 | -0.210 | -0.268 | -0.342 | -0.263 | -0.056 | -0.335 | -0.332 | -0.30 | -0.25 | 1.0 | 0.3712  |
| mmu-miR-106b      | -0.269 | -0.122 | -0.104 | -0.149 | -0.147 | -0.101 | -0.187 | 0.001  | -0.16 | -0.11 | 1.0 | 0.3935  |
| mmu-miR-685       | -0.142 | -0.173 | -0.150 | -0.218 | -0.117 | -0.081 | -0.089 | -0.183 | -0.17 | -0.12 | 1.0 | 0.0385  |
| mmu-miR-877       | -0.003 | -0.044 | -0.010 | -0.023 | -0.019 | -0.027 | 0.118  | 0.064  | -0.02 | 0.03  | 1.0 | 0.1991  |
| mmu-miR-30e*      | -0.129 | 0.013  | 0.007  | NA     | 0.014  | 0.042  | -0.066 | 0.082  | -0.04 | 0.02  | 1.0 | 0.6491  |
| mmu-miR-465b-5p   | -0.125 | -0.047 | -0.139 | -0.083 | -0.078 | -0.029 | -0.078 | 0.011  | -0.10 | -0.04 | 1.0 | 0.0380  |
| mmu-miR-124       | -0.229 | -0.250 | -0.296 | -0.210 | -0.112 | -0.406 | -0.066 | -0.176 | -0.25 | -0.19 | 1.0 | 0.5399  |
| hsa_SNORD6        | -0.276 | -0.289 | -0.170 | -0.178 | -0.132 | -0.246 | -0.163 | -0.147 | -0.23 | -0.17 | 1.0 | 0.1587  |
| mmu-miR-125b-3p   | 0.161  | 0.010  | 0.037  | 0.035  | 0.128  | 0.059  | 0.191  | 0.096  | 0.06  | 0.12  | 1.0 | 0.2301  |
| mmu-miR-721       | -0.040 | -0.061 | -0.035 | -0.050 | 0.065  | -0.110 | 0.101  | 0.001  | -0.05 | 0.01  | 1.0 | 0.2293  |
| mmu-miR-23b       | -0.395 | -0.077 | -0.162 | -0.223 | -0.205 | 0.022  | -0.336 | -0.093 | -0.21 | -0.15 | 1.0 | 0.5025  |
| mmu-miR-26a       | -0.064 | 0.075  | 0.094  | 0.016  | 0.125  | 0.093  | 0.016  | 0.132  | 0.03  | 0.09  | 1.0 | 0.3692  |
| mmu-miR-433*      | 0.134  | 0.046  | 0.128  | 0.045  | 0.112  | 0.151  | 0.179  | 0.158  | 0.09  | 0.15  | 1.0 | 0.1413  |
| mmu-miR-615-5p    | NA     | -0.025 | NA     | NA     | 0.062  | 0.050  | 0.102  | -0.064 | -0.02 | 0.04  | 1.0 | #DIV/0! |
| mmu-miR-130b*     | -0.115 | -0.097 | -0.151 | -0.080 | -0.081 | -0.049 | -0.029 | -0.030 | -0.11 | -0.05 | 1.0 | 0.0484  |
| mmu-miR-295*      | -0.239 | -0.100 | -0.140 | -0.218 | -0.107 | -0.114 | -0.178 | -0.041 | -0.17 | -0.11 | 1.0 | 0.3121  |
| mmu-miR-30d       | -0.102 | -0.103 | -0.095 | -0.050 | -0.057 | -0.039 | -0.077 | 0.079  | -0.09 | -0.02 | 1.0 | 0.0730  |
| mmu-miR-140*      | -0.204 | -0.173 | -0.207 | -0.207 | -0.162 | -0.122 | -0.158 | -0.086 | -0.20 | -0.13 | 1.0 | 0.0399  |
| mmu-miR-129-3p    | NA     | -0.169 | -0.232 | NA     | -0.120 | -0.203 | -0.142 | -0.070 | -0.20 | -0.13 | 1.0 | 0.7309  |
| mmu-miR-689       | -0.194 | -0.170 | -0.238 | -0.168 | -0.099 | -0.190 | -0.151 | -0.050 | -0.19 | -0.12 | 1.0 | 0.1051  |
| mmu-miR-151-5p    | -0.502 | -0.231 | -0.303 | NA     | -0.264 | -0.141 | -0.428 | -0.267 | -0.35 | -0.28 | 1.0 | 0.5877  |
| mmu-miR-205       | 0.465  | 0.480  | 0.539  | 0.550  | 0.404  | 0.619  | 0.404  | 0.896  | 0.51  | 0.58  | 1.0 | 0.5494  |
| mmu-miR-367       | 0.259  | 0.429  | 0.553  | 0.716  | 0.547  | 1.357  | 0.134  | 0.215  | 0.49  | 0.56  | 1.0 | 0.8402  |
| mcmv-miR-M23-1-5p | -0.126 | -0.046 | -0.035 | -0.069 | 0.021  | -0.124 | 0.050  | 0.072  | -0.07 | 0.00  | 1.0 | 0.2548  |
| mmu-miR-25        | -0.025 | -0.078 | -0.113 | 0.014  | -0.070 | -0.015 | 0.102  | 0.086  | -0.05 | 0.03  | 0.9 | 0.2495  |
| hsa_SNORD13       | -0.475 | -0.213 | -0.291 | -0.432 | -0.260 | -0.251 | -0.354 | -0.235 | -0.35 | -0.28 | 0.9 | 0.3712  |
| mmu-miR-423-3p    | -0.205 | -0.158 | -0.217 | -0.207 | -0.139 | -0.120 | -0.113 | -0.100 | -0.20 | -0.12 | 0.9 | 0.0166  |
| mmu-miR-16*       | -0.050 | -0.080 | -0.165 | -0.104 | -0.100 | -0.094 | 0.076  | 0.036  | -0.10 | -0.02 | 0.9 | 0.3272  |
| mghv-miR-M1-5     | -0.050 | -0.057 | -0.041 | -0.038 | 0.020  | -0.114 | 0.116  | 0.115  | -0.05 | 0.03  | 0.9 | 0.2067  |
| mmu-miR-148b      | -0.013 | -0.059 | -0.086 | 0.064  | -0.005 | 0.076  | 0.053  | 0.106  | -0.02 | 0.06  | 0.9 | 0.0908  |
| mmu-miR-342-3p    | -0.379 | -0.242 | -0.311 | -0.298 | -0.261 | -0.192 | -0.308 | -0.138 | -0.31 | -0.22 | 0.9 | 0.0987  |
| mmu-miR-671-5p    | -0.017 | -0.195 | -0.121 | -0.092 | -0.004 | -0.122 | 0.042  | -0.001 | -0.11 | -0.02 | 0.9 | 0.0705  |

yes

|                 |        |        |        |        |        |        |        |        |       |       |            |         |
|-----------------|--------|--------|--------|--------|--------|--------|--------|--------|-------|-------|------------|---------|
| mmu-miR-326     | -0.096 | -0.069 | 0.023  | -0.125 | 0.040  | -0.010 | 0.064  | -0.007 | -0.07 | 0.02  | <b>0.9</b> | 0.0306  |
| mmu-miR-210     | -0.281 | -0.176 | -0.271 | -0.141 | -0.207 | -0.184 | -0.111 | 0.008  | -0.22 | -0.12 | <b>0.9</b> | 0.0943  |
| mmu-miR-30a     | -0.268 | -0.186 | -0.246 | -0.188 | -0.170 | -0.078 | -0.201 | -0.062 | -0.22 | -0.13 | <b>0.9</b> | 0.0124  |
| mmu-miR-34a     | -0.356 | -0.272 | -0.243 | -0.254 | -0.215 | -0.135 | -0.260 | -0.133 | -0.28 | -0.19 | <b>0.9</b> | 0.0862  |
| mmu-miR-28      | -0.357 | -0.111 | -0.113 | -0.263 | -0.108 | 0.056  | -0.264 | -0.119 | -0.21 | -0.11 | <b>0.9</b> | 0.3256  |
| mmu-miR-542-5p  | -0.110 | -0.096 | -0.131 | -0.088 | 0.021  | -0.038 | 0.031  | -0.029 | -0.11 | 0.00  | <b>0.9</b> | 0.0303  |
| mmu-miR-688     | -0.284 | -0.174 | -0.219 | -0.198 | -0.082 | -0.295 | -0.031 | -0.034 | -0.22 | -0.11 | <b>0.9</b> | 0.2535  |
| mmu-miR-296-5p  | 0.330  | 0.219  | 0.226  | 0.235  | 0.418  | 0.229  | 0.383  | 0.414  | 0.25  | 0.36  | <b>0.9</b> | 0.0643  |
| mmu-miR-9*      | -0.208 | -0.205 | -0.141 | -0.234 | -0.016 | -0.114 | -0.152 | -0.062 | -0.20 | -0.09 | <b>0.9</b> | 0.0959  |
| mmu-miR-881*    | 0.013  | -0.070 | -0.146 | 0.000  | 0.105  | -0.025 | 0.140  | 0.023  | -0.05 | 0.06  | <b>0.9</b> | 0.1593  |
| mmu-miR-186     | -0.076 | -0.095 | -0.020 | -0.036 | 0.031  | 0.073  | 0.001  | 0.117  | -0.06 | 0.06  | <b>0.9</b> | 0.0425  |
| mmu-miR-350     | -0.286 | -0.135 | -0.202 | -0.187 | -0.081 | -0.022 | -0.220 | -0.030 | -0.20 | -0.09 | <b>0.9</b> | 0.0978  |
| mmu-miR-876-5p  | -0.498 | -0.296 | -0.422 | NA     | NA     | -0.264 | -0.378 | -0.231 | -0.41 | -0.29 | <b>0.9</b> | 0.0967  |
| mmu-miR-465c-5p | -0.108 | -0.032 | -0.036 | -0.159 | 0.079  | -0.018 | 0.019  | 0.046  | -0.08 | 0.03  | <b>0.9</b> | 0.0930  |
| mmu-miR-674     | -0.173 | -0.138 | -0.148 | -0.136 | -0.031 | -0.164 | -0.009 | 0.071  | -0.15 | -0.03 | <b>0.9</b> | 0.1024  |
| mmu-miR-185     | -0.190 | -0.168 | -0.242 | -0.130 | -0.167 | 0.005  | -0.041 | -0.053 | -0.18 | -0.06 | <b>0.9</b> | 0.0652  |
| mmu-miR-24      | -0.198 | -0.019 | -0.088 | -0.141 | 0.010  | 0.152  | -0.091 | -0.036 | -0.11 | 0.01  | <b>0.9</b> | 0.0805  |
| mmu-miR-351     | -0.056 | -0.138 | -0.099 | -0.081 | 0.089  | -0.029 | 0.066  | 0.025  | -0.09 | 0.04  | <b>0.9</b> | 0.0027  |
| mmu-miR-877*    | NA     | NA     | 0.542  | NA     | NA     | 0.670  | 0.738  | 0.614  | 0.54  | 0.67  | <b>0.9</b> | #DIV/0! |
| mmu-miR-322     | -0.153 | -0.083 | -0.185 | NA     | 0.021  | 0.068  | -0.052 | -0.067 | -0.14 | -0.01 | <b>0.9</b> | 0.0058  |
| mmu-miR-423-5p  | -0.122 | -0.076 | -0.139 | -0.082 | -0.017 | 0.003  | 0.091  | 0.078  | -0.10 | 0.04  | <b>0.9</b> | 0.0229  |
| mmu-miR-711     | 0.188  | 0.203  | 0.237  | 0.122  | 0.345  | 0.254  | 0.380  | 0.358  | 0.19  | 0.33  | <b>0.9</b> | 0.0303  |
| mmu-let-7c      | 0.120  | 0.016  | 0.024  | -0.034 | 0.192  | 0.188  | 0.187  | 0.150  | 0.03  | 0.18  | <b>0.9</b> | 0.0102  |
| mmu-miR-196a*   | -0.590 | -0.569 | -0.696 | NA     | NA     | -0.551 | -0.330 | -0.530 | -0.62 | -0.47 | <b>0.9</b> | 0.4679  |
| mmu-miR-335-5p  | -1.754 | -1.761 | -1.792 | -1.759 | -1.659 | -1.481 | -1.767 | -1.558 | -1.77 | -1.62 | <b>0.9</b> | 0.0764  |
| mmu-miR-208a    | -0.484 | -0.492 | -0.561 | -0.657 | -0.319 | -0.434 | -0.383 | -0.447 | -0.55 | -0.40 | <b>0.9</b> | 0.0193  |
| mmu-miR-509-3p  | -0.016 | -0.313 | NA     | NA     | -0.052 | -0.010 | 0.083  | -0.057 | -0.16 | -0.01 | <b>0.9</b> | 0.5750  |
| mmu-miR-883a-5p | -0.065 | -0.114 | -0.091 | 0.047  | 0.016  | 0.171  | 0.158  | 0.056  | -0.06 | 0.10  | <b>0.9</b> | 0.0994  |
| mmu-miR-223     | NA     | -0.852 | -0.711 | -0.589 | -0.699 | NA     | -0.489 | -0.479 | -0.72 | -0.56 | <b>0.9</b> | 0.2058  |
| mmu-miR-290-3p  | 0.056  | 0.018  | 0.148  | 0.078  | 0.250  | 0.155  | 0.246  | 0.301  | 0.08  | 0.24  | <b>0.9</b> | 0.0100  |
| mmu-miR-22*     | -0.112 | -0.172 | -0.260 | -0.210 | 0.008  | 0.086  | -0.085 | -0.109 | -0.19 | -0.02 | <b>0.9</b> | 0.0188  |
| mmu-miR-378     | -0.350 | -0.280 | -0.274 | -0.249 | -0.070 | -0.243 | -0.154 | -0.025 | -0.29 | -0.12 | <b>0.9</b> | 0.0553  |
| mmu-miR-343     | -0.017 | -0.063 | -0.094 | NA     | 0.085  | 0.161  | 0.132  | 0.064  | -0.06 | 0.11  | <b>0.9</b> | 0.0460  |
| mmu-miR-93      | -0.092 | -0.012 | 0.015  | -0.063 | 0.107  | 0.097  | 0.109  | 0.224  | -0.04 | 0.13  | <b>0.9</b> | 0.0311  |
| mmu-miR-882     | 0.073  | 0.010  | -0.014 | 0.078  | 0.213  | 0.192  | 0.272  | 0.173  | 0.04  | 0.21  | <b>0.9</b> | 0.0232  |
| mmu-miR-710     | 0.129  | 0.010  | 0.040  | 0.007  | 0.171  | 0.183  | 0.312  | 0.234  | 0.05  | 0.22  | <b>0.9</b> | 0.0376  |
| mmu-miR-421     | -0.294 | -0.080 | -0.042 | -0.149 | 0.052  | 0.094  | -0.098 | 0.109  | -0.14 | 0.04  | <b>0.9</b> | 0.1273  |
| mmu-miR-302d    | 0.102  | 0.276  | 0.303  | 0.551  | 0.491  | 1.278  | 0.121  | 0.067  | 0.31  | 0.49  | <b>0.9</b> | 0.6197  |
| mmu-miR-23a     | -0.455 | -0.379 | -0.432 | -0.377 | -0.260 | -0.048 | -0.333 | -0.258 | -0.41 | -0.22 | <b>0.9</b> | 0.0385  |

yes

|                   |        |        |        |        |        |        |        |        |         |         |       |         |
|-------------------|--------|--------|--------|--------|--------|--------|--------|--------|---------|---------|-------|---------|
| mmu-miR-706       | 0.235  | -0.046 | -0.144 | 0.114  | 0.094  | 0.383  | 0.312  | 0.123  | 0.04    | 0.23    | 0.9   | 0.2983  |
| hsa_SNORD3@       | -0.008 | -0.286 | -0.290 | -0.109 | -0.027 | -0.013 | 0.083  | 0.019  | -0.17   | 0.02    | 0.9   | 0.1144  |
| mmu-miR-717       | 0.182  | -0.174 | -0.196 | -0.031 | 0.167  | 0.000  | 0.267  | 0.147  | -0.05   | 0.15    | 0.9   | 0.1356  |
| mmu-miR-365       | -0.209 | -0.079 | -0.062 | -0.129 | 0.096  | 0.176  | 0.011  | 0.040  | -0.12   | 0.08    | 0.9   | 0.0293  |
| mmu-miR-302c      | 0.180  | 0.341  | 0.401  | 0.471  | 0.555  | 1.155  | 0.263  | 0.257  | 0.35    | 0.56    | 0.9   | 0.4480  |
| mmu-let-7g        | -0.035 | 0.090  | 0.142  | 0.000  | 0.362  | 0.388  | 0.076  | 0.213  | 0.05    | 0.26    | 0.9   | 0.1249  |
| mmu-miR-24-2*     | -0.410 | -0.269 | -0.329 | -0.373 | -0.131 | 0.027  | -0.239 | -0.193 | -0.35   | -0.13   | 0.9   | 0.0215  |
| mmu-miR-302a      | 0.263  | 0.298  | 0.347  | 0.679  | 0.571  | 1.357  | 0.305  | 0.222  | 0.40    | 0.61    | 0.9   | 0.5481  |
| mmu-miR-193       | -0.251 | -0.288 | -0.327 | -0.290 | -0.079 | 0.051  | -0.161 | -0.038 | -0.29   | -0.06   | 0.9   | 0.0107  |
| mmu-miR-214       | -0.007 | -0.178 | -0.170 | -0.085 | 0.204  | 0.236  | 0.086  | 0.036  | -0.11   | 0.14    | 0.8   | 0.0266  |
| mmu-let-7a        | -0.226 | -0.036 | -0.092 | -0.166 | 0.171  | 0.365  | -0.085 | 0.061  | -0.13   | 0.13    | 0.8   | 0.0694  |
| mmu-miR-762       | -0.121 | -0.204 | -0.103 | -0.101 | 0.220  | -0.133 | 0.220  | 0.259  | -0.13   | 0.14    | 0.8   | 0.0275  |
| mmu-let-7d        | -0.163 | -0.076 | -0.101 | -0.086 | 0.288  | 0.404  | -0.059 | 0.078  | -0.11   | 0.18    | 0.8   | 0.0779  |
| mmu-miR-29c       | -0.618 | -0.504 | -0.575 | -0.503 | -0.304 | 0.009  | -0.392 | -0.363 | -0.55   | -0.26   | 0.8   | 0.0415  |
| mmu-miR-320       | -0.265 | -0.295 | -0.346 | -0.202 | -0.041 | 0.090  | -0.034 | 0.067  | -0.28   | 0.02    | 0.8   | 0.0032  |
| mmu-let-7f        | -0.297 | -0.097 | -0.092 | -0.246 | 0.135  | 0.426  | -0.108 | 0.046  | -0.18   | 0.12    | 0.8   | 0.0794  |
| mmu-miR-143       | -0.210 | -0.149 | -0.135 | -0.179 | 0.236  | 0.411  | -0.083 | 0.050  | -0.17   | 0.15    | 0.8   | 0.0653  |
| mmu-miR-31        | -0.304 | -0.153 | -0.131 | -0.172 | 0.121  | 0.464  | -0.003 | -0.048 | -0.19   | 0.13    | 0.8   | 0.0745  |
| mmu-miR-34c       | 0.055  | 0.132  | 0.154  | 0.165  | 0.432  | 0.738  | 0.254  | 0.379  | 0.13    | 0.45    | 0.8   | 0.0596  |
| mmu-miR-221       | 0.045  | -0.029 | -0.012 | 0.089  | 0.396  | 0.552  | 0.236  | 0.217  | 0.02    | 0.35    | 0.8   | 0.0426  |
| mmu-miR-10a       | NA     | -0.102 | NA     | NA     | 0.319  | 0.347  | 0.094  | 0.149  | -0.10   | 0.23    | 0.8   | #DIV/0! |
| mmu-miR-21        | -0.173 | -0.059 | -0.059 | 0.063  | 0.260  | 0.636  | 0.031  | 0.163  | -0.06   | 0.27    | 0.8   | 0.1085  |
| mmu-miR-145       | -0.209 | -0.301 | -0.367 | NA     | 0.067  | 0.197  | -0.071 | 0.014  | -0.29   | 0.05    | 0.8   | 0.0373  |
| mmu-miR-22        | -0.096 | -0.194 | -0.159 | -0.066 | 0.194  | 0.481  | 0.187  | 0.011  | -0.13   | 0.22    | 0.8   | 0.0677  |
| mmu-miR-374       | -0.611 | -0.325 | -0.400 | -0.365 | -0.111 | 0.253  | -0.284 | -0.089 | -0.42   | -0.06   | 0.8   | 0.0401  |
| mmu-miR-34b-5p    | -0.197 | -0.093 | -0.110 | -0.190 | 0.212  | 0.619  | 0.038  | 0.160  | -0.15   | 0.26    | 0.8   | 0.0403  |
| mmu-miR-29b       | -0.351 | -0.305 | -0.291 | -0.321 | 0.144  | 0.319  | -0.089 | -0.011 | -0.32   | 0.09    | 0.8   | 0.0226  |
| mmu-miR-222       | -0.154 | -0.222 | -0.226 | -0.116 | 0.317  | 0.480  | 0.124  | 0.026  | -0.18   | 0.24    | 0.7   | 0.0379  |
| mmu-miR-199a-3p/m | -0.346 | -0.176 | -0.226 | -0.270 | 0.310  | 0.455  | -0.115 | 0.040  | -0.25   | 0.17    | 0.7   | 0.0476  |
| mmu-let-7i        | -0.076 | -0.208 | -0.112 | -0.181 | 0.379  | 0.532  | 0.185  | 0.171  | -0.14   | 0.32    | 0.7   | 0.0185  |
| mmu-miR-29a       | -0.148 | -0.230 | -0.192 | -0.157 | 0.375  | 0.534  | 0.207  | 0.187  | -0.18   | 0.33    | 0.7   | 0.0122  |
| mmu-miR-199a-5p   | -0.033 | -0.215 | -0.242 | -0.139 | 0.437  | 0.608  | 0.237  | 0.183  | -0.16   | 0.37    | 0.7   | 0.0159  |
| mmu-miR-125b-5p   | -0.183 | -0.237 | -0.231 | -0.138 | 0.393  | 0.539  | 0.248  | 0.141  | -0.20   | 0.33    | 0.7   | 0.0145  |
| mmu-miR-199b*     | -0.043 | -0.250 | -0.216 | -0.067 | 0.480  | 0.565  | 0.272  | 0.233  | -0.14   | 0.39    | 0.7   | 0.0154  |
| mmu-miR-27b       | NA     | NA     | NA     | NA     | 0.207  | 0.168  | 0.111  | 0.225  | #DIV/0! | 0.18    | ##### | #DIV/0! |
| mmu-miR-181a      | NA     | NA     | NA     | NA     | 0.288  | 0.665  | 0.383  | 0.242  | #DIV/0! | 0.39    | ##### | #DIV/0! |
| mmu-miR-696       | NA     | NA     | NA     | NA     | NA     | NA     | 0.087  | NA     | #DIV/0! | 0.09    | ##### | #DIV/0! |
| mmu-miR-9         | NA     | #DIV/0! | #DIV/0! | ##### | #DIV/0! |
| mmu-miR-20a*      | NA     | NA     | NA     | NA     | NA     | -0.153 | -0.218 | -0.161 | #DIV/0! | -0.18   | ##### | #DIV/0! |

|                      |       |       |       |       |        |        |        |        |         |         |       |         |     |
|----------------------|-------|-------|-------|-------|--------|--------|--------|--------|---------|---------|-------|---------|-----|
| mmu-miR-31*          | NA    | NA    | NA    | NA    | NA     | 0.160  | -0.240 | -0.124 | #DIV/0! | -0.07   | ##### | #DIV/0! |     |
| mmu-miR-433          | 0.857 | 0.886 | 0.776 | 0.983 | NA     | NA     | NA     | NA     | 0.88    | #DIV/0! | ##### | #DIV/0! | yes |
| mmu-miR-134          | 0.395 | 0.523 | NA    | 0.557 | NA     | NA     | NA     | NA     | 0.49    | #DIV/0! | ##### | #DIV/0! | yes |
| mmu-miR-181b         | NA    | NA    | NA    | NA    | NA     | NA     | NA     | 0.108  | #DIV/0! | 0.11    | ##### | #DIV/0! |     |
| mmu-miR-18a*         | NA    | NA    | NA    | NA    | NA     | -0.106 | -0.234 | NA     | #DIV/0! | -0.17   | ##### | #DIV/0! |     |
| mmu-miR-190b         | NA    | NA    | NA    | NA    | 0.442  | NA     | 0.508  | 0.334  | #DIV/0! | 0.43    | ##### | #DIV/0! |     |
| mmu-miR-302a*        | NA    | NA    | NA    | NA    | 0.209  | 0.969  | NA     | NA     | #DIV/0! | 0.59    | ##### | #DIV/0! |     |
| mmu-miR-337-5p       | 0.728 | 0.647 | 0.501 | 0.706 | NA     | NA     | NA     | NA     | 0.65    | #DIV/0! | ##### | #DIV/0! | yes |
| mmu-miR-431          | 0.890 | 0.935 | 0.788 | 0.828 | NA     | NA     | NA     | NA     | 0.86    | #DIV/0! | ##### | #DIV/0! | yes |
| mmu-miR-500          | NA    | NA    | NA    | NA    | NA     | NA     | -0.165 | -0.190 | #DIV/0! | -0.18   | ##### | #DIV/0! |     |
| mmu-miR-30c-1*       | NA    | NA    | NA    | NA    | 0.182  | NA     | 0.240  | 0.269  | #DIV/0! | 0.23    | ##### | #DIV/0! |     |
| mmu-miR-339-3p       | NA    | NA    | NA    | NA    | NA     | -0.352 | -0.189 | NA     | #DIV/0! | -0.27   | ##### | #DIV/0! |     |
| mmu-miR-380-3p       | 0.601 | 0.944 | 0.844 | NA    | NA     | NA     | NA     | NA     | 0.80    | #DIV/0! | ##### | #DIV/0! | yes |
| mmu-miR-133b         | NA    | NA    | NA    | NA    | NA     | NA     | 0.221  | 0.333  | #DIV/0! | 0.28    | ##### | #DIV/0! |     |
| mmu-miR-29b*         | NA    | NA    | NA    | NA    | NA     | NA     | 0.492  | NA     | #DIV/0! | 0.49    | ##### | #DIV/0! |     |
| mmu-miR-346          | NA    | NA    | NA    | NA    | 0.233  | NA     | NA     | NA     | #DIV/0! | 0.23    | ##### | #DIV/0! |     |
| mmu-miR-758          | NA    | 0.794 | 0.702 | NA    | NA     | NA     | NA     | NA     | 0.75    | #DIV/0! | ##### | #DIV/0! | yes |
| mmu-miR-1194         | NA    | NA    | NA    | NA    | NA     | NA     | NA     | NA     | #DIV/0! | #DIV/0! | ##### | #DIV/0! |     |
| mmu-miR-1198         | NA    | NA    | NA    | NA    | 0.185  | NA     | NA     | NA     | #DIV/0! | 0.18    | ##### | #DIV/0! |     |
| mmu-miR-135a         | NA    | 0.582 | NA    | NA    | NA     | NA     | NA     | NA     | 0.58    | #DIV/0! | ##### | #DIV/0! |     |
| mmu-miR-138          | NA    | NA    | NA    | NA    | NA     | NA     | NA     | NA     | #DIV/0! | #DIV/0! | ##### | #DIV/0! |     |
| mmu-miR-302c*        | NA    | NA    | NA    | NA    | NA     | 0.770  | NA     | NA     | #DIV/0! | 0.77    | ##### | #DIV/0! |     |
| mmu-miR-340-5p       | NA    | NA    | NA    | NA    | NA     | NA     | NA     | NA     | #DIV/0! | #DIV/0! | ##### | #DIV/0! |     |
| mmu-miR-471          | NA    | NA    | NA    | NA    | NA     | NA     | NA     | NA     | #DIV/0! | #DIV/0! | ##### | #DIV/0! |     |
| mmu-miR-540-3p       | NA    | 0.256 | NA    | NA    | NA     | NA     | NA     | NA     | 0.26    | #DIV/0! | ##### | #DIV/0! | yes |
| mmu-miR-693-3p       | NA    | NA    | NA    | NA    | NA     | NA     | NA     | -0.285 | #DIV/0! | -0.29   | ##### | #DIV/0! |     |
| mmu-miR-698          | NA    | NA    | NA    | NA    | -0.142 | NA     | NA     | NA     | #DIV/0! | -0.14   | ##### | #DIV/0! |     |
| mmu-let-7a*/mmu-let- | NA    | NA    | NA    | NA    | NA     | NA     | NA     | NA     | #DIV/0! | #DIV/0! | ##### | #DIV/0! |     |
| mmu-let-7b*          | NA    | NA    | NA    | NA    | NA     | NA     | NA     | NA     | #DIV/0! | #DIV/0! | ##### | #DIV/0! |     |
| mmu-let-7c-1*        | NA    | NA    | NA    | NA    | NA     | NA     | NA     | NA     | #DIV/0! | #DIV/0! | ##### | #DIV/0! |     |
| mmu-let-7f*          | NA    | NA    | NA    | NA    | NA     | NA     | NA     | NA     | #DIV/0! | #DIV/0! | ##### | #DIV/0! |     |
| mmu-let-7g*          | NA    | NA    | NA    | NA    | NA     | NA     | NA     | NA     | #DIV/0! | #DIV/0! | ##### | #DIV/0! |     |
| mmu-let-7i*          | NA    | NA    | NA    | NA    | NA     | NA     | NA     | NA     | #DIV/0! | #DIV/0! | ##### | #DIV/0! |     |
| mmu-miR-1            | NA    | NA    | NA    | NA    | NA     | NA     | NA     | NA     | #DIV/0! | #DIV/0! | ##### | #DIV/0! |     |
| mmu-miR-100          | NA    | NA    | NA    | NA    | NA     | NA     | NA     | NA     | #DIV/0! | #DIV/0! | ##### | #DIV/0! |     |
| mmu-miR-101a*        | NA    | NA    | NA    | NA    | NA     | NA     | NA     | NA     | #DIV/0! | #DIV/0! | ##### | #DIV/0! |     |
| mmu-miR-105          | NA    | NA    | NA    | NA    | NA     | NA     | NA     | NA     | #DIV/0! | #DIV/0! | ##### | #DIV/0! |     |
| mmu-miR-10a*         | NA    | NA    | NA    | NA    | NA     | NA     | NA     | NA     | #DIV/0! | #DIV/0! | ##### | #DIV/0! |     |
| mmu-miR-10b          | NA    | NA    | NA    | NA    | NA     | NA     | NA     | NA     | #DIV/0! | #DIV/0! | ##### | #DIV/0! |     |

|                 |    |    |    |    |    |    |    |    |         |         |       |         |     |
|-----------------|----|----|----|----|----|----|----|----|---------|---------|-------|---------|-----|
| mmu-miR-10b*    | NA | #DIV/0! | #DIV/0! | ##### | #DIV/0! |     |
| mmu-miR-1188    | NA | #DIV/0! | #DIV/0! | ##### | #DIV/0! | yes |
| mmu-miR-1190    | NA | #DIV/0! | #DIV/0! | ##### | #DIV/0! |     |
| mmu-miR-1191    | NA | #DIV/0! | #DIV/0! | ##### | #DIV/0! |     |
| mmu-miR-1195    | NA | #DIV/0! | #DIV/0! | ##### | #DIV/0! |     |
| mmu-miR-1197    | NA | #DIV/0! | #DIV/0! | ##### | #DIV/0! | yes |
| mmu-miR-1199    | NA | #DIV/0! | #DIV/0! | ##### | #DIV/0! |     |
| mmu-miR-122     | NA | #DIV/0! | #DIV/0! | ##### | #DIV/0! |     |
| mmu-miR-1224    | NA | #DIV/0! | #DIV/0! | ##### | #DIV/0! |     |
| mmu-miR-124*    | NA | #DIV/0! | #DIV/0! | ##### | #DIV/0! |     |
| mmu-miR-125a-3p | NA | #DIV/0! | #DIV/0! | ##### | #DIV/0! |     |
| mmu-miR-125b*   | NA | #DIV/0! | #DIV/0! | ##### | #DIV/0! |     |
| mmu-miR-126-5p  | NA | #DIV/0! | #DIV/0! | ##### | #DIV/0! |     |
| mmu-miR-128     | NA | #DIV/0! | #DIV/0! | ##### | #DIV/0! |     |
| mmu-miR-1-2-as  | NA | #DIV/0! | #DIV/0! | ##### | #DIV/0! |     |
| mmu-miR-1306    | NA | #DIV/0! | #DIV/0! | ##### | #DIV/0! |     |
| mmu-miR-132     | NA | #DIV/0! | #DIV/0! | ##### | #DIV/0! |     |
| mmu-miR-133a    | NA | #DIV/0! | #DIV/0! | ##### | #DIV/0! |     |
| mmu-miR-135a*   | NA | #DIV/0! | #DIV/0! | ##### | #DIV/0! |     |
| mmu-miR-137     | NA | #DIV/0! | #DIV/0! | ##### | #DIV/0! |     |
| mmu-miR-139-3p  | NA | #DIV/0! | #DIV/0! | ##### | #DIV/0! |     |
| mmu-miR-139-5p  | NA | #DIV/0! | #DIV/0! | ##### | #DIV/0! |     |
| mmu-miR-141*    | NA | #DIV/0! | #DIV/0! | ##### | #DIV/0! |     |
| mmu-miR-144     | NA | #DIV/0! | #DIV/0! | ##### | #DIV/0! |     |
| mmu-miR-145*    | NA | #DIV/0! | #DIV/0! | ##### | #DIV/0! |     |
| mmu-miR-146a    | NA | #DIV/0! | #DIV/0! | ##### | #DIV/0! |     |
| mmu-miR-146b    | NA | #DIV/0! | #DIV/0! | ##### | #DIV/0! |     |
| mmu-miR-146b*   | NA | #DIV/0! | #DIV/0! | ##### | #DIV/0! |     |
| mmu-miR-147     | NA | #DIV/0! | #DIV/0! | ##### | #DIV/0! |     |
| mmu-miR-148a*   | NA | #DIV/0! | #DIV/0! | ##### | #DIV/0! |     |
| mmu-miR-150*    | NA | #DIV/0! | #DIV/0! | ##### | #DIV/0! |     |
| mmu-miR-151-3p  | NA | #DIV/0! | #DIV/0! | ##### | #DIV/0! |     |
| mmu-miR-153     | NA | #DIV/0! | #DIV/0! | ##### | #DIV/0! |     |
| mmu-miR-154     | NA | #DIV/0! | #DIV/0! | ##### | #DIV/0! | yes |
| mmu-miR-155     | NA | #DIV/0! | #DIV/0! | ##### | #DIV/0! |     |
| mmu-miR-15a*    | NA | #DIV/0! | #DIV/0! | ##### | #DIV/0! |     |
| mmu-miR-15b*    | NA | #DIV/0! | #DIV/0! | ##### | #DIV/0! |     |
| mmu-miR-181a-1* | NA | #DIV/0! | #DIV/0! | ##### | #DIV/0! |     |
| mmu-miR-181a-2* | NA | #DIV/0! | #DIV/0! | ##### | #DIV/0! |     |













|                      |    |    |    |    |       |    |    |    |         |         |       |         |
|----------------------|----|----|----|----|-------|----|----|----|---------|---------|-------|---------|
| mcmv-miR-m01-4       | NA | NA | NA | NA | NA    | NA | NA | NA | #DIV/0! | #DIV/0! | ##### | #DIV/0! |
| mcmv-miR-m01-4*      | NA | NA | NA | NA | NA    | NA | NA | NA | #DIV/0! | #DIV/0! | ##### | #DIV/0! |
| mcmv-miR-m107-1-3    | NA | NA | NA | NA | NA    | NA | NA | NA | #DIV/0! | #DIV/0! | ##### | #DIV/0! |
| mcmv-miR-m107-1-5    | NA | NA | NA | NA | NA    | NA | NA | NA | #DIV/0! | #DIV/0! | ##### | #DIV/0! |
| mcmv-miR-m108-1      | NA | NA | NA | NA | NA    | NA | NA | NA | #DIV/0! | #DIV/0! | ##### | #DIV/0! |
| mcmv-miR-m108-1*     | NA | NA | NA | NA | NA    | NA | NA | NA | #DIV/0! | #DIV/0! | ##### | #DIV/0! |
| mcmv-miR-m108-2-3    | NA | NA | NA | NA | NA    | NA | NA | NA | #DIV/0! | #DIV/0! | ##### | #DIV/0! |
| mcmv-miR-m108-2-5    | NA | NA | NA | NA | NA    | NA | NA | NA | #DIV/0! | #DIV/0! | ##### | #DIV/0! |
| mcmv-miR-m108-2-5    | NA | NA | NA | NA | NA    | NA | NA | NA | #DIV/0! | #DIV/0! | ##### | #DIV/0! |
| mcmv-miR-m21-1       | NA | NA | NA | NA | NA    | NA | NA | NA | #DIV/0! | #DIV/0! | ##### | #DIV/0! |
| mcmv-miR-m22-1       | NA | NA | NA | NA | NA    | NA | NA | NA | #DIV/0! | #DIV/0! | ##### | #DIV/0! |
| mcmv-miR-M23-1-3p    | NA | NA | NA | NA | NA    | NA | NA | NA | #DIV/0! | #DIV/0! | ##### | #DIV/0! |
| mcmv-miR-M23-2       | NA | NA | NA | NA | NA    | NA | NA | NA | #DIV/0! | #DIV/0! | ##### | #DIV/0! |
| mcmv-miR-M23-2*      | NA | NA | NA | NA | NA    | NA | NA | NA | #DIV/0! | #DIV/0! | ##### | #DIV/0! |
| mcmv-miR-M44-1       | NA | NA | NA | NA | NA    | NA | NA | NA | #DIV/0! | #DIV/0! | ##### | #DIV/0! |
| mcmv-miR-M55-1       | NA | NA | NA | NA | NA    | NA | NA | NA | #DIV/0! | #DIV/0! | ##### | #DIV/0! |
| mcmv-miR-m59-1       | NA | NA | NA | NA | NA    | NA | NA | NA | #DIV/0! | #DIV/0! | ##### | #DIV/0! |
| mcmv-miR-m59-2       | NA | NA | NA | NA | NA    | NA | NA | NA | #DIV/0! | #DIV/0! | ##### | #DIV/0! |
| mcmv-miR-M87-1       | NA | NA | NA | NA | NA    | NA | NA | NA | #DIV/0! | #DIV/0! | ##### | #DIV/0! |
| mcmv-miR-m88-1*      | NA | NA | NA | NA | NA    | NA | NA | NA | #DIV/0! | #DIV/0! | ##### | #DIV/0! |
| mcmv-miR-M95-1-3p    | NA | NA | NA | NA | NA    | NA | NA | NA | #DIV/0! | #DIV/0! | ##### | #DIV/0! |
| mcmv-miR-M95-1-5p    | NA | NA | NA | NA | NA    | NA | NA | NA | #DIV/0! | #DIV/0! | ##### | #DIV/0! |
| mghv-miR-M1-1        | NA | NA | NA | NA | NA    | NA | NA | NA | #DIV/0! | #DIV/0! | ##### | #DIV/0! |
| mghv-miR-M1-6        | NA | NA | NA | NA | NA    | NA | NA | NA | #DIV/0! | #DIV/0! | ##### | #DIV/0! |
| mghv-miR-M1-7-5p     | NA | NA | NA | NA | NA    | NA | NA | NA | #DIV/0! | #DIV/0! | ##### | #DIV/0! |
| mghv-miR-M1-9        | NA | NA | NA | NA | NA    | NA | NA | NA | #DIV/0! | #DIV/0! | ##### | #DIV/0! |
| SNORD49A-5           | NA | NA | NA | NA | NA    | NA | NA | NA | #DIV/0! | #DIV/0! | ##### | #DIV/0! |
| SNORD66-5            | NA | NA | NA | NA | NA    | NA | NA | NA | #DIV/0! | #DIV/0! | ##### | #DIV/0! |
| hsa_SNORD10          | NA | NA | NA | NA | NA    | NA | NA | NA | #DIV/0! | #DIV/0! | ##### | #DIV/0! |
| hsa_SNORD118         | NA | NA | NA | NA | NA    | NA | NA | NA | #DIV/0! | #DIV/0! | ##### | #DIV/0! |
| hsa_SNORD15A         | NA | NA | NA | NA | NA    | NA | NA | NA | #DIV/0! | #DIV/0! | ##### | #DIV/0! |
| hsa_SNORD4A          | NA | NA | NA | NA | NA    | NA | NA | NA | #DIV/0! | #DIV/0! | ##### | #DIV/0! |
| hsa_negative_control | NA | NA | NA | NA | NA    | NA | NA | NA | #DIV/0! | #DIV/0! | ##### | #DIV/0! |
| hsa_negative_control | NA | NA | NA | NA | NA    | NA | NA | NA | #DIV/0! | #DIV/0! | ##### | #DIV/0! |
| hsa_negative_control | NA | NA | NA | NA | NA    | NA | NA | NA | #DIV/0! | #DIV/0! | ##### | #DIV/0! |
| hsa_negative_control | NA | NA | NA | NA | NA    | NA | NA | NA | #DIV/0! | #DIV/0! | ##### | #DIV/0! |
| hsa_negative_control | NA | NA | NA | NA | NA    | NA | NA | NA | #DIV/0! | #DIV/0! | ##### | #DIV/0! |
| hsa_negative_control | NA | NA | NA | NA | 1.158 | NA | NA | NA | #DIV/0! | 1.16    | ##### | #DIV/0! |

**Supplemental Table 4. 2n blastocyst injections**

| Line    | origin | Gtl2       | Blasts transferred | live pups | degree of coat color chimerism |      |      |      |      |
|---------|--------|------------|--------------------|-----------|--------------------------------|------|------|------|------|
|         |        |            |                    |           | ~10%                           | ~30% | ~50% | ~70% | >90% |
| ESC-1   | Blast. | <b>on</b>  | 22                 | 12        | 0                              | 1    | 1    | 5    | 4    |
| ESC-2   | Blast. | <b>on</b>  | 22                 | 8         | 0                              | 1    | 4    | 1    | 2    |
| iPSC-7  | HSC    | <b>off</b> | 31                 | 2         | 1                              | 0    | 0    | 0    | 0    |
| iPSC-8  | HSC    | <b>off</b> | 26                 | 12        | 3                              | 2    | 2    | 0    | 0    |
| iPSC-22 | HSC    | <b>off</b> | 12                 | 8         | 2                              | 1    | 1    | 0    | 0    |
| iPSC-11 | GMP    | <b>off</b> | 20                 | 9         | 3                              | 1    | 0    | 0    | 0    |
| iPSC-15 | Gran.  | <b>off</b> | 10                 | 5         | 1                              | 0    | 0    | 0    | 0    |
| iPSC-18 | PF     | <b>off</b> | 22                 | 5         | 1                              | 1    | 2    | 0    | 0    |
| iPSC-19 | PF     | <b>on</b>  | 11                 | 4         | 0                              | 0    | 0    | 0    | 1    |
| iPSC-20 | PF     | <b>off</b> | 44                 | 3         | 3                              | 4    | 1    | 0    | 0    |
| iPSC-45 | TTF    | <b>off</b> | 30                 | 8         | 2                              | 3    | 0    | 0    | 0    |
| iPSC-46 | TTF    | <b>off</b> | 50                 | 10        | 2                              | 2    | 0    | 0    | 0    |
| iPSC-47 | TTF    | <b>on</b>  | 49                 | 9         | 0                              | 1    | 1    | 2    | 1    |
| iPSC-49 | TTF    | <b>on</b>  | 20                 | 6         | 0                              | 0    | 1    | 2    | 2    |

**Supplemental Table 5: miRNA profiling of 4n complementation-competent (orange) and non-competent (green) iPSC clones**

| miRNA          | iPSC19 | iPSC47 | iPSC49 | iPSC18 | iPSC20 | iPSC45 | mean  | mean  | fold       | p-value | 12qF1 |
|----------------|--------|--------|--------|--------|--------|--------|-------|-------|------------|---------|-------|
| mmu-miR-376b   | 0.50   | 0.45   | 0.60   | -2.32  | -2.59  | -1.20  | 0.51  | -2.04 | <b>5.9</b> | 0.0216  | yes   |
| mmu-miR-541    | 0.58   | 0.64   | 0.68   | -1.76  | -2.20  | -1.14  | 0.63  | -1.70 | <b>5.0</b> | 0.0156  | yes   |
| mmu-miR-409-3p | 0.56   | 0.60   | 0.69   | -1.61  | -1.87  | -1.09  | 0.62  | -1.52 | <b>4.4</b> | 0.0085  | yes   |
| mmu-miR-411*   | 0.57   | 0.45   | 0.69   | -1.56  | -1.89  | -0.76  | 0.57  | -1.40 | <b>3.9</b> | 0.0181  | yes   |
| mmu-miR-410    | 0.29   | 0.34   | 0.43   | -1.51  | -1.79  | -1.37  | 0.35  | -1.56 | <b>3.8</b> | 0.0034  | yes   |
| mmu-miR-376a   | 0.47   | 0.52   | 0.53   | -1.20  | -1.82  | -0.92  | 0.51  | -1.31 | <b>3.5</b> | 0.0211  | yes   |
| mmu-miR-495    | 0.32   | 0.04   | 0.30   | -1.64  | -1.97  | -1.08  | 0.22  | -1.56 | <b>3.4</b> | 0.0126  | yes   |
| mmu-miR-376c   | 0.40   | 0.29   | 0.44   | -1.59  | -1.68  | -0.75  | 0.38  | -1.34 | <b>3.3</b> | 0.0223  | yes   |
| mmu-miR-377    | 0.30   | 0.29   | 0.38   | -1.31  | -1.73  | -0.97  | 0.32  | -1.34 | <b>3.2</b> | 0.0135  | yes   |
| mmu-miR-369-3p | 0.45   | 0.12   | 0.44   | -1.11  | -1.23  | -1.11  | 0.34  | -1.15 | <b>2.8</b> | 0.0022  | yes   |
| mmu-miR-127    | 0.30   | 0.40   | 0.46   | -0.85  | -1.42  | -0.88  | 0.38  | -1.05 | <b>2.7</b> | 0.0187  | yes   |
| mmu-miR-154*   | 0.29   | 0.20   | 0.29   | -1.39  | -1.41  | -0.71  | 0.26  | -1.17 | <b>2.7</b> | 0.0220  | yes   |
| mmu-miR-379    | 0.48   | 0.33   | 0.54   | -0.92  | -1.39  | -0.42  | 0.45  | -0.91 | <b>2.6</b> | 0.0252  | yes   |
| mmu-miR-434-3p | 0.33   | 0.27   | 0.43   | -0.97  | -1.27  | -0.70  | 0.34  | -0.98 | <b>2.5</b> | 0.0083  | yes   |
| mmu-miR-134    | 0.20   | 0.20   | 0.14   | -0.96  | -1.29  | -1.03  | 0.18  | -1.09 | <b>2.4</b> | 0.0071  | yes   |
| mmu-miR-337-5p | 0.07   | 0.29   | 0.17   | -1.03  | -1.27  | -0.86  | 0.18  | -1.05 | <b>2.3</b> | 0.0173  | yes   |
| mmu-miR-323-3p | 0.07   | 0.06   | -0.01  | -1.29  | -1.39  | -0.83  | 0.04  | -1.17 | <b>2.3</b> | 0.0247  | yes   |
| mmu-miR-136    | 0.16   | 0.25   | 0.29   | -0.95  | -1.26  | -0.69  | 0.23  | -0.96 | <b>2.3</b> | 0.0178  | yes   |
| mmu-miR-431    | 0.45   | 0.35   | 0.55   | -0.64  | -0.87  | -0.53  | 0.45  | -0.68 | <b>2.2</b> | 0.0016  | yes   |
| mmu-miR-411    | 0.41   | 0.27   | 0.44   | -0.87  | -1.32  | -0.06  | 0.37  | -0.75 | <b>2.2</b> | 0.0747  | yes   |
| mmu-miR-434-5p | 0.37   | 0.38   | 0.53   | -0.59  | -1.15  | -0.32  | 0.43  | -0.69 | <b>2.2</b> | 0.0340  | yes   |
| mmu-miR-300    | 0.19   | 0.28   | 0.14   | -0.98  | -1.04  | -0.68  | 0.20  | -0.90 | <b>2.1</b> | 0.0171  | yes   |
| mmu-miR-127*   | 0.02   | 0.12   | 0.15   | -0.87  | -1.28  | -0.83  | 0.10  | -0.99 | <b>2.1</b> | 0.0205  | yes   |
| mmu-miR-433    | 0.30   | 0.30   | 0.36   | -0.65  | -0.92  | -0.65  | 0.32  | -0.74 | <b>2.1</b> | 0.0056  | yes   |
| mmu-miR-409-5p | 0.04   | -0.05  | -0.03  | -0.98  | NA     | -1.11  | -0.01 | -1.05 | <b>2.0</b> | 0.0162  | yes   |
| mmu-miR-758    | 0.41   | 0.28   | 0.36   | NA     | -0.73  | -0.57  | 0.35  | -0.65 | <b>2.0</b> | 0.0263  | yes   |
| mmu-miR-540-3p | -0.05  | 0.12   | -0.09  | -0.97  | -0.97  | -0.87  | -0.01 | -0.94 | <b>1.9</b> | 0.0087  | yes   |
| mmu-miR-380-3p | 0.49   | 0.28   | 0.38   | -0.68  | -0.77  | -0.15  | 0.38  | -0.54 | <b>1.9</b> | 0.0425  | yes   |
| mmu-miR-431*   | 0.25   | 0.45   | 0.32   | -0.51  | -0.56  | -0.48  | 0.34  | -0.52 | <b>1.8</b> | 0.0083  | yes   |
| mmu-miR-382    | 0.21   | 0.34   | 0.29   | -0.21  | -0.49  | -0.60  | 0.28  | -0.43 | <b>1.6</b> | 0.0397  | yes   |
| mmu-miR-329    | 0.11   | 0.04   | 0.19   | -0.39  | -0.69  | -0.57  | 0.11  | -0.55 | <b>1.6</b> | 0.0154  | yes   |
| mmu-miR-341    | 0.14   | 0.18   | 0.22   | -0.47  | -0.57  | -0.39  | 0.18  | -0.48 | <b>1.6</b> | 0.0051  | yes   |
| mmu-miR-485*   | 0.10   | 0.14   | 0.13   | -0.41  | -0.42  | -0.56  | 0.12  | -0.46 | <b>1.5</b> | 0.0083  | yes   |
| mmu-miR-412    | 0.02   | 0.00   | 0.11   | -0.64  | -0.55  | -0.43  | 0.04  | -0.54 | <b>1.5</b> | 0.0046  | yes   |
| mmu-miR-136*   | 0.07   | 0.12   | 0.15   | -0.55  | -0.63  | -0.12  | 0.11  | -0.43 | <b>1.5</b> | 0.0631  | yes   |
| mmu-miR-381    | -0.05  | 0.05   | -0.12  | -0.64  | -0.56  | -0.49  | -0.04 | -0.57 | <b>1.4</b> | 0.0216  | yes   |

|                     |       |       |       |       |       |       |       |       |     |         |     |
|---------------------|-------|-------|-------|-------|-------|-------|-------|-------|-----|---------|-----|
| mmu-miR-665         | 0.33  | 0.33  | 0.34  | -0.20 | -0.15 | -0.15 | 0.33  | -0.17 | 1.4 | 0.0007  | yes |
| mmu-miR-337-3p      | 0.08  | -0.20 | 0.06  | -0.63 | -0.68 | -0.24 | -0.02 | -0.52 | 1.4 | 0.0511  | yes |
| mmu-miR-299*        | 0.49  | 0.36  | 0.45  | -0.16 | -0.25 | 0.27  | 0.43  | -0.05 | 1.4 | 0.0841  | yes |
| mmu-miR-1193        | 0.18  | 0.14  | 0.10  | -0.47 | -0.36 | -0.14 | 0.14  | -0.32 | 1.4 | 0.0601  | yes |
| mmu-miR-298         | 0.13  | 0.00  | 0.02  | -0.06 | -1.03 | 0.12  | 0.05  | -0.32 | 1.3 | 0.3841  |     |
| mmu-miR-706         | -0.25 | 0.35  | 0.43  | -0.02 | -0.04 | -0.39 | 0.17  | -0.15 | 1.3 | 0.3989  |     |
| mmu-miR-666-5p      | -0.63 | -0.60 | -0.51 | -0.87 | -0.82 | -0.91 | -0.58 | -0.87 | 1.2 | 0.0355  | yes |
| mmu-miR-296-3p      | 0.05  | 0.07  | 0.07  | 0.02  | -0.72 | 0.08  | 0.06  | -0.21 | 1.2 | 0.4031  |     |
| U6-snRNA-1          | -0.07 | 0.41  | 0.09  | 0.24  | 0.33  | -0.95 | 0.14  | -0.13 | 1.2 | 0.5697  |     |
| mmu-miR-762         | -0.19 | -0.13 | -0.28 | -0.51 | -0.41 | -0.45 | -0.20 | -0.46 | 1.2 | 0.0281  |     |
| mmu-miR-184         | 0.02  | -0.02 | -0.14 | -0.31 | -0.23 | -0.31 | -0.05 | -0.28 | 1.2 | 0.0422  |     |
| U6B-5               | -0.02 | 0.19  | 0.19  | -0.01 | 0.20  | -0.48 | 0.12  | -0.10 | 1.2 | 0.4380  |     |
| mmu-miR-770-3p      | 0.00  | 0.18  | -0.02 | 0.03  | -0.04 | -0.47 | 0.05  | -0.16 | 1.2 | 0.2582  | yes |
| mmu-miR-667         | -0.18 | -0.23 | -0.33 | -0.51 | -0.35 | -0.51 | -0.25 | -0.46 | 1.2 | 0.0735  | yes |
| mmu-miR-494         | -0.05 | 0.04  | -0.11 | -0.22 | -0.25 | -0.26 | -0.04 | -0.25 | 1.2 | 0.0473  | yes |
| mmu-miR-503         | -0.05 | -0.08 | -0.20 | -0.34 | -0.33 | -0.26 | -0.11 | -0.31 | 1.1 | 0.1059  |     |
| mmu-miR-711         | 0.26  | 0.30  | 0.05  | -0.03 | 0.00  | 0.05  | 0.20  | 0.01  | 1.1 | 0.1747  |     |
| mmu-miR-296-5p      | 0.26  | 0.25  | 0.42  | 0.10  | 0.01  | 0.25  | 0.31  | 0.12  | 1.1 | 0.0166  |     |
| mmu-miR-509-3p      | 0.20  | 0.65  | 0.58  | 0.68  | 0.72  | -0.51 | 0.47  | 0.29  | 1.1 | 0.7385  |     |
| mmu-miR-351         | -0.07 | -0.01 | -0.16 | -0.27 | -0.14 | -0.33 | -0.08 | -0.25 | 1.1 | 0.0114  |     |
| mmu-miR-714         | 0.05  | 0.08  | -0.02 | -0.13 | -0.12 | -0.13 | 0.04  | -0.13 | 1.1 | 0.0273  |     |
| mmu-miR-300*        | 0.09  | 0.28  | 0.09  | 0.13  | 0.04  | -0.18 | 0.15  | 0.00  | 1.1 | 0.2410  | yes |
| mmu-miR-297a*/mmu   | -0.06 | 0.17  | 0.08  | 0.01  | -0.06 | -0.22 | 0.07  | -0.09 | 1.1 | 0.3090  |     |
| mmu-miR-688         | -0.23 | -0.21 | -0.26 | -0.46 | -0.34 | -0.32 | -0.24 | -0.37 | 1.1 | 0.1102  |     |
| mmu-miR-17*         | -0.18 | -0.09 | -0.23 | -0.50 | -0.26 | -0.14 | -0.17 | -0.30 | 1.1 | 0.3759  |     |
| mmu-miR-615-5p      | 0.07  | 0.28  | 0.20  | 0.15  | 0.28  | -0.26 | 0.18  | 0.06  | 1.1 | 0.5211  |     |
| mmu-let-7a*/mmu-let | NA    | NA    | 0.53  | 0.48  | NA    | 0.32  | 0.53  | 0.40  | 1.1 | #DIV/0! |     |
| hsa_SNORD6          | -0.34 | -0.39 | -0.26 | -0.54 | -0.46 | -0.35 | -0.33 | -0.45 | 1.1 | 0.0922  |     |
| mmu-miR-689         | -0.23 | -0.10 | 0.11  | -0.34 | -0.34 | 0.09  | -0.07 | -0.20 | 1.1 | 0.2014  |     |
| mmu-miR-487b        | -0.24 | -0.47 | -0.29 | -0.55 | -0.56 | -0.27 | -0.34 | -0.46 | 1.1 | 0.3355  | yes |
| SNORD48-5           | 0.06  | 0.44  | 0.31  | 0.41  | 0.33  | -0.30 | 0.27  | 0.15  | 1.1 | 0.7066  |     |
| mmu-miR-290-3p      | 0.02  | -0.04 | -0.04 | -0.26 | -0.07 | -0.08 | -0.02 | -0.14 | 1.1 | 0.2840  |     |
| mmu-miR-466c-5p     | 0.01  | 0.17  | 0.24  | 0.14  | 0.11  | -0.17 | 0.14  | 0.03  | 1.1 | 0.5436  |     |
| mmu-miR-210         | -0.10 | -0.17 | 0.01  | -0.14 | -0.18 | -0.28 | -0.09 | -0.20 | 1.1 | 0.3304  |     |
| U6-snRNA-2          | -0.05 | 0.10  | -0.03 | 0.07  | 0.11  | -0.51 | 0.00  | -0.11 | 1.1 | 0.6007  |     |
| mmu-miR-433*        | -0.03 | -0.01 | 0.03  | -0.09 | -0.14 | -0.11 | 0.00  | -0.11 | 1.1 | 0.0432  | yes |
| mmu-miR-466f-3p     | -0.02 | 0.29  | 0.14  | 0.18  | 0.10  | -0.20 | 0.14  | 0.03  | 1.1 | 0.5532  |     |
| mmu-miR-551b        | -0.20 | -0.10 | -0.18 | -0.18 | -0.12 | -0.51 | -0.16 | -0.27 | 1.1 | 0.4075  |     |
| mmu-miR-21*         | -0.07 | 0.00  | -0.19 | -0.07 | -0.19 | -0.34 | -0.09 | -0.20 | 1.1 | 0.1897  |     |



|                   |       |       |       |       |       |       |       |       |     |         |
|-------------------|-------|-------|-------|-------|-------|-------|-------|-------|-----|---------|
| hsa_SNORD3@       | -0.15 | 0.29  | 0.03  | 0.14  | 0.27  | -0.57 | 0.06  | -0.05 | 1.1 | 0.7159  |
| SNORD44-5         | -0.09 | 0.24  | 0.14  | 0.32  | 0.31  | -0.67 | 0.10  | -0.01 | 1.1 | 0.7912  |
| mghv-miR-M1-5     | -0.15 | -0.23 | -0.24 | -0.44 | -0.30 | -0.22 | -0.21 | -0.32 | 1.1 | 0.3528  |
| mmu-miR-181c      | -0.18 | -0.48 | -0.09 | -0.54 | -0.42 | -0.11 | -0.25 | -0.36 | 1.1 | 0.4976  |
| mmu-miR-690       | 0.11  | 0.06  | 0.09  | 0.06  | 0.10  | -0.21 | 0.09  | -0.02 | 1.1 | 0.4229  |
| mghv-miR-M1-4     | 0.01  | 0.10  | 0.02  | -0.07 | -0.01 | -0.11 | 0.04  | -0.06 | 1.1 | 0.0146  |
| mmu-miR-882       | 0.07  | 0.16  | 0.02  | 0.19  | 0.13  | -0.38 | 0.08  | -0.02 | 1.1 | 0.5740  |
| mmu-miR-466d-5p   | 0.09  | 0.20  | 0.17  | 0.30  | 0.21  | -0.36 | 0.15  | 0.05  | 1.1 | 0.6860  |
| mmu-miR-130b*     | 0.17  | 0.27  | 0.21  | 0.18  | 0.21  | -0.05 | 0.22  | 0.11  | 1.1 | 0.3436  |
| mmu-miR-466i      | -0.09 | 0.27  | 0.09  | 0.15  | 0.06  | -0.24 | 0.09  | -0.01 | 1.1 | 0.6206  |
| mmu-miR-710       | 0.01  | 0.10  | -0.02 | -0.08 | 0.07  | -0.20 | 0.03  | -0.07 | 1.1 | 0.1596  |
| mcmv-miR-M23-1-5p | -0.13 | -0.18 | -0.30 | -0.41 | -0.36 | -0.13 | -0.20 | -0.30 | 1.1 | 0.5598  |
| mmu-miR-669e      | 0.04  | 0.25  | 0.30  | 0.26  | 0.24  | -0.19 | 0.19  | 0.10  | 1.1 | 0.7073  |
| mmu-miR-330*      | -0.30 | -0.34 | -0.42 | -0.50 | -0.41 | -0.41 | -0.35 | -0.44 | 1.1 | 0.2730  |
| mmu-miR-696       | 0.27  | NA    | 0.14  | 0.12  | NA    | NA    | 0.20  | 0.12  | 1.1 | #DIV/0! |
| mmu-miR-196a*     | -0.56 | -0.12 | -0.33 | -0.18 | -0.17 | -0.90 | -0.34 | -0.42 | 1.1 | 0.7966  |
| mmu-miR-467g      | 0.00  | 0.29  | 0.16  | 0.22  | 0.12  | -0.14 | 0.15  | 0.07  | 1.1 | 0.6577  |
| mmu-miR-705       | 0.10  | 0.15  | -0.02 | -0.07 | 0.00  | 0.07  | 0.08  | 0.00  | 1.1 | 0.4517  |
| mmu-let-7b        | 0.10  | 0.10  | 0.13  | 0.12  | 0.07  | -0.09 | 0.11  | 0.03  | 1.1 | 0.3906  |
| mmu-miR-466b-5p   | -0.04 | 0.23  | 0.10  | 0.20  | 0.15  | -0.29 | 0.10  | 0.02  | 1.1 | 0.7166  |
| hsa_SNORD13       | 0.11  | 0.14  | 0.08  | -0.14 | -0.07 | 0.33  | 0.11  | 0.04  | 1.1 | 0.6999  |
| mmu-miR-292-3p    | -0.02 | 0.15  | 0.17  | -0.10 | 0.15  | 0.03  | 0.10  | 0.03  | 1.1 | 0.2363  |
| mmu-miR-468       | 0.01  | 0.19  | 0.16  | 0.22  | 0.19  | -0.26 | 0.12  | 0.05  | 1.1 | 0.7363  |
| mmu-miR-763       | -0.20 | -0.12 | -0.18 | -0.03 | -0.05 | -0.62 | -0.17 | -0.23 | 1.0 | 0.7557  |
| mmu-miR-874       | -0.32 | -0.32 | -0.53 | -0.62 | -0.49 | -0.26 | -0.39 | -0.46 | 1.0 | 0.7352  |
| mmu-miR-467e*     | -0.07 | 0.22  | 0.06  | 0.16  | 0.06  | -0.21 | 0.07  | 0.00  | 1.0 | 0.6997  |
| mmu-miR-466h      | 0.19  | 0.16  | 0.18  | 0.06  | NA    | 0.16  | 0.17  | 0.11  | 1.0 | 0.4093  |
| mmu-miR-301b      | 0.49  | 0.03  | 0.13  | -0.20 | -0.04 | 0.69  | 0.22  | 0.15  | 1.0 | 0.8720  |
| mghv-miR-M1-8     | 0.05  | 0.15  | 0.01  | 0.08  | 0.14  | -0.21 | 0.07  | 0.01  | 1.0 | 0.5062  |
| mmu-miR-503*      | 0.07  | 0.05  | 0.07  | -0.04 | 0.01  | 0.02  | 0.06  | 0.00  | 1.0 | 0.1117  |
| mmu-miR-669d/mmu  | 0.06  | 0.29  | 0.20  | 0.29  | 0.30  | -0.22 | 0.18  | 0.12  | 1.0 | 0.7728  |
| mmu-miR-346       | 0.09  | 0.06  | 0.03  | -0.06 | -0.05 | 0.10  | 0.06  | 0.00  | 1.0 | 0.4575  |
| mmu-miR-30b*      | 0.06  | 0.35  | 0.27  | 0.30  | 0.39  | -0.19 | 0.22  | 0.16  | 1.0 | 0.8053  |
| mmu-miR-883b-5p   | -0.09 | 0.04  | -0.14 | -0.11 | -0.03 | -0.23 | -0.06 | -0.12 | 1.0 | 0.0852  |
| mmu-miR-671-5p    | -0.36 | -0.29 | -0.31 | -0.48 | -0.49 | -0.16 | -0.32 | -0.38 | 1.0 | 0.6460  |
| mmu-miR-1196      | -0.05 | 0.04  | 0.00  | -0.05 | 0.03  | -0.16 | 0.00  | -0.06 | 1.0 | 0.3840  |
| mmu-miR-183*      | -0.08 | -0.11 | -0.19 | -0.23 | -0.15 | -0.15 | -0.13 | -0.18 | 1.0 | 0.4290  |
| mmu-miR-542-5p    | -0.14 | -0.02 | -0.14 | -0.08 | -0.02 | -0.35 | -0.10 | -0.15 | 1.0 | 0.5974  |
| mmu-miR-129-5p    | 0.17  | 0.24  | 0.19  | 0.21  | 0.16  | 0.07  | 0.20  | 0.15  | 1.0 | 0.3791  |

yes

|                   |       |       |       |       |       |       |       |       |     |        |
|-------------------|-------|-------|-------|-------|-------|-------|-------|-------|-----|--------|
| mmu-miR-99b*      | 0.00  | 0.02  | 0.11  | 0.05  | 0.06  | -0.13 | 0.04  | -0.01 | 1.0 | 0.6502 |
| mmu-miR-200b*     | 0.15  | -0.05 | -0.18 | -0.19 | -0.04 | 0.00  | -0.03 | -0.08 | 1.0 | 0.7740 |
| mmu-miR-712*      | 0.30  | 0.13  | 0.07  | -0.13 | 0.05  | 0.44  | 0.17  | 0.12  | 1.0 | 0.8505 |
| mmu-miR-130b      | 0.10  | 0.04  | 0.10  | 0.00  | 0.11  | -0.01 | 0.08  | 0.03  | 1.0 | 0.4946 |
| mmu-miR-490       | -0.28 | -0.19 | -0.32 | -0.30 | -0.24 | -0.39 | -0.26 | -0.31 | 1.0 | 0.0581 |
| mmu-miR-455       | -0.42 | -0.42 | -0.54 | -0.74 | -0.61 | -0.18 | -0.46 | -0.51 | 1.0 | 0.8395 |
| mmu-miR-1192      | 0.09  | 0.23  | 0.26  | 0.39  | 0.26  | -0.22 | 0.19  | 0.14  | 1.0 | 0.8560 |
| mmu-miR-1959      | 0.01  | -0.03 | 0.02  | -0.09 | -0.10 | 0.04  | 0.00  | -0.05 | 1.0 | 0.3200 |
| mmu-miR-744       | 0.04  | 0.06  | -0.08 | -0.03 | -0.09 | 0.02  | 0.01  | -0.03 | 1.0 | 0.6246 |
| mmu-miR-325       | -0.21 | 0.01  | -0.11 | -0.06 | -0.12 | -0.27 | -0.10 | -0.15 | 1.0 | 0.7181 |
| mmu-miR-721       | -0.25 | -0.15 | -0.32 | -0.23 | -0.23 | -0.38 | -0.24 | -0.28 | 1.0 | 0.3351 |
| mmu-miR-685       | 0.14  | 0.15  | -0.03 | 0.12  | 0.17  | -0.16 | 0.08  | 0.04  | 1.0 | 0.4659 |
| mmu-miR-695       | -0.13 | 0.05  | -0.22 | -0.06 | -0.15 | -0.21 | -0.10 | -0.14 | 1.0 | 0.6747 |
| mg hv-miR-M1-3    | -0.11 | -0.01 | -0.13 | 0.03  | -0.07 | -0.32 | -0.08 | -0.12 | 1.0 | 0.7288 |
| mmu-miR-669h-3p   | -0.02 | 0.16  | 0.02  | 0.10  | 0.11  | -0.17 | 0.05  | 0.01  | 1.0 | 0.7079 |
| mmu-miR-326       | -0.23 | -0.14 | -0.19 | -0.25 | -0.17 | -0.24 | -0.18 | -0.22 | 1.0 | 0.0525 |
| mmu-miR-133b      | 0.40  | 0.49  | 0.43  | 0.35  | 0.34  | 0.51  | 0.44  | 0.40  | 1.0 | 0.6349 |
| mg hv-miR-M1-2    | 0.77  | 0.89  | 0.77  | 0.74  | 0.74  | 0.84  | 0.81  | 0.77  | 1.0 | 0.6047 |
| mmu-miR-678       | -0.15 | 0.12  | -0.01 | 0.06  | 0.03  | -0.24 | -0.02 | -0.05 | 1.0 | 0.8067 |
| mg hv-miR-M1-7-3p | 0.10  | 0.07  | 0.10  | 0.02  | -0.04 | 0.18  | 0.09  | 0.05  | 1.0 | 0.6261 |
| mmu-miR-1187      | 0.14  | 0.24  | 0.14  | 0.25  | 0.25  | -0.07 | 0.17  | 0.14  | 1.0 | 0.7522 |
| mmu-miR-295*      | -0.10 | -0.22 | 0.09  | -0.35 | -0.14 | 0.16  | -0.08 | -0.11 | 1.0 | 0.7947 |
| mmu-miR-30c-1*    | 0.00  | 0.05  | -0.03 | -0.04 | 0.01  | -0.04 | 0.01  | -0.02 | 1.0 | 0.0717 |
| mmu-miR-124       | 0.20  | 0.01  | 0.24  | 0.00  | 0.31  | 0.06  | 0.15  | 0.12  | 1.0 | 0.8662 |
| mmu-miR-150       | -0.11 | -0.10 | -0.25 | -0.28 | -0.14 | -0.13 | -0.15 | -0.18 | 1.0 | 0.7497 |
| mmu-miR-295       | 0.14  | -0.02 | 0.28  | 0.00  | 0.13  | 0.19  | 0.13  | 0.11  | 1.0 | 0.7918 |
| mmu-miR-881*      | -0.01 | 0.12  | -0.04 | 0.22  | 0.18  | -0.41 | 0.02  | 0.00  | 1.0 | 0.8987 |
| mmu-miR-10a*      | -0.10 | 0.01  | -0.13 | -0.15 | -0.11 | -0.03 | -0.07 | -0.10 | 1.0 | 0.7367 |
| mmu-miR-34b-3p    | -0.05 | 0.00  | -0.01 | -0.02 | -0.07 | -0.05 | -0.02 | -0.05 | 1.0 | 0.4505 |
| mmu-miR-294*      | 0.10  | -0.13 | 0.05  | -0.13 | 0.00  | 0.07  | 0.00  | -0.02 | 1.0 | 0.8439 |
| hsa-miR-291a-5p   | 0.20  | -0.14 | 0.06  | 0.01  | 0.17  | -0.13 | 0.04  | 0.02  | 1.0 | 0.8991 |
| hsa_SNORD12       | -0.05 | 0.02  | -0.02 | -0.12 | -0.04 | 0.04  | -0.01 | -0.04 | 1.0 | 0.6304 |
| mmu-miR-20b*      | -0.35 | -0.13 | -0.06 | -0.31 | -0.40 | 0.09  | -0.18 | -0.21 | 1.0 | 0.8721 |
| mmu-miR-691       | -0.01 | 0.08  | 0.22  | -0.09 | -0.15 | 0.46  | 0.09  | 0.07  | 1.0 | 0.8855 |
| mmu-miR-291a-3p   | -0.06 | -0.37 | 0.01  | -0.35 | -0.13 | 0.00  | -0.14 | -0.16 | 1.0 | 0.8997 |
| mmu-miR-1198      | 0.26  | 0.28  | 0.27  | 0.24  | 0.30  | 0.21  | 0.27  | 0.25  | 1.0 | 0.4287 |
| mmu-miR-883a-5p   | -0.04 | 0.05  | 0.10  | 0.21  | 0.14  | -0.31 | 0.04  | 0.01  | 1.0 | 0.9243 |
| mmu-miR-467h      | -0.04 | 0.17  | 0.07  | 0.08  | 0.07  | 0.00  | 0.07  | 0.05  | 1.0 | 0.8155 |
| mmu-miR-669i      | -0.21 | 0.12  | -0.07 | 0.01  | -0.02 | -0.21 | -0.05 | -0.07 | 1.0 | 0.8951 |

|                 |       |       |       |       |       |       |       |       |     |         |
|-----------------|-------|-------|-------|-------|-------|-------|-------|-------|-----|---------|
| mmu-miR-197     | -0.27 | 0.02  | -0.02 | -0.25 | -0.18 | 0.11  | -0.09 | -0.11 | 1.0 | 0.8841  |
| mmu-miR-542-3p  | -0.03 | -0.07 | 0.02  | -0.04 | -0.03 | -0.06 | -0.03 | -0.04 | 1.0 | 0.6956  |
| mmu-miR-16*     | -0.12 | 0.05  | 0.00  | 0.12  | 0.09  | -0.32 | -0.02 | -0.04 | 1.0 | 0.9385  |
| mmu-miR-574-5p  | 0.01  | 0.23  | 0.10  | 0.29  | 0.23  | -0.21 | 0.11  | 0.10  | 1.0 | 0.9464  |
| mmu-miR-138*    | -0.07 | 0.03  | -0.10 | -0.11 | -0.06 | -0.02 | -0.05 | -0.06 | 1.0 | 0.8294  |
| mmu-miR-181d    | 0.16  | -0.09 | 0.07  | -0.10 | 0.00  | 0.20  | 0.04  | 0.04  | 1.0 | 0.9503  |
| mmu-miR-467f    | -0.11 | 0.11  | -0.03 | 0.14  | 0.03  | -0.23 | -0.01 | -0.02 | 1.0 | 0.9534  |
| mmu-miR-470     | -0.19 | -0.11 | -0.09 | -0.18 | -0.18 | -0.05 | -0.13 | -0.14 | 1.0 | 0.8420  |
| mmu-miR-324-3p  | 0.26  | 0.13  | 0.14  | 0.09  | NA    | 0.25  | 0.18  | 0.17  | 1.0 | 0.8669  |
| mmu-miR-715     | 0.52  | 0.51  | 0.56  | 0.43  | 0.56  | 0.58  | 0.53  | 0.52  | 1.0 | 0.9235  |
| mmu-miR-709     | 0.11  | 0.07  | 0.26  | -0.01 | -0.12 | 0.56  | 0.15  | 0.14  | 1.0 | 0.9798  |
| mmu-miR-293     | 0.08  | -0.11 | 0.28  | -0.22 | -0.08 | 0.53  | 0.08  | 0.08  | 1.0 | 0.9845  |
| mmu-miR-465a-5p | NA    | NA    | 0.11  | NA    | NA    | 0.11  | 0.11  | 0.11  | 1.0 | #DIV/0! |
| mmu-miR-466a-5p | 0.04  | 0.23  | 0.16  | 0.31  | 0.27  | -0.15 | 0.14  | 0.14  | 1.0 | 0.9876  |
| mmu-miR-344     | -0.01 | -0.12 | 0.11  | -0.18 | -0.01 | 0.16  | -0.01 | -0.01 | 1.0 | 0.9778  |
| mmu-miR-181b    | 0.33  | NA    | NA    | 0.42  | 0.28  | 0.27  | 0.33  | 0.32  | 1.0 | #DIV/0! |
| mmu-miR-877     | -0.07 | -0.02 | -0.08 | -0.02 | 0.05  | -0.21 | -0.06 | -0.06 | 1.0 | 0.9893  |
| mmu-miR-466e-5p | 0.02  | 0.16  | 0.15  | 0.24  | 0.22  | -0.13 | 0.11  | 0.11  | 1.0 | 0.9957  |
| mmu-miR-291b-5p | 0.30  | -0.17 | 0.01  | 0.11  | 0.23  | -0.19 | 0.05  | 0.05  | 1.0 | 0.9921  |
| mmu-miR-872*    | -0.24 | -0.32 | -0.27 | -0.40 | -0.24 | -0.18 | -0.28 | -0.28 | 1.0 | 0.9791  |
| mmu-miR-712     | -0.10 | 0.00  | 0.03  | 0.07  | 0.07  | -0.21 | -0.02 | -0.02 | 1.0 | 0.9824  |
| hsa_SNORD14B    | 0.07  | 0.25  | 0.17  | 0.05  | 0.06  | 0.39  | 0.16  | 0.17  | 1.0 | 0.9746  |
| mmu-miR-881     | -0.14 | 0.00  | -0.24 | -0.01 | -0.12 | -0.24 | -0.13 | -0.12 | 1.0 | 0.9505  |
| mmu-miR-215     | -0.20 | -0.24 | -0.22 | -0.08 | -0.07 | -0.49 | -0.22 | -0.22 | 1.0 | 0.9687  |
| mmu-miR-465c-5p | -0.09 | -0.08 | -0.13 | -0.20 | -0.10 | 0.03  | -0.10 | -0.09 | 1.0 | 0.9345  |
| mmu-miR-582-3p  | -0.27 | -0.33 | -0.18 | -0.22 | -0.26 | -0.27 | -0.26 | -0.25 | 1.0 | 0.8775  |
| mmu-miR-294     | 0.00  | 0.03  | 0.17  | -0.08 | 0.09  | 0.21  | 0.07  | 0.07  | 1.0 | 0.8496  |
| mmu-miR-345-5p  | -0.17 | -0.25 | -0.40 | -0.36 | -0.30 | -0.13 | -0.27 | -0.26 | 1.0 | 0.9469  |
| mmu-miR-761     | -0.41 | NA    | NA    | NA    | -0.27 | -0.52 | -0.41 | -0.40 | 1.0 | #DIV/0! |
| mmu-miR-675-5p  | -0.06 | -0.11 | -0.14 | -0.09 | 0.04  | -0.23 | -0.10 | -0.09 | 1.0 | 0.8872  |
| mmu-miR-292-5p  | -0.23 | -0.35 | -0.07 | -0.35 | -0.16 | -0.10 | -0.22 | -0.20 | 1.0 | 0.9037  |
| mmu-miR-1186    | 0.21  | 0.17  | 0.27  | 0.18  | 0.13  | 0.38  | 0.22  | 0.23  | 1.0 | 0.8157  |
| mmu-miR-20a*    | -0.12 | -0.06 | 0.04  | -0.08 | -0.07 | 0.05  | -0.05 | -0.03 | 1.0 | 0.4132  |
| mmu-let-7e      | 0.17  | 0.17  | 0.08  | 0.00  | 0.00  | 0.46  | 0.14  | 0.15  | 1.0 | 0.9439  |
| mmu-miR-322     | 0.07  | -0.25 | -0.16 | -0.04 | -0.09 | -0.16 | -0.11 | -0.10 | 1.0 | 0.8695  |
| mmu-miR-484     | 0.12  | 0.07  | 0.28  | 0.20  | 0.12  | 0.20  | 0.16  | 0.17  | 1.0 | 0.7844  |
| mmu-miR-693-5p  | -0.19 | -0.06 | -0.11 | -0.02 | -0.02 | -0.26 | -0.12 | -0.10 | 1.0 | 0.8625  |
| mmu-miR-465b-5p | -0.10 | -0.11 | 0.00  | -0.06 | 0.10  | -0.20 | -0.07 | -0.05 | 1.0 | 0.8837  |
| mmu-miR-466f-5p | 0.05  | 0.29  | 0.13  | 0.29  | 0.27  | -0.02 | 0.16  | 0.18  | 1.0 | 0.8675  |

|                   |       |       |       |       |       |       |       |       |     |        |     |
|-------------------|-------|-------|-------|-------|-------|-------|-------|-------|-----|--------|-----|
| 5SrRNA-5          | 0.07  | 0.14  | 0.16  | 0.14  | 0.17  | 0.12  | 0.12  | 0.14  | 1.0 | 0.5435 |     |
| mmu-miR-875-3p    | -0.04 | -0.04 | 0.07  | 0.01  | -0.01 | 0.06  | 0.00  | 0.02  | 1.0 | 0.3477 |     |
| mmu-miR-9*        | -0.21 | -0.27 | -0.32 | -0.42 | -0.35 | 0.03  | -0.27 | -0.24 | 1.0 | 0.8988 |     |
| mmu-miR-205       | 0.17  | 0.31  | 0.29  | 0.22  | 0.41  | 0.23  | 0.26  | 0.28  | 1.0 | 0.6506 |     |
| mmu-miR-129-3p    | -0.22 | -0.10 | -0.06 | -0.08 | -0.22 | 0.00  | -0.13 | -0.10 | 1.0 | 0.7615 |     |
| mmu-miR-328       | 0.48  | 0.50  | 0.58  | 0.48  | 0.58  | 0.57  | 0.52  | 0.55  | 1.0 | 0.4349 |     |
| mmu-miR-450b-3p   | -0.20 | -0.20 | -0.19 | -0.17 | -0.17 | NA    | -0.20 | -0.17 | 1.0 | 0.0123 |     |
| mmu-miR-125b-3p   | -0.10 | 0.06  | 0.01  | 0.15  | 0.10  | -0.18 | -0.01 | 0.02  | 1.0 | 0.8403 |     |
| mmu-miR-29b*      | 0.57  | 0.54  | 0.39  | 0.58  | 0.60  | 0.42  | 0.50  | 0.53  | 1.0 | 0.2197 |     |
| mmu-miR-669c/mmu- | 0.03  | 0.24  | 0.20  | 0.29  | 0.25  | 0.02  | 0.16  | 0.19  | 1.0 | 0.8288 |     |
| mmu-miR-615-3p    | 0.05  | 0.00  | 0.03  | 0.04  | 0.08  | 0.06  | 0.03  | 0.06  | 1.0 | 0.2930 |     |
| mmu-miR-293*      | 0.03  | -0.26 | 0.14  | -0.44 | -0.23 | 0.67  | -0.03 | 0.00  | 1.0 | 0.9164 |     |
| mmu-miR-301a      | 0.57  | 0.02  | 0.20  | -0.13 | 0.05  | 0.98  | 0.26  | 0.30  | 1.0 | 0.9428 |     |
| mmu-miR-183       | 0.29  | -0.16 | 0.14  | -0.06 | 0.24  | 0.20  | 0.09  | 0.13  | 1.0 | 0.8773 |     |
| mmu-miR-675-3p    | -0.07 | -0.19 | -0.14 | -0.18 | -0.06 | -0.05 | -0.13 | -0.10 | 1.0 | 0.6651 |     |
| mmu-miR-106b*     | -0.01 | -0.14 | 0.19  | 0.06  | 0.13  | -0.04 | 0.01  | 0.05  | 1.0 | 0.8194 |     |
| mmu-miR-297c      | -0.08 | 0.13  | 0.00  | 0.06  | 0.06  | 0.05  | 0.02  | 0.06  | 1.0 | 0.5477 |     |
| mmu-miR-713       | -0.36 | -0.24 | -0.38 | -0.23 | -0.23 | -0.40 | -0.33 | -0.29 | 1.0 | 0.4365 |     |
| mmu-let-7c        | 0.19  | 0.21  | 0.16  | 0.31  | 0.24  | 0.13  | 0.19  | 0.23  | 1.0 | 0.4587 |     |
| mmu-miR-467b*     | -0.32 | 0.09  | -0.06 | -0.11 | -0.12 | 0.06  | -0.10 | -0.06 | 1.0 | 0.7717 |     |
| mmu-miR-708       | 0.22  | -0.40 | 0.13  | -0.31 | -0.12 | 0.51  | -0.02 | 0.03  | 1.0 | 0.8926 |     |
| mmu-miR-668       | -0.13 | 0.10  | -0.17 | -0.03 | -0.10 | 0.06  | -0.07 | -0.02 | 1.0 | 0.7525 | yes |
| mmu-miR-101a      | 0.17  | -0.31 | -0.17 | -0.22 | -0.14 | 0.20  | -0.10 | -0.05 | 1.0 | 0.8502 |     |
| mmu-miR-423-5p    | -0.11 | -0.04 | -0.13 | 0.05  | 0.01  | -0.19 | -0.09 | -0.04 | 1.0 | 0.5271 |     |
| mmu-miR-361       | 0.06  | 0.02  | -0.05 | 0.03  | 0.07  | 0.09  | 0.01  | 0.06  | 1.0 | 0.4039 |     |
| mmu-miR-669f      | -0.08 | 0.23  | 0.08  | 0.08  | 0.03  | 0.28  | 0.08  | 0.13  | 1.0 | 0.7195 |     |
| mmu-miR-182       | 0.41  | -0.27 | 0.11  | -0.05 | 0.21  | 0.26  | 0.08  | 0.14  | 1.0 | 0.8629 |     |
| mmu-miR-290-5p    | -0.05 | -0.36 | -0.15 | -0.38 | -0.17 | 0.16  | -0.19 | -0.13 | 1.0 | 0.8085 |     |
| mmu-miR-363       | 0.05  | 0.05  | 0.05  | -0.32 | -0.23 | 0.87  | 0.05  | 0.11  | 1.0 | 0.8997 |     |
| mmu-miR-33        | 0.28  | 0.14  | 0.36  | 0.27  | 0.15  | 0.54  | 0.26  | 0.32  | 1.0 | 0.4473 |     |
| mmu-miR-686       | -0.08 | 0.02  | -0.02 | 0.14  | 0.17  | -0.21 | -0.03 | 0.03  | 1.0 | 0.6882 |     |
| mmu-miR-673-3p    | -0.13 | 0.01  | -0.26 | -0.10 | -0.03 | NA    | -0.13 | -0.06 | 1.0 | 0.9260 | yes |
| mmu-miR-483*      | 0.31  | 0.30  | 0.20  | 0.21  | 0.41  | 0.38  | 0.27  | 0.34  | 1.0 | 0.5282 |     |
| mmu-miR-208a      | -0.58 | -0.39 | -0.49 | -0.50 | -0.35 | -0.42 | -0.49 | -0.42 | 1.0 | 0.0445 |     |
| mmu-miR-92a*      | -0.07 | 0.06  | 0.14  | 0.22  | 0.08  | 0.04  | 0.04  | 0.11  | 1.0 | 0.6293 |     |
| mmu-miR-423-3p    | -0.20 | -0.19 | -0.24 | -0.11 | -0.07 | -0.25 | -0.21 | -0.14 | 1.0 | 0.2433 |     |
| mmu-miR-697       | -0.25 | -0.36 | -0.21 | -0.10 | -0.21 | -0.30 | -0.27 | -0.20 | 1.0 | 0.4926 |     |
| mmu-miR-471       | -0.43 | -0.27 | -0.40 | -0.09 | -0.25 | -0.54 | -0.36 | -0.30 | 1.0 | 0.6750 |     |
| mmu-miR-338-5p    | 0.03  | 0.00  | -0.05 | -0.04 | 0.04  | 0.20  | -0.01 | 0.07  | 1.0 | 0.5235 |     |

|                   |       |       |       |       |       |       |       |       |            |         |
|-------------------|-------|-------|-------|-------|-------|-------|-------|-------|------------|---------|
| mmu-miR-375       | -0.23 | -0.27 | -0.27 | -0.19 | -0.23 | -0.13 | -0.26 | -0.18 | <b>0.9</b> | 0.1711  |
| mmu-miR-672       | 0.33  | 0.18  | 0.37  | 0.43  | 0.57  | 0.11  | 0.29  | 0.37  | <b>0.9</b> | 0.7162  |
| mmu-miR-195       | -0.03 | -0.26 | -0.09 | -0.30 | -0.20 | 0.37  | -0.12 | -0.04 | <b>0.9</b> | 0.7411  |
| mmu-miR-339-5p    | -0.17 | -0.20 | -0.16 | -0.19 | -0.10 | 0.01  | -0.18 | -0.10 | <b>0.9</b> | 0.2839  |
| SNORD38B-5        | 0.09  | 0.01  | 0.10  | 0.04  | 0.05  | 0.35  | 0.07  | 0.15  | <b>0.9</b> | 0.4601  |
| mmu-miR-30e*      | 0.16  | 0.06  | 0.14  | 0.07  | 0.17  | 0.38  | 0.12  | 0.20  | <b>0.9</b> | 0.4727  |
| mmu-miR-466g      | -0.59 | -0.14 | -0.36 | -0.29 | -0.37 | -0.17 | -0.36 | -0.28 | <b>0.9</b> | 0.6551  |
| mmu-miR-1274a     | -0.16 | -0.29 | -0.09 | -0.10 | -0.04 | -0.15 | -0.18 | -0.10 | <b>0.9</b> | 0.4543  |
| mcmv-miR-m88-1    | -0.32 | -0.39 | -0.29 | -0.27 | -0.27 | -0.20 | -0.33 | -0.25 | <b>0.9</b> | 0.0635  |
| mmu-miR-674       | 0.16  | 0.07  | 0.04  | 0.10  | 0.21  | 0.21  | 0.09  | 0.17  | <b>0.9</b> | 0.3558  |
| mmu-miR-674*      | 0.09  | -0.22 | -0.10 | -0.06 | 0.06  | 0.04  | -0.07 | 0.01  | <b>0.9</b> | 0.5677  |
| mmu-let-7d*       | 0.17  | 0.31  | 0.26  | 0.35  | 0.33  | NA    | 0.25  | 0.34  | <b>0.9</b> | 0.4572  |
| mmu-miR-702       | 0.22  | 0.23  | 0.17  | NA    | 0.30  | 0.28  | 0.20  | 0.29  | <b>0.9</b> | 0.1226  |
| mmu-let-7b*       | 0.06  | NA    | NA    | NA    | 0.18  | 0.13  | 0.06  | 0.15  | <b>0.9</b> | #DIV/0! |
| mmu-miR-130a      | 0.23  | -0.06 | 0.05  | -0.03 | 0.07  | 0.45  | 0.08  | 0.17  | <b>0.9</b> | 0.6840  |
| mmu-miR-677       | 0.14  | -0.01 | 0.05  | -0.01 | 0.10  | 0.36  | 0.06  | 0.15  | <b>0.9</b> | 0.5549  |
| mmu-miR-804       | -0.02 | -0.03 | -0.02 | -0.04 | 0.04  | 0.21  | -0.02 | 0.07  | <b>0.9</b> | 0.3454  |
| mmu-miR-185       | -0.11 | -0.10 | -0.13 | 0.14  | -0.05 | -0.13 | -0.11 | -0.02 | <b>0.9</b> | 0.3462  |
| mmu-miR-342-3p    | -0.19 | -0.36 | -0.25 | -0.30 | -0.35 | 0.16  | -0.26 | -0.17 | <b>0.9</b> | 0.5955  |
| hsa_SNORD2        | -0.04 | 0.01  | -0.03 | 0.04  | -0.04 | 0.24  | -0.02 | 0.08  | <b>0.9</b> | 0.4001  |
| mmu-miR-879*      | 0.25  | 0.18  | 0.05  | 0.20  | 0.22  | 0.37  | 0.16  | 0.26  | <b>0.9</b> | 0.4541  |
| mmu-miR-207       | -0.05 | -0.23 | -0.01 | -0.01 | 0.00  | 0.03  | -0.10 | 0.01  | <b>0.9</b> | 0.2358  |
| mmu-miR-191*      | 0.05  | -0.16 | 0.01  | 0.02  | 0.10  | 0.10  | -0.03 | 0.07  | <b>0.9</b> | 0.3318  |
| mmu-miR-223       | 0.18  | 0.03  | 0.12  | 0.25  | 0.24  | 0.15  | 0.11  | 0.22  | <b>0.9</b> | 0.1845  |
| mmu-miR-28*       | 0.04  | -0.09 | -0.07 | 0.13  | 0.06  | 0.01  | -0.04 | 0.07  | <b>0.9</b> | 0.0448  |
| mmu-miR-190b      | 0.60  | 0.56  | 0.33  | 0.66  | 0.56  | 0.59  | 0.50  | 0.61  | <b>0.9</b> | 0.2958  |
| mmu-miR-15b       | 0.34  | 0.17  | 0.13  | 0.02  | 0.21  | 0.74  | 0.21  | 0.32  | <b>0.9</b> | 0.7287  |
| mmu-miR-18a       | 0.03  | -0.07 | -0.09 | -0.16 | -0.01 | 0.38  | -0.04 | 0.07  | <b>0.9</b> | 0.6282  |
| mmu-miR-19b       | 0.02  | 0.00  | 0.10  | 0.11  | 0.09  | 0.25  | 0.04  | 0.15  | <b>0.9</b> | 0.0276  |
| mmu-miR-654-3p    | 0.09  | 0.14  | NA    | 0.28  | 0.23  | 0.17  | 0.11  | 0.23  | <b>0.9</b> | 0.2041  |
| mmu-miR-125a-3p   | 0.01  | 0.01  | -0.09 | 0.08  | 0.15  | 0.04  | -0.02 | 0.09  | <b>0.9</b> | 0.0329  |
| mmu-miR-101b      | -0.07 | -0.34 | -0.09 | -0.35 | -0.24 | 0.43  | -0.17 | -0.05 | <b>0.9</b> | 0.6713  |
| mmu-miR-362-3p    | -0.11 | -0.28 | -0.13 | -0.10 | -0.13 | 0.07  | -0.17 | -0.05 | <b>0.9</b> | 0.1713  |
| mmu-miR-500       | -0.24 | -0.28 | NA    | -0.13 | -0.15 | -0.16 | -0.26 | -0.15 | <b>0.9</b> | 0.0496  |
| mmu-miR-467a*/mmu | -0.28 | 0.07  | -0.12 | -0.05 | -0.16 | 0.23  | -0.11 | 0.01  | <b>0.9</b> | 0.5733  |
| mmu-miR-669a      | -0.15 | 0.23  | 0.01  | 0.16  | 0.05  | 0.24  | 0.03  | 0.15  | <b>0.9</b> | 0.5152  |
| mmu-miR-467e      | -0.24 | -0.01 | -0.06 | -0.03 | -0.11 | 0.18  | -0.10 | 0.02  | <b>0.9</b> | 0.3744  |
| mmu-miR-805       | 0.17  | 0.09  | 0.22  | -0.18 | 0.04  | 0.98  | 0.16  | 0.28  | <b>0.9</b> | 0.7476  |
| mmu-miR-320       | -0.13 | -0.06 | 0.04  | 0.10  | 0.04  | 0.08  | -0.05 | 0.07  | <b>0.9</b> | 0.1518  |

yes

|                   |       |       |       |       |       |       |       |       |            |         |
|-------------------|-------|-------|-------|-------|-------|-------|-------|-------|------------|---------|
| mmu-miR-383       | -0.13 | -0.26 | -0.11 | -0.03 | -0.03 | -0.07 | -0.16 | -0.04 | <b>0.9</b> | 0.1584  |
| mmu-miR-720       | -0.04 | -0.19 | -0.09 | 0.02  | 0.00  | 0.04  | -0.11 | 0.02  | <b>0.9</b> | 0.0728  |
| mmu-miR-191       | 0.09  | -0.12 | 0.14  | 0.13  | 0.25  | 0.11  | 0.04  | 0.16  | <b>0.9</b> | 0.4155  |
| mmu-miR-107       | 0.17  | -0.22 | 0.01  | -0.11 | -0.07 | 0.52  | -0.01 | 0.11  | <b>0.9</b> | 0.6389  |
| mmu-miR-30c       | 0.11  | -0.23 | 0.02  | -0.05 | 0.06  | 0.26  | -0.04 | 0.09  | <b>0.9</b> | 0.4598  |
| mmu-miR-103       | 0.16  | -0.21 | -0.04 | -0.03 | 0.10  | 0.24  | -0.03 | 0.10  | <b>0.9</b> | 0.5083  |
| mmu-miR-135a      | 0.41  | NA    | NA    | 0.37  | NA    | 0.71  | 0.41  | 0.54  | <b>0.9</b> | #DIV/0! |
| mmu-miR-877*      | 0.93  | 0.90  | 0.89  | 1.07  | 1.09  | 0.95  | 0.90  | 1.04  | <b>0.9</b> | 0.0769  |
| mmu-miR-186       | 0.03  | -0.02 | -0.08 | 0.09  | 0.13  | 0.11  | -0.02 | 0.11  | <b>0.9</b> | 0.0791  |
| mmu-miR-25        | -0.02 | -0.19 | -0.01 | 0.10  | 0.20  | -0.09 | -0.07 | 0.07  | <b>0.9</b> | 0.4063  |
| mmu-miR-297a      | -0.23 | 0.11  | -0.01 | 0.00  | -0.12 | 0.43  | -0.04 | 0.10  | <b>0.9</b> | 0.5462  |
| mmu-miR-7a        | 0.11  | -0.24 | 0.20  | 0.01  | 0.07  | 0.43  | 0.02  | 0.17  | <b>0.9</b> | 0.3780  |
| mmu-miR-331-3p    | -0.30 | NA    | NA    | NA    | -0.29 | -0.03 | -0.30 | -0.16 | <b>0.9</b> | #DIV/0! |
| mmu-miR-34c*      | -0.40 | -0.27 | -0.31 | -0.07 | -0.09 | -0.38 | -0.33 | -0.18 | <b>0.9</b> | 0.3316  |
| mmu-miR-148a      | -0.23 | -0.71 | -0.09 | -0.24 | -0.41 | 0.06  | -0.34 | -0.20 | <b>0.9</b> | 0.2448  |
| mmu-miR-302b*     | -0.23 | 0.04  | -0.22 | 0.03  | -0.04 | 0.05  | -0.14 | 0.01  | <b>0.9</b> | 0.3120  |
| mmu-miR-297b-5p   | -0.13 | 0.11  | -0.02 | 0.17  | 0.01  | 0.23  | -0.01 | 0.14  | <b>0.9</b> | 0.3474  |
| mmu-miR-378       | -0.02 | -0.07 | -0.11 | 0.12  | 0.14  | 0.00  | -0.07 | 0.08  | <b>0.9</b> | 0.0383  |
| mmu-miR-18a*      | 0.01  | -0.04 | 0.00  | 0.11  | 0.13  | 0.21  | -0.01 | 0.15  | <b>0.9</b> | 0.0410  |
| mmu-miR-16        | 0.37  | -0.31 | 0.05  | -0.21 | 0.00  | 0.79  | 0.03  | 0.19  | <b>0.9</b> | 0.7198  |
| mmu-miR-466d-3p   | -0.17 | 0.16  | 0.01  | 0.03  | -0.01 | 0.46  | 0.00  | 0.16  | <b>0.9</b> | 0.4561  |
| mmu-miR-425       | 0.03  | -0.11 | -0.08 | 0.17  | 0.16  | -0.01 | -0.06 | 0.11  | <b>0.9</b> | 0.1087  |
| mmu-miR-24-1*     | -0.18 | -0.09 | -0.09 | -0.04 | -0.09 | 0.26  | -0.12 | 0.04  | <b>0.9</b> | 0.2413  |
| mmu-miR-92b       | -0.10 | -0.21 | -0.01 | 0.07  | 0.06  | 0.05  | -0.11 | 0.06  | <b>0.9</b> | 0.1082  |
| mmu-miR-669b      | -0.26 | 0.03  | -0.23 | -0.05 | 0.00  | 0.08  | -0.16 | 0.01  | <b>0.9</b> | 0.2431  |
| mmu-miR-30d       | 0.15  | 0.07  | 0.22  | 0.38  | 0.18  | 0.40  | 0.15  | 0.32  | <b>0.9</b> | 0.0363  |
| mmu-miR-135b      | 0.46  | 0.01  | 0.25  | 0.32  | 0.18  | 0.75  | 0.24  | 0.42  | <b>0.9</b> | 0.4386  |
| mmu-miR-302c*     | -0.52 | 0.05  | -0.53 | -0.13 | -0.28 | -0.07 | -0.33 | -0.16 | <b>0.9</b> | 0.5565  |
| mmu-miR-15a       | 0.23  | -0.31 | -0.01 | -0.13 | -0.03 | 0.60  | -0.03 | 0.15  | <b>0.9</b> | 0.5949  |
| mmu-miR-19a       | 0.03  | -0.21 | -0.05 | -0.10 | -0.04 | 0.46  | -0.08 | 0.10  | <b>0.9</b> | 0.4296  |
| mmu-miR-30e       | 0.19  | -0.15 | 0.06  | 0.04  | 0.03  | 0.58  | 0.03  | 0.21  | <b>0.9</b> | 0.4529  |
| mmu-miR-149       | -0.11 | -0.21 | -0.15 | 0.07  | 0.02  | 0.00  | -0.15 | 0.03  | <b>0.9</b> | 0.0140  |
| mmu-miR-140       | 0.17  | -0.27 | 0.16  | 0.09  | 0.05  | 0.48  | 0.02  | 0.21  | <b>0.9</b> | 0.2997  |
| mmu-miR-717       | 0.04  | -0.18 | -0.33 | 0.51  | 0.39  | -0.80 | -0.15 | 0.03  | <b>0.9</b> | 0.6298  |
| mmu-miR-29a*      | 0.14  | -0.18 | 0.15  | 0.26  | NA    | 0.19  | 0.04  | 0.23  | <b>0.9</b> | 0.2598  |
| mmu-miR-96        | 0.25  | -0.61 | -0.05 | -0.38 | 0.02  | 0.51  | -0.14 | 0.05  | <b>0.9</b> | 0.6925  |
| mmu-miR-421       | -0.21 | -0.18 | -0.18 | -0.29 | -0.13 | 0.42  | -0.19 | 0.00  | <b>0.9</b> | 0.4536  |
| mmu-miR-466a-3p/m | -0.22 | 0.24  | -0.02 | 0.04  | -0.09 | 0.62  | 0.00  | 0.19  | <b>0.9</b> | 0.5686  |
| mmu-miR-350       | 0.00  | -0.33 | -0.16 | -0.05 | -0.09 | 0.21  | -0.17 | 0.03  | <b>0.9</b> | 0.2690  |

|                   |       |       |       |       |       |       |       |       |            |         |
|-------------------|-------|-------|-------|-------|-------|-------|-------|-------|------------|---------|
| mcmv-miR-m108-1   | NA    | NA    | 0.77  | 0.96  | NA    | NA    | 0.77  | 0.96  | <b>0.9</b> | #DIV/0! |
| mmu-miR-148b      | -0.10 | -0.19 | -0.12 | 0.05  | 0.05  | 0.07  | -0.14 | 0.06  | <b>0.9</b> | 0.0169  |
| mmu-miR-9         | 0.45  | 0.28  | 0.48  | 0.39  | 0.37  | 1.04  | 0.40  | 0.60  | <b>0.9</b> | 0.4033  |
| mmu-miR-30a       | 0.00  | -0.21 | -0.03 | 0.12  | 0.02  | 0.21  | -0.08 | 0.12  | <b>0.9</b> | 0.0384  |
| mmu-miR-30b       | 0.13  | -0.46 | -0.02 | -0.13 | -0.10 | 0.49  | -0.12 | 0.09  | <b>0.9</b> | 0.4764  |
| mmu-miR-34a       | -0.08 | -0.29 | -0.03 | 0.03  | 0.04  | 0.16  | -0.13 | 0.08  | <b>0.9</b> | 0.0807  |
| mmu-miR-126-3p    | 0.04  | NA    | -0.06 | NA    | -0.20 | 0.60  | -0.01 | 0.20  | <b>0.9</b> | #DIV/0! |
| mmu-miR-92a       | -0.12 | -0.29 | -0.13 | 0.02  | 0.04  | 0.06  | -0.18 | 0.04  | <b>0.9</b> | 0.0625  |
| mmu-miR-32        | 0.10  | -0.74 | -0.29 | -0.57 | -0.51 | 0.83  | -0.31 | -0.09 | <b>0.9</b> | 0.7066  |
| mmu-miR-190       | 0.44  | NA    | 0.35  | 0.34  | NA    | 0.91  | 0.39  | 0.62  | <b>0.9</b> | 0.6123  |
| mmu-miR-26a       | 0.22  | -0.30 | 0.00  | 0.25  | 0.08  | 0.27  | -0.03 | 0.20  | <b>0.9</b> | 0.1602  |
| mmu-miR-106b      | 0.12  | -0.15 | 0.00  | 0.10  | 0.18  | 0.38  | -0.01 | 0.22  | <b>0.9</b> | 0.2086  |
| mmu-miR-155       | NA    | NA    | 0.38  | NA    | NA    | 0.62  | 0.38  | 0.62  | <b>0.9</b> | #DIV/0! |
| mmu-miR-22*       | -0.23 | -0.12 | -0.14 | 0.16  | 0.02  | 0.04  | -0.16 | 0.07  | <b>0.8</b> | 0.0922  |
| mmu-miR-93        | 0.01  | -0.36 | 0.00  | 0.01  | 0.14  | 0.21  | -0.12 | 0.12  | <b>0.8</b> | 0.2337  |
| mmu-miR-140*      | -0.03 | -0.37 | -0.19 | 0.06  | -0.01 | 0.11  | -0.20 | 0.06  | <b>0.8</b> | 0.0870  |
| mmu-miR-18b       | -0.16 | -0.35 | -0.21 | -0.29 | -0.32 | 0.69  | -0.24 | 0.03  | <b>0.8</b> | 0.5007  |
| mmu-miR-27b       | 0.10  | -0.17 | -0.03 | 0.19  | 0.08  | 0.43  | -0.03 | 0.24  | <b>0.8</b> | 0.1247  |
| mmu-miR-467c      | -0.47 | -0.17 | -0.30 | -0.19 | -0.28 | 0.34  | -0.31 | -0.04 | <b>0.8</b> | 0.3408  |
| mmu-miR-291b-3p   | 0.52  | -0.80 | -0.36 | -0.12 | 0.03  | 0.26  | -0.22 | 0.06  | <b>0.8</b> | 0.6128  |
| mmu-miR-374       | -0.58 | -0.20 | -0.50 | -0.47 | -0.39 | 0.42  | -0.43 | -0.15 | <b>0.8</b> | 0.4921  |
| mmu-miR-26b       | 0.32  | -0.29 | 0.08  | 0.13  | 0.05  | 0.78  | 0.03  | 0.32  | <b>0.8</b> | 0.3887  |
| mmu-miR-200c      | -0.04 | -0.15 | -0.14 | 0.21  | 0.33  | -0.01 | -0.11 | 0.18  | <b>0.8</b> | 0.1135  |
| mmu-miR-466b-3-3p | -0.25 | 0.17  | -0.19 | 0.00  | -0.06 | 0.67  | -0.09 | 0.20  | <b>0.8</b> | 0.4561  |
| mmu-miR-429       | -0.20 | -0.27 | -0.16 | -0.03 | 0.16  | 0.13  | -0.21 | 0.09  | <b>0.8</b> | 0.0606  |
| mmu-miR-151-5p    | -0.15 | -0.27 | NA    | -0.13 | -0.11 | 0.51  | -0.21 | 0.09  | <b>0.8</b> | 0.4016  |
| mmu-miR-367       | -0.52 | 0.14  | -0.54 | -0.08 | -0.43 | 0.50  | -0.31 | -0.01 | <b>0.8</b> | 0.5830  |
| mmu-miR-467b      | -0.28 | 0.12  | -0.13 | 0.04  | -0.04 | 0.65  | -0.09 | 0.21  | <b>0.8</b> | 0.3762  |
| mmu-miR-141       | 0.04  | -0.22 | -0.09 | 0.16  | 0.29  | 0.20  | -0.09 | 0.22  | <b>0.8</b> | 0.1118  |
| mmu-miR-200b      | -0.02 | -0.21 | -0.03 | 0.15  | 0.23  | 0.28  | -0.09 | 0.22  | <b>0.8</b> | 0.0556  |
| mmu-miR-467a      | -0.44 | -0.17 | -0.34 | -0.12 | -0.27 | 0.38  | -0.32 | -0.01 | <b>0.8</b> | 0.3176  |
| mmu-miR-302d      | -0.56 | 0.11  | -0.40 | 0.12  | -0.20 | 0.19  | -0.28 | 0.04  | <b>0.8</b> | 0.4217  |
| mmu-miR-125a-5p   | -0.05 | -0.12 | -0.12 | 0.26  | 0.17  | 0.24  | -0.10 | 0.22  | <b>0.8</b> | 0.0038  |
| mmu-miR-302c      | -0.38 | 0.13  | -0.38 | 0.14  | -0.14 | 0.37  | -0.21 | 0.12  | <b>0.8</b> | 0.3905  |
| mmu-miR-99b       | -0.19 | -0.32 | -0.39 | 0.13  | -0.07 | 0.05  | -0.30 | 0.04  | <b>0.8</b> | 0.0285  |
| mmu-miR-200a      | -0.14 | -0.33 | -0.14 | -0.10 | 0.02  | 0.51  | -0.20 | 0.14  | <b>0.8</b> | 0.1925  |
| mmu-miR-100       | -0.25 | -0.85 | NA    | 0.04  | -0.43 | -0.18 | -0.55 | -0.19 | <b>0.8</b> | 0.1085  |
| mmu-miR-214       | -0.13 | -0.39 | -0.07 | 0.52  | -0.02 | 0.02  | -0.19 | 0.17  | <b>0.8</b> | 0.1532  |
| mmu-miR-302a      | -0.68 | 0.08  | -0.49 | 0.18  | -0.23 | 0.05  | -0.36 | 0.00  | <b>0.8</b> | 0.4025  |

|                 |       |       |       |       |       |       |       |      |            |        |
|-----------------|-------|-------|-------|-------|-------|-------|-------|------|------------|--------|
| mmu-miR-106a    | -0.03 | -0.22 | -0.11 | 0.00  | 0.05  | 0.70  | -0.12 | 0.25 | <b>0.8</b> | 0.2486 |
| mmu-miR-23a     | -0.02 | -0.20 | 0.04  | 0.43  | 0.17  | 0.37  | -0.06 | 0.32 | <b>0.8</b> | 0.0072 |
| mmu-miR-31*     | -0.14 | -0.37 | -0.19 | 0.05  | -0.10 | 0.51  | -0.23 | 0.15 | <b>0.8</b> | 0.1300 |
| mmu-miR-10b     | -0.17 | NA    | -0.05 | 0.24  | 0.10  | 0.52  | -0.11 | 0.29 | <b>0.8</b> | 0.0950 |
| mmu-miR-28      | -0.02 | -0.19 | -0.20 | 0.16  | 0.09  | 0.62  | -0.13 | 0.29 | <b>0.7</b> | 0.1684 |
| mmu-miR-302b    | -0.31 | 0.21  | -0.37 | -0.08 | -0.30 | 1.18  | -0.16 | 0.27 | <b>0.7</b> | 0.5554 |
| mmu-let-7a      | 0.24  | -0.06 | 0.01  | 0.49  | 0.07  | 0.89  | 0.06  | 0.49 | <b>0.7</b> | 0.2086 |
| mmu-miR-152     | -0.01 | -0.45 | -0.22 | 0.46  | -0.06 | 0.20  | -0.23 | 0.20 | <b>0.7</b> | 0.0025 |
| mmu-miR-24-2*   | -0.32 | -0.42 | -0.36 | 0.08  | -0.18 | 0.32  | -0.37 | 0.07 | <b>0.7</b> | 0.0750 |
| mmu-miR-181a    | -0.10 | -0.41 | -0.18 | 0.59  | 0.09  | -0.05 | -0.23 | 0.21 | <b>0.7</b> | 0.1125 |
| mmu-miR-302a*   | -0.52 | -0.18 | -0.48 | -0.01 | -0.21 | 0.37  | -0.40 | 0.05 | <b>0.7</b> | 0.2230 |
| mmu-miR-20a     | 0.04  | -0.62 | -0.21 | -0.37 | -0.32 | 1.27  | -0.26 | 0.19 | <b>0.7</b> | 0.4981 |
| mmu-miR-365     | 0.01  | -0.33 | -0.08 | 0.33  | 0.07  | 0.57  | -0.13 | 0.32 | <b>0.7</b> | 0.0457 |
| mmu-miR-23b     | 0.12  | -0.26 | 0.07  | 0.37  | 0.13  | 0.79  | -0.02 | 0.43 | <b>0.7</b> | 0.0824 |
| mmu-miR-20b     | -0.16 | -0.52 | -0.20 | -0.31 | -0.33 | 1.18  | -0.29 | 0.18 | <b>0.7</b> | 0.4142 |
| mmu-miR-17      | 0.01  | -0.47 | -0.19 | -0.13 | -0.05 | 0.96  | -0.22 | 0.26 | <b>0.7</b> | 0.3267 |
| mmu-let-7f      | 0.50  | -0.10 | 0.23  | 0.67  | 0.10  | 1.29  | 0.21  | 0.69 | <b>0.7</b> | 0.2445 |
| mmu-let-7d      | 0.19  | -0.23 | -0.05 | 0.50  | 0.03  | 0.86  | -0.03 | 0.46 | <b>0.7</b> | 0.1420 |
| mmu-miR-24      | 0.07  | -0.36 | 0.01  | 0.48  | 0.11  | 0.65  | -0.09 | 0.41 | <b>0.7</b> | 0.0167 |
| mmu-miR-29c     | -0.35 | -0.60 | -0.45 | 0.10  | -0.23 | 0.26  | -0.46 | 0.04 | <b>0.7</b> | 0.0381 |
| mmu-miR-10a     | -0.22 | -0.58 | -0.09 | 0.23  | -0.08 | 0.52  | -0.30 | 0.23 | <b>0.7</b> | 0.0088 |
| mmu-miR-221     | 0.03  | -0.26 | -0.05 | 0.66  | 0.17  | 0.45  | -0.10 | 0.43 | <b>0.7</b> | 0.0127 |
| mmu-miR-193     | 0.02  | -0.47 | -0.28 | 0.36  | 0.03  | 0.47  | -0.24 | 0.29 | <b>0.7</b> | 0.0466 |
| mmu-miR-31      | -0.25 | -0.41 | -0.17 | 0.42  | 0.09  | 0.28  | -0.28 | 0.26 | <b>0.7</b> | 0.0160 |
| mmu-let-7g      | 0.12  | -0.29 | -0.11 | 0.60  | 0.01  | 0.77  | -0.09 | 0.46 | <b>0.7</b> | 0.0838 |
| mmu-miR-222     | -0.05 | -0.29 | -0.13 | 0.64  | 0.10  | 0.48  | -0.16 | 0.41 | <b>0.7</b> | 0.0242 |
| mmu-miR-22      | -0.10 | -0.16 | 0.02  | 0.81  | 0.38  | 0.29  | -0.08 | 0.49 | <b>0.7</b> | 0.0899 |
| mmu-miR-29a     | -0.05 | -0.59 | -0.15 | 0.55  | 0.04  | 0.34  | -0.26 | 0.31 | <b>0.7</b> | 0.0053 |
| mmu-miR-27a     | 0.07  | -0.67 | -0.22 | 0.00  | -0.16 | 1.11  | -0.28 | 0.32 | <b>0.7</b> | 0.2816 |
| mmu-miR-29b     | 0.08  | -0.51 | -0.27 | 0.53  | -0.02 | 0.62  | -0.23 | 0.38 | <b>0.7</b> | 0.0480 |
| mmu-let-7i      | -0.03 | -0.50 | -0.17 | 0.62  | 0.06  | 0.45  | -0.23 | 0.38 | <b>0.7</b> | 0.0019 |
| mmu-miR-34c     | 0.04  | -0.44 | -0.07 | 0.33  | 0.03  | 1.05  | -0.16 | 0.47 | <b>0.6</b> | 0.1299 |
| mmu-miR-145     | -0.29 | -0.58 | -0.11 | 0.57  | 0.09  | 0.33  | -0.33 | 0.33 | <b>0.6</b> | 0.0317 |
| mmu-miR-125b-5p | 0.00  | -0.54 | -0.20 | 0.73  | 0.04  | 0.50  | -0.25 | 0.43 | <b>0.6</b> | 0.0044 |
| mmu-miR-199b*   | -0.14 | -0.67 | -0.24 | 0.63  | 0.03  | 0.34  | -0.35 | 0.34 | <b>0.6</b> | 0.0064 |
| mmu-miR-199a-5p | -0.16 | -0.70 | -0.13 | 0.68  | 0.02  | 0.41  | -0.33 | 0.37 | <b>0.6</b> | 0.0142 |
| mmu-miR-335-5p  | 0.86  | -1.48 | -0.91 | 0.44  | 0.63  | -0.48 | -0.51 | 0.20 | <b>0.6</b> | 0.4412 |
| mmu-miR-34b-5p  | -0.27 | -0.75 | -0.42 | 0.16  | -0.28 | 0.85  | -0.48 | 0.24 | <b>0.6</b> | 0.1213 |
| mmu-miR-21      | 0.13  | -0.66 | -0.34 | 0.56  | 0.14  | 0.60  | -0.29 | 0.43 | <b>0.6</b> | 0.0426 |



|                   |       |       |       |      |       |       |         |         |            |         |     |
|-------------------|-------|-------|-------|------|-------|-------|---------|---------|------------|---------|-----|
| mmu-miR-142-3p    | 0.91  | -1.13 | -0.95 | 0.61 | 0.71  | -0.30 | -0.39   | 0.34    | <b>0.6</b> | 0.3601  |     |
| mmu-miR-142-5p    | 0.74  | -1.19 | -0.94 | 0.78 | 0.86  | -0.80 | -0.47   | 0.28    | <b>0.6</b> | 0.3722  |     |
| mmu-miR-199a-3p/m | -0.05 | -0.82 | -0.20 | 0.43 | -0.12 | 1.00  | -0.36   | 0.44    | <b>0.6</b> | 0.0650  |     |
| mmu-miR-143       | -0.09 | -0.65 | -0.09 | 0.80 | 0.08  | 0.92  | -0.28   | 0.60    | <b>0.5</b> | 0.0081  |     |
| mmu-miR-343       | NA    | NA    | NA    | 0.28 | NA    | NA    | #DIV/0! | 0.28    | ####       | #DIV/0! |     |
| mmu-miR-770-5p    | NA    | NA    | NA    | NA   | NA    | NA    | #DIV/0! | #DIV/0! | ####       | #DIV/0! | yes |
| mmu-miR-876-5p    | NA    | NA    | NA    | NA   | NA    | NA    | #DIV/0! | #DIV/0! | ####       | #DIV/0! |     |
| mmu-miR-299       | 0.00  | 0.24  | 0.10  | NA   | NA    | NA    | 0.11    | #DIV/0! | ####       | #DIV/0! | yes |
| mmu-miR-339-3p    | NA    | NA    | NA    | NA   | NA    | NA    | #DIV/0! | #DIV/0! | ####       | #DIV/0! |     |
| mmu-miR-382*      | 0.50  | 0.26  | 0.38  | NA   | NA    | NA    | 0.38    | #DIV/0! | ####       | #DIV/0! |     |
| mmu-miR-673-5p    | NA    | 0.30  | 0.38  | NA   | NA    | NA    | 0.34    | #DIV/0! | ####       | #DIV/0! | yes |
| mmu-miR-154       | 0.34  | NA    | 0.33  | NA   | NA    | NA    | 0.34    | #DIV/0! | ####       | #DIV/0! | yes |
| mmu-miR-212       | NA    | NA    | NA    | NA   | -0.22 | NA    | #DIV/0! | -0.22   | ####       | #DIV/0! |     |
| mmu-miR-540-5p    | 0.09  | NA    | NA    | NA   | NA    | NA    | 0.09    | #DIV/0! | ####       | #DIV/0! | yes |
| mmu-miR-206       | NA    | NA    | NA    | 0.21 | NA    | NA    | #DIV/0! | 0.21    | ####       | #DIV/0! |     |
| mmu-miR-122       | NA    | NA    | NA    | 0.44 | NA    | NA    | #DIV/0! | 0.44    | ####       | #DIV/0! |     |
| mmu-miR-139-5p    | NA    | NA    | 0.06  | NA   | NA    | NA    | 0.06    | #DIV/0! | ####       | #DIV/0! |     |
| mmu-miR-193*      | NA    | NA    | NA    | NA   | NA    | 0.30  | #DIV/0! | 0.30    | ####       | #DIV/0! |     |
| mmu-miR-216a      | NA    | NA    | NA    | NA   | NA    | NA    | #DIV/0! | #DIV/0! | ####       | #DIV/0! |     |
| mmu-miR-27a*      | NA    | NA    | NA    | NA   | NA    | NA    | #DIV/0! | #DIV/0! | ####       | #DIV/0! |     |
| mmu-miR-27b*      | NA    | NA    | 0.00  | NA   | NA    | NA    | 0.00    | #DIV/0! | ####       | #DIV/0! |     |
| mmu-miR-380-5p    | NA    | NA    | 0.24  | NA   | NA    | NA    | 0.24    | #DIV/0! | ####       | #DIV/0! | yes |
| mmu-miR-466f      | NA    | NA    | NA    | NA   | NA    | 0.38  | #DIV/0! | 0.38    | ####       | #DIV/0! |     |
| mmu-miR-489       | NA    | NA    | NA    | NA   | NA    | -0.16 | #DIV/0! | -0.16   | ####       | #DIV/0! |     |
| mmu-miR-539       | 0.65  | NA    | NA    | NA   | NA    | NA    | 0.65    | #DIV/0! | ####       | #DIV/0! | yes |
| mmu-miR-679       | NA    | NA    | 0.06  | NA   | NA    | NA    | 0.06    | #DIV/0! | ####       | #DIV/0! | yes |
| mmu-miR-98        | NA    | NA    | NA    | NA   | NA    | 0.58  | #DIV/0! | 0.58    | ####       | #DIV/0! |     |
| mmu-miR-1194      | NA    | NA    | NA    | NA   | NA    | NA    | #DIV/0! | #DIV/0! | ####       | #DIV/0! |     |
| mmu-miR-138       | NA    | NA    | NA    | NA   | NA    | NA    | #DIV/0! | #DIV/0! | ####       | #DIV/0! |     |
| mmu-miR-340-5p    | NA    | NA    | NA    | NA   | NA    | NA    | #DIV/0! | #DIV/0! | ####       | #DIV/0! |     |
| mmu-miR-693-3p    | NA    | NA    | NA    | NA   | NA    | NA    | #DIV/0! | #DIV/0! | ####       | #DIV/0! |     |
| mmu-miR-698       | NA    | NA    | NA    | NA   | NA    | NA    | #DIV/0! | #DIV/0! | ####       | #DIV/0! |     |
| mmu-let-7c-1*     | NA    | NA    | NA    | NA   | NA    | NA    | #DIV/0! | #DIV/0! | ####       | #DIV/0! |     |
| mmu-let-7f*       | NA    | NA    | NA    | NA   | NA    | NA    | #DIV/0! | #DIV/0! | ####       | #DIV/0! |     |
| mmu-let-7g*       | NA    | NA    | NA    | NA   | NA    | NA    | #DIV/0! | #DIV/0! | ####       | #DIV/0! |     |
| mmu-let-7i*       | NA    | NA    | NA    | NA   | NA    | NA    | #DIV/0! | #DIV/0! | ####       | #DIV/0! |     |
| mmu-miR-1         | NA    | NA    | NA    | NA   | NA    | NA    | #DIV/0! | #DIV/0! | ####       | #DIV/0! |     |
| mmu-miR-101a*     | NA    | NA    | NA    | NA   | NA    | NA    | #DIV/0! | #DIV/0! | ####       | #DIV/0! |     |
| mmu-miR-105       | NA    | NA    | NA    | NA   | NA    | NA    | #DIV/0! | #DIV/0! | ####       | #DIV/0! |     |

|                 |    |    |    |    |    |    |         |         |      |         |     |
|-----------------|----|----|----|----|----|----|---------|---------|------|---------|-----|
| mmu-miR-10b*    | NA | NA | NA | NA | NA | NA | #DIV/0! | #DIV/0! | #### | #DIV/0! |     |
| mmu-miR-1188    | NA | NA | NA | NA | NA | NA | #DIV/0! | #DIV/0! | #### | #DIV/0! | yes |
| mmu-miR-1190    | NA | NA | NA | NA | NA | NA | #DIV/0! | #DIV/0! | #### | #DIV/0! |     |
| mmu-miR-1191    | NA | NA | NA | NA | NA | NA | #DIV/0! | #DIV/0! | #### | #DIV/0! |     |
| mmu-miR-1195    | NA | NA | NA | NA | NA | NA | #DIV/0! | #DIV/0! | #### | #DIV/0! |     |
| mmu-miR-1197    | NA | NA | NA | NA | NA | NA | #DIV/0! | #DIV/0! | #### | #DIV/0! | yes |
| mmu-miR-1199    | NA | NA | NA | NA | NA | NA | #DIV/0! | #DIV/0! | #### | #DIV/0! |     |
| mmu-miR-1224    | NA | NA | NA | NA | NA | NA | #DIV/0! | #DIV/0! | #### | #DIV/0! |     |
| mmu-miR-124*    | NA | NA | NA | NA | NA | NA | #DIV/0! | #DIV/0! | #### | #DIV/0! |     |
| mmu-miR-125b*   | NA | NA | NA | NA | NA | NA | #DIV/0! | #DIV/0! | #### | #DIV/0! |     |
| mmu-miR-126-5p  | NA | NA | NA | NA | NA | NA | #DIV/0! | #DIV/0! | #### | #DIV/0! |     |
| mmu-miR-128     | NA | NA | NA | NA | NA | NA | #DIV/0! | #DIV/0! | #### | #DIV/0! |     |
| mmu-miR-1-2-as  | NA | NA | NA | NA | NA | NA | #DIV/0! | #DIV/0! | #### | #DIV/0! |     |
| mmu-miR-1306    | NA | NA | NA | NA | NA | NA | #DIV/0! | #DIV/0! | #### | #DIV/0! |     |
| mmu-miR-132     | NA | NA | NA | NA | NA | NA | #DIV/0! | #DIV/0! | #### | #DIV/0! |     |
| mmu-miR-133a    | NA | NA | NA | NA | NA | NA | #DIV/0! | #DIV/0! | #### | #DIV/0! |     |
| mmu-miR-133a*   | NA | NA | NA | NA | NA | NA | #DIV/0! | #DIV/0! | #### | #DIV/0! |     |
| mmu-miR-135a*   | NA | NA | NA | NA | NA | NA | #DIV/0! | #DIV/0! | #### | #DIV/0! |     |
| mmu-miR-137     | NA | NA | NA | NA | NA | NA | #DIV/0! | #DIV/0! | #### | #DIV/0! |     |
| mmu-miR-139-3p  | NA | NA | NA | NA | NA | NA | #DIV/0! | #DIV/0! | #### | #DIV/0! |     |
| mmu-miR-141*    | NA | NA | NA | NA | NA | NA | #DIV/0! | #DIV/0! | #### | #DIV/0! |     |
| mmu-miR-144     | NA | NA | NA | NA | NA | NA | #DIV/0! | #DIV/0! | #### | #DIV/0! |     |
| mmu-miR-145*    | NA | NA | NA | NA | NA | NA | #DIV/0! | #DIV/0! | #### | #DIV/0! |     |
| mmu-miR-146a    | NA | NA | NA | NA | NA | NA | #DIV/0! | #DIV/0! | #### | #DIV/0! |     |
| mmu-miR-146b    | NA | NA | NA | NA | NA | NA | #DIV/0! | #DIV/0! | #### | #DIV/0! |     |
| mmu-miR-146b*   | NA | NA | NA | NA | NA | NA | #DIV/0! | #DIV/0! | #### | #DIV/0! |     |
| mmu-miR-147     | NA | NA | NA | NA | NA | NA | #DIV/0! | #DIV/0! | #### | #DIV/0! |     |
| mmu-miR-148a*   | NA | NA | NA | NA | NA | NA | #DIV/0! | #DIV/0! | #### | #DIV/0! |     |
| mmu-miR-150*    | NA | NA | NA | NA | NA | NA | #DIV/0! | #DIV/0! | #### | #DIV/0! |     |
| mmu-miR-151-3p  | NA | NA | NA | NA | NA | NA | #DIV/0! | #DIV/0! | #### | #DIV/0! |     |
| mmu-miR-153     | NA | NA | NA | NA | NA | NA | #DIV/0! | #DIV/0! | #### | #DIV/0! |     |
| mmu-miR-15a*    | NA | NA | NA | NA | NA | NA | #DIV/0! | #DIV/0! | #### | #DIV/0! |     |
| mmu-miR-15b*    | NA | NA | NA | NA | NA | NA | #DIV/0! | #DIV/0! | #### | #DIV/0! |     |
| mmu-miR-181a-1* | NA | NA | NA | NA | NA | NA | #DIV/0! | #DIV/0! | #### | #DIV/0! |     |
| mmu-miR-181a-2* | NA | NA | NA | NA | NA | NA | #DIV/0! | #DIV/0! | #### | #DIV/0! |     |
| mmu-miR-186*    | NA | NA | NA | NA | NA | NA | #DIV/0! | #DIV/0! | #### | #DIV/0! |     |
| mmu-miR-187     | NA | NA | NA | NA | NA | NA | #DIV/0! | #DIV/0! | #### | #DIV/0! |     |
| mmu-miR-188-3p  | NA | NA | NA | NA | NA | NA | #DIV/0! | #DIV/0! | #### | #DIV/0! |     |
| mmu-miR-188-5p  | NA | NA | NA | NA | NA | NA | #DIV/0! | #DIV/0! | #### | #DIV/0! |     |



|                   |    |    |    |    |    |    |         |         |      |         |     |
|-------------------|----|----|----|----|----|----|---------|---------|------|---------|-----|
| mmu-miR-340-3p    | NA | NA | NA | NA | NA | NA | #DIV/0! | #DIV/0! | #### | #DIV/0! |     |
| mmu-miR-342-5p    | NA | NA | NA | NA | NA | NA | #DIV/0! | #DIV/0! | #### | #DIV/0! |     |
| mmu-miR-345-3p    | NA | NA | NA | NA | NA | NA | #DIV/0! | #DIV/0! | #### | #DIV/0! |     |
| mmu-miR-362-5p    | NA | NA | NA | NA | NA | NA | #DIV/0! | #DIV/0! | #### | #DIV/0! |     |
| mmu-miR-369-5p    | NA | NA | NA | NA | NA | NA | #DIV/0! | #DIV/0! | #### | #DIV/0! | yes |
| mmu-miR-374*      | NA | NA | NA | NA | NA | NA | #DIV/0! | #DIV/0! | #### | #DIV/0! |     |
| mmu-miR-376a*     | NA | NA | NA | NA | NA | NA | #DIV/0! | #DIV/0! | #### | #DIV/0! | yes |
| mmu-miR-376b*     | NA | NA | NA | NA | NA | NA | #DIV/0! | #DIV/0! | #### | #DIV/0! | yes |
| mmu-miR-376c*     | NA | NA | NA | NA | NA | NA | #DIV/0! | #DIV/0! | #### | #DIV/0! | yes |
| mmu-miR-378*      | NA | NA | NA | NA | NA | NA | #DIV/0! | #DIV/0! | #### | #DIV/0! |     |
| mmu-miR-384-3p    | NA | NA | NA | NA | NA | NA | #DIV/0! | #DIV/0! | #### | #DIV/0! |     |
| mmu-miR-384-5p    | NA | NA | NA | NA | NA | NA | #DIV/0! | #DIV/0! | #### | #DIV/0! |     |
| mmu-miR-425*      | NA | NA | NA | NA | NA | NA | #DIV/0! | #DIV/0! | #### | #DIV/0! |     |
| mmu-miR-448       | NA | NA | NA | NA | NA | NA | #DIV/0! | #DIV/0! | #### | #DIV/0! |     |
| mmu-miR-449a      | NA | NA | NA | NA | NA | NA | #DIV/0! | #DIV/0! | #### | #DIV/0! |     |
| mmu-miR-449b      | NA | NA | NA | NA | NA | NA | #DIV/0! | #DIV/0! | #### | #DIV/0! |     |
| mmu-miR-449c      | NA | NA | NA | NA | NA | NA | #DIV/0! | #DIV/0! | #### | #DIV/0! |     |
| mmu-miR-450a-3p   | NA | NA | NA | NA | NA | NA | #DIV/0! | #DIV/0! | #### | #DIV/0! |     |
| mmu-miR-450a-5p   | NA | NA | NA | NA | NA | NA | #DIV/0! | #DIV/0! | #### | #DIV/0! |     |
| mmu-miR-450b-5p   | NA | NA | NA | NA | NA | NA | #DIV/0! | #DIV/0! | #### | #DIV/0! |     |
| mmu-miR-451       | NA | NA | NA | NA | NA | NA | #DIV/0! | #DIV/0! | #### | #DIV/0! |     |
| mmu-miR-452       | NA | NA | NA | NA | NA | NA | #DIV/0! | #DIV/0! | #### | #DIV/0! |     |
| mmu-miR-453       | NA | NA | NA | NA | NA | NA | #DIV/0! | #DIV/0! | #### | #DIV/0! | yes |
| mmu-miR-455*      | NA | NA | NA | NA | NA | NA | #DIV/0! | #DIV/0! | #### | #DIV/0! |     |
| mmu-miR-463       | NA | NA | NA | NA | NA | NA | #DIV/0! | #DIV/0! | #### | #DIV/0! |     |
| mmu-miR-463*      | NA | NA | NA | NA | NA | NA | #DIV/0! | #DIV/0! | #### | #DIV/0! |     |
| mmu-miR-464       | NA | NA | NA | NA | NA | NA | #DIV/0! | #DIV/0! | #### | #DIV/0! |     |
| mmu-miR-465a-3p/m | NA | NA | NA | NA | NA | NA | #DIV/0! | #DIV/0! | #### | #DIV/0! |     |
| mmu-miR-466j      | NA | NA | NA | NA | NA | NA | #DIV/0! | #DIV/0! | #### | #DIV/0! |     |
| mmu-miR-466k      | NA | NA | NA | NA | NA | NA | #DIV/0! | #DIV/0! | #### | #DIV/0! |     |
| mmu-miR-466l      | NA | NA | NA | NA | NA | NA | #DIV/0! | #DIV/0! | #### | #DIV/0! |     |
| mmu-miR-467d      | NA | NA | NA | NA | NA | NA | #DIV/0! | #DIV/0! | #### | #DIV/0! |     |
| mmu-miR-469       | NA | NA | NA | NA | NA | NA | #DIV/0! | #DIV/0! | #### | #DIV/0! |     |
| mmu-miR-470*      | NA | NA | NA | NA | NA | NA | #DIV/0! | #DIV/0! | #### | #DIV/0! |     |
| mmu-miR-483       | NA | NA | NA | NA | NA | NA | #DIV/0! | #DIV/0! | #### | #DIV/0! |     |
| mmu-miR-485       | NA | NA | NA | NA | NA | NA | #DIV/0! | #DIV/0! | #### | #DIV/0! | yes |
| mmu-miR-486       | NA | NA | NA | NA | NA | NA | #DIV/0! | #DIV/0! | #### | #DIV/0! |     |
| mmu-miR-488       | NA | NA | NA | NA | NA | NA | #DIV/0! | #DIV/0! | #### | #DIV/0! |     |
| mmu-miR-488*      | NA | NA | NA | NA | NA | NA | #DIV/0! | #DIV/0! | #### | #DIV/0! |     |

|                 |    |    |    |    |    |    |         |         |      |         |     |
|-----------------|----|----|----|----|----|----|---------|---------|------|---------|-----|
| mmu-miR-491     | NA | NA | NA | NA | NA | NA | #DIV/0! | #DIV/0! | #### | #DIV/0! |     |
| mmu-miR-493     | NA | NA | NA | NA | NA | NA | #DIV/0! | #DIV/0! | #### | #DIV/0! | yes |
| mmu-miR-496     | NA | NA | NA | NA | NA | NA | #DIV/0! | #DIV/0! | #### | #DIV/0! | yes |
| mmu-miR-497     | NA | NA | NA | NA | NA | NA | #DIV/0! | #DIV/0! | #### | #DIV/0! |     |
| mmu-miR-499     | NA | NA | NA | NA | NA | NA | #DIV/0! | #DIV/0! | #### | #DIV/0! |     |
| mmu-miR-501-3p  | NA | NA | NA | NA | NA | NA | #DIV/0! | #DIV/0! | #### | #DIV/0! |     |
| mmu-miR-501-5p  | NA | NA | NA | NA | NA | NA | #DIV/0! | #DIV/0! | #### | #DIV/0! |     |
| mmu-miR-504     | NA | NA | NA | NA | NA | NA | #DIV/0! | #DIV/0! | #### | #DIV/0! |     |
| mmu-miR-505     | NA | NA | NA | NA | NA | NA | #DIV/0! | #DIV/0! | #### | #DIV/0! |     |
| mmu-miR-509-5p  | NA | NA | NA | NA | NA | NA | #DIV/0! | #DIV/0! | #### | #DIV/0! |     |
| mmu-miR-511     | NA | NA | NA | NA | NA | NA | #DIV/0! | #DIV/0! | #### | #DIV/0! |     |
| mmu-miR-532-3p  | NA | NA | NA | NA | NA | NA | #DIV/0! | #DIV/0! | #### | #DIV/0! |     |
| mmu-miR-532-5p  | NA | NA | NA | NA | NA | NA | #DIV/0! | #DIV/0! | #### | #DIV/0! |     |
| mmu-miR-543     | NA | NA | NA | NA | NA | NA | #DIV/0! | #DIV/0! | #### | #DIV/0! | yes |
| mmu-miR-544     | NA | NA | NA | NA | NA | NA | #DIV/0! | #DIV/0! | #### | #DIV/0! | yes |
| mmu-miR-546     | NA | NA | NA | NA | NA | NA | #DIV/0! | #DIV/0! | #### | #DIV/0! |     |
| mmu-miR-547     | NA | NA | NA | NA | NA | NA | #DIV/0! | #DIV/0! | #### | #DIV/0! |     |
| mmu-miR-568     | NA | NA | NA | NA | NA | NA | #DIV/0! | #DIV/0! | #### | #DIV/0! |     |
| mmu-miR-574-3p  | NA | NA | NA | NA | NA | NA | #DIV/0! | #DIV/0! | #### | #DIV/0! |     |
| mmu-miR-582-5p  | NA | NA | NA | NA | NA | NA | #DIV/0! | #DIV/0! | #### | #DIV/0! |     |
| mmu-miR-590-3p  | NA | NA | NA | NA | NA | NA | #DIV/0! | #DIV/0! | #### | #DIV/0! |     |
| mmu-miR-590-5p  | NA | NA | NA | NA | NA | NA | #DIV/0! | #DIV/0! | #### | #DIV/0! |     |
| mmu-miR-592     | NA | NA | NA | NA | NA | NA | #DIV/0! | #DIV/0! | #### | #DIV/0! |     |
| mmu-miR-598     | NA | NA | NA | NA | NA | NA | #DIV/0! | #DIV/0! | #### | #DIV/0! |     |
| mmu-miR-652     | NA | NA | NA | NA | NA | NA | #DIV/0! | #DIV/0! | #### | #DIV/0! |     |
| mmu-miR-653     | NA | NA | NA | NA | NA | NA | #DIV/0! | #DIV/0! | #### | #DIV/0! |     |
| mmu-miR-654-5p  | NA | NA | NA | NA | NA | NA | #DIV/0! | #DIV/0! | #### | #DIV/0! |     |
| mmu-miR-666-3p  | NA | NA | NA | NA | NA | NA | #DIV/0! | #DIV/0! | #### | #DIV/0! | yes |
| mmu-miR-669g    | NA | NA | NA | NA | NA | NA | #DIV/0! | #DIV/0! | #### | #DIV/0! | yes |
| mmu-miR-669h-5p | NA | NA | NA | NA | NA | NA | #DIV/0! | #DIV/0! | #### | #DIV/0! |     |
| mmu-miR-669j    | NA | NA | NA | NA | NA | NA | #DIV/0! | #DIV/0! | #### | #DIV/0! |     |
| mmu-miR-669k    | NA | NA | NA | NA | NA | NA | #DIV/0! | #DIV/0! | #### | #DIV/0! |     |
| mmu-miR-670     | NA | NA | NA | NA | NA | NA | #DIV/0! | #DIV/0! | #### | #DIV/0! |     |
| mmu-miR-671-3p  | NA | NA | NA | NA | NA | NA | #DIV/0! | #DIV/0! | #### | #DIV/0! |     |
| mmu-miR-676     | NA | NA | NA | NA | NA | NA | #DIV/0! | #DIV/0! | #### | #DIV/0! |     |
| mmu-miR-676*    | NA | NA | NA | NA | NA | NA | #DIV/0! | #DIV/0! | #### | #DIV/0! |     |
| mmu-miR-680     | NA | NA | NA | NA | NA | NA | #DIV/0! | #DIV/0! | #### | #DIV/0! |     |
| mmu-miR-681     | NA | NA | NA | NA | NA | NA | #DIV/0! | #DIV/0! | #### | #DIV/0! |     |
| mmu-miR-682     | NA | NA | NA | NA | NA | NA | #DIV/0! | #DIV/0! | #### | #DIV/0! |     |



|                      |    |      |    |      |    |    |         |         |      |         |
|----------------------|----|------|----|------|----|----|---------|---------|------|---------|
| mcmv-miR-m01-1       | NA | NA   | NA | NA   | NA | NA | #DIV/0! | #DIV/0! | #### | #DIV/0! |
| mcmv-miR-m01-2       | NA | NA   | NA | NA   | NA | NA | #DIV/0! | #DIV/0! | #### | #DIV/0! |
| mcmv-miR-m01-2*      | NA | NA   | NA | NA   | NA | NA | #DIV/0! | #DIV/0! | #### | #DIV/0! |
| mcmv-miR-m01-3       | NA | NA   | NA | NA   | NA | NA | #DIV/0! | #DIV/0! | #### | #DIV/0! |
| mcmv-miR-m01-3*      | NA | NA   | NA | NA   | NA | NA | #DIV/0! | #DIV/0! | #### | #DIV/0! |
| mcmv-miR-m01-4       | NA | NA   | NA | NA   | NA | NA | #DIV/0! | #DIV/0! | #### | #DIV/0! |
| mcmv-miR-m01-4*      | NA | NA   | NA | NA   | NA | NA | #DIV/0! | #DIV/0! | #### | #DIV/0! |
| mcmv-miR-m107-1-3    | NA | NA   | NA | NA   | NA | NA | #DIV/0! | #DIV/0! | #### | #DIV/0! |
| mcmv-miR-m107-1-5    | NA | NA   | NA | NA   | NA | NA | #DIV/0! | #DIV/0! | #### | #DIV/0! |
| mcmv-miR-m108-1*     | NA | NA   | NA | NA   | NA | NA | #DIV/0! | #DIV/0! | #### | #DIV/0! |
| mcmv-miR-m108-2-3    | NA | NA   | NA | NA   | NA | NA | #DIV/0! | #DIV/0! | #### | #DIV/0! |
| mcmv-miR-m108-2-5    | NA | NA   | NA | NA   | NA | NA | #DIV/0! | #DIV/0! | #### | #DIV/0! |
| mcmv-miR-m108-2-5    | NA | NA   | NA | NA   | NA | NA | #DIV/0! | #DIV/0! | #### | #DIV/0! |
| mcmv-miR-m21-1       | NA | NA   | NA | NA   | NA | NA | #DIV/0! | #DIV/0! | #### | #DIV/0! |
| mcmv-miR-m22-1       | NA | NA   | NA | NA   | NA | NA | #DIV/0! | #DIV/0! | #### | #DIV/0! |
| mcmv-miR-M23-1-3p    | NA | NA   | NA | NA   | NA | NA | #DIV/0! | #DIV/0! | #### | #DIV/0! |
| mcmv-miR-M23-2       | NA | NA   | NA | NA   | NA | NA | #DIV/0! | #DIV/0! | #### | #DIV/0! |
| mcmv-miR-M23-2*      | NA | 0.57 | NA | NA   | NA | NA | 0.57    | #DIV/0! | #### | #DIV/0! |
| mcmv-miR-M44-1       | NA | NA   | NA | NA   | NA | NA | #DIV/0! | #DIV/0! | #### | #DIV/0! |
| mcmv-miR-M55-1       | NA | NA   | NA | NA   | NA | NA | #DIV/0! | #DIV/0! | #### | #DIV/0! |
| mcmv-miR-m59-1       | NA | NA   | NA | NA   | NA | NA | #DIV/0! | #DIV/0! | #### | #DIV/0! |
| mcmv-miR-m59-2       | NA | NA   | NA | NA   | NA | NA | #DIV/0! | #DIV/0! | #### | #DIV/0! |
| mcmv-miR-M87-1       | NA | NA   | NA | NA   | NA | NA | #DIV/0! | #DIV/0! | #### | #DIV/0! |
| mcmv-miR-m88-1*      | NA | NA   | NA | NA   | NA | NA | #DIV/0! | #DIV/0! | #### | #DIV/0! |
| mcmv-miR-M95-1-3p    | NA | NA   | NA | NA   | NA | NA | #DIV/0! | #DIV/0! | #### | #DIV/0! |
| mcmv-miR-M95-1-5p    | NA | NA   | NA | 1.42 | NA | NA | #DIV/0! | 1.42    | #### | #DIV/0! |
| mghv-miR-M1-1        | NA | NA   | NA | NA   | NA | NA | #DIV/0! | #DIV/0! | #### | #DIV/0! |
| mghv-miR-M1-6        | NA | NA   | NA | 0.40 | NA | NA | #DIV/0! | 0.40    | #### | #DIV/0! |
| mghv-miR-M1-7-5p     | NA | NA   | NA | NA   | NA | NA | #DIV/0! | #DIV/0! | #### | #DIV/0! |
| mghv-miR-M1-9        | NA | NA   | NA | NA   | NA | NA | #DIV/0! | #DIV/0! | #### | #DIV/0! |
| SNORD49A-5           | NA | NA   | NA | NA   | NA | NA | #DIV/0! | #DIV/0! | #### | #DIV/0! |
| SNORD66-5            | NA | NA   | NA | NA   | NA | NA | #DIV/0! | #DIV/0! | #### | #DIV/0! |
| hsa_SNORD10          | NA | NA   | NA | NA   | NA | NA | #DIV/0! | #DIV/0! | #### | #DIV/0! |
| hsa_SNORD118         | NA | NA   | NA | NA   | NA | NA | #DIV/0! | #DIV/0! | #### | #DIV/0! |
| hsa_SNORD15A         | NA | NA   | NA | NA   | NA | NA | #DIV/0! | #DIV/0! | #### | #DIV/0! |
| hsa_SNORD4A          | NA | NA   | NA | NA   | NA | NA | #DIV/0! | #DIV/0! | #### | #DIV/0! |
| hsa_negative_control | NA | NA   | NA | NA   | NA | NA | #DIV/0! | #DIV/0! | #### | #DIV/0! |
| hsa_negative_control | NA | NA   | NA | NA   | NA | NA | #DIV/0! | #DIV/0! | #### | #DIV/0! |
| hsa_negative_control | NA | NA   | NA | NA   | NA | NA | #DIV/0! | #DIV/0! | #### | #DIV/0! |

|                      |    |    |    |    |    |    |         |         |      |         |
|----------------------|----|----|----|----|----|----|---------|---------|------|---------|
| hsa_negative_control | NA | NA | NA | NA | NA | NA | #DIV/0! | #DIV/0! | #### | #DIV/0! |
| hsa_negative_control | NA | NA | NA | NA | NA | NA | #DIV/0! | #DIV/0! | #### | #DIV/0! |
| hsa_negative_control | NA | NA | NA | NA | NA | NA | #DIV/0! | #DIV/0! | #### | #DIV/0! |
| hsa_negative_control | NA | NA | NA | NA | NA | NA | #DIV/0! | #DIV/0! | #### | #DIV/0! |



**Supplemental Table 6: 4n blastocyst injections with NT lines and rescued iPSC clone**

| Line                      | Gtl2 | Blasts transferred | Resorptions | Stillborn | liveborn (%blasts) | viable pups | adult mice |
|---------------------------|------|--------------------|-------------|-----------|--------------------|-------------|------------|
| Oct4ind ESCs <sup>1</sup> | on   | 33                 | 9           | 0         | 3 (9.1%)           | 0           | 0          |
| Adeno-1                   | off  | 40                 | 10          | 0         | 0                  | 0           | 0          |
| NT-Adeno 1-1              | off  | 35                 | 18          | 0         | 0                  | 0           | 0          |
| NT-Adeno 2-1              | off  | 15                 | 5           | 0         | 0                  | 0           | 0          |
| NT-Adeno 2-2              | off  | 17                 | 3           | 0         | 0                  | 0           | 0          |
| NT-Adeno 2-3              | off  | 7                  | 2           | 0         | 0                  | 0           | 0          |
| VPA-10                    | on   | 67                 | 20          | 5         | 0                  | 0           | 0          |
| iPSC#45                   | off  | 65                 | 36          | 0         | 0                  | 0           | 0          |

<sup>1</sup> Oct4ind ESCs were chosen as controls because iPSC clones Adeno-1 and Adeno-2 carry an inducible allele of the Oct4.

**Supplemental Table 7. Primers used for qPCR**

| <b>Gene</b>     | <b>forward</b>          | <b>reverse</b>           |
|-----------------|-------------------------|--------------------------|
| <i>Pou5f1</i>   | TAGGTGAGCCGTCTTTCCAC    | GCTTAGCCAGGTTTCGAGGAT    |
| <i>Gapdh</i>    | AGGTCGGTGTGAACGGATTTG   | TGTAGACCATGTAGTTGAGGTCA  |
| <i>Dlk1</i>     | CCCAGGTGAGCTTCGAGTG     | GGAGAGGGGTTACTCTTGTTGAG  |
| <i>Gtl2</i>     | TTGCACATTTCTGTGGGAC     | AAGCACCATGAGCCACTAGG     |
| <i>Rian</i>     | TCGAGACACAAGAGGACTGC    | ATTGGAAGTCTGAGCCATGG     |
| <i>Mirg</i>     | TTGACTCCAGAAGATGCTCC    | CCTCAGGTTCTAAGCAAGG      |
| <i>Igf2</i>     | GTGCTGCATCGCTGCTTAC     | ACGTCCCTCTCGGACTTGG      |
| <i>Igf2r</i>    | GGGAAGCTGTTGACTCCAAAA   | GCAGCCCATAGTGGTGTGAA     |
| <i>Pax3</i>     | TTTCACCTCAGGTAATGGGACT  | GAACGTCCAAGGCTTACTTTGT   |
| <i>Myogenin</i> | GAGACATCCCCCTATTTCTACCA | GCTCAGTCCGCTCATAGCC      |
| <i>Pax7</i>     | TCTCCAAGATTCTGTGCCGAT   | CGGGGTTCTCTCTTATACTCC    |
| <i>Nkx2.5</i>   | GACAAAGCCGAGACGGATGG    | CTGTGCTTGCACCTGTAGC      |
| <i>Islet-1</i>  | ATGATGGTGGTTTACAGGCTAAC | TCGATGCTACTTCACTGCCAG    |
| <i>Myf5</i>     | AAGGCTCCTGTATCCCCTCAC   | TGACCTTCTTCAGGCGTCTAC    |
| <i>MyoD</i>     | CCACTCCGGGACATAGACTTG   | AAAAGCGCAGGTCTGGTGAG     |
| <i>Decorin</i>  | TCTTGGGCTGGACCATTTGAA   | CATCGGTAGGGGCACATAGA     |
| <i>Mest</i>     | GTGGTGGGTCCAAGTAGGG     | AAGCACAACCTATCTCAGGGCT   |
| <i>Ins2</i>     | GCTTCTTCTACACCCCATGTC   | AGCACTGATCTACAATGCCAC    |
| <i>Pax6</i>     | GCAGATGCAAAAGTCCAGGTG   | CAGGTTGCGAAGAACTCTGTTT   |
| <i>Mash1</i>    | GCAACCGGGTCAAGTTGGT     | GTCGTTGGAGTAGTTGGGGG     |
| <i>Hes5</i>     | AGTCCCAAGGAGAAAAACCGA   | GCTGTGTTTCAGGTAGCTGAC    |
| <i>Phlda2</i>   | CTCCGACGAGATCCTTTGCG    | ACACGTACTIONAGAGGTGTGCTC |
| <i>Cdkn1c</i>   | CGAGGAGCAGGACGAGAATC    | GAAGAAGTCGTTCCGATTGGC    |
